# Supplementary material for: A new class of anti-proliferative activity and apoptotic inducer with molecular docking studies for a novel of 1,3-dithiolo[4,5-b]quinoxaline derivatives hybrid with a sulfonamide moiety
Source: Royal Society of Chemistry journal article supplement (doi:10.1039/d3ra01635h), 2023-01-01
Supplement: d3ra01635h1.pdf [file d3ra01635h1.pdf]

**A new class of anti-proliferative activity and apoptotic inducer with molecular docking studies for a novel of 1,3-dithiolo[4,5-*b*]quinoxaline derivatives hybrid with a sulfonamide moiety**

Mostafa A. Ismail <sup>1</sup>, Moustafa S. Abusaif <sup>2</sup>, Mohamed S. A. El-Gaby <sup>2,\*</sup>, Yousry A. Ammar <sup>2,\*</sup> and Ahmed Ragab <sup>2,\*</sup>

<sup>1</sup>Chemistry Department, Faculty of Science, Al-Azhar University, Assiut, 71524, Egypt

<sup>2</sup>Chemistry Department, Faculty of Science (Boys), Al-Azhar University, Nasr City, Cairo, 11884, Egypt

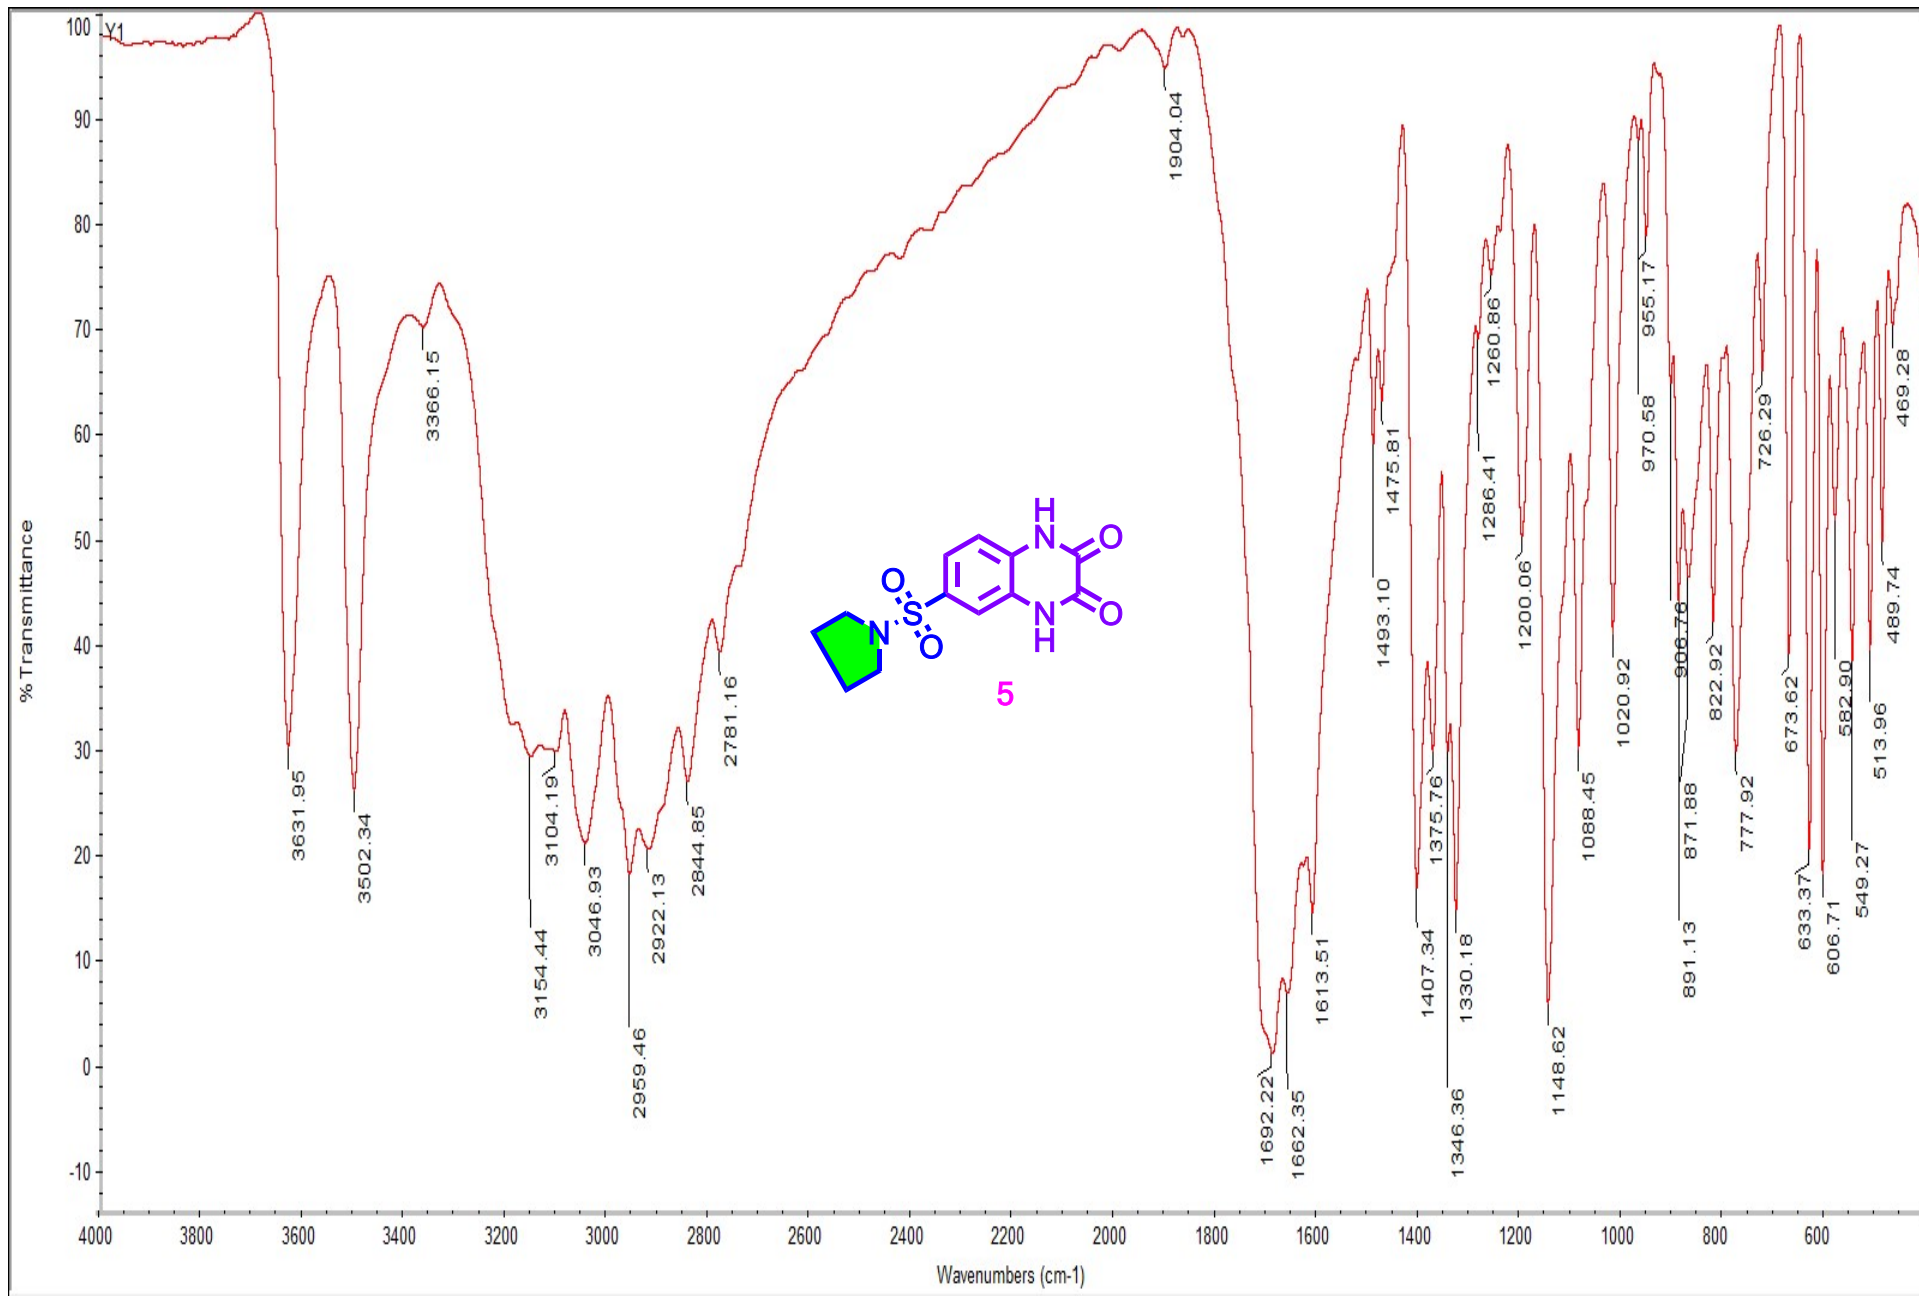

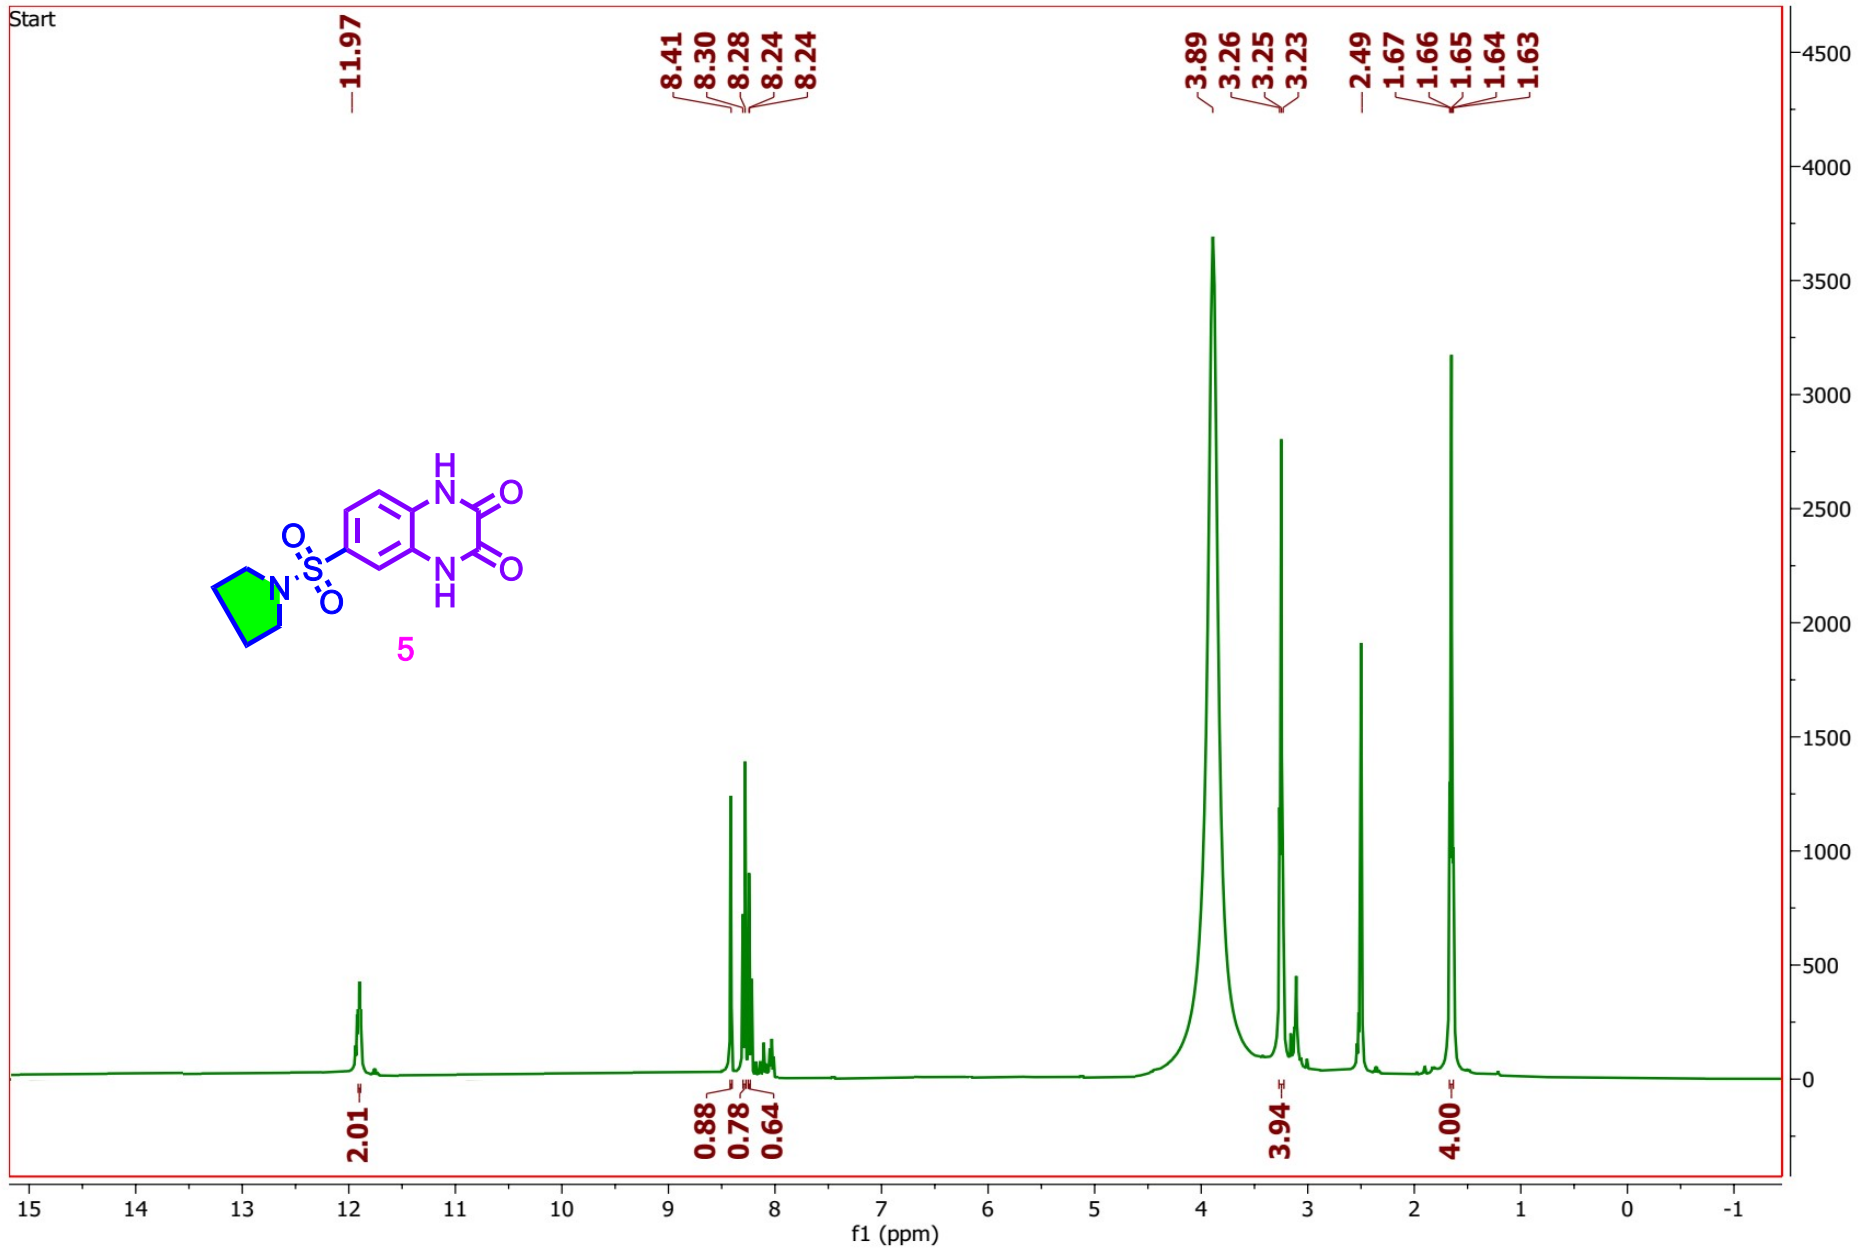

C NMR

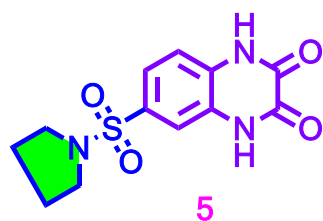

167.44

139.53

138.99

130.03

127.68

126.16

124.94

48.31

25.10

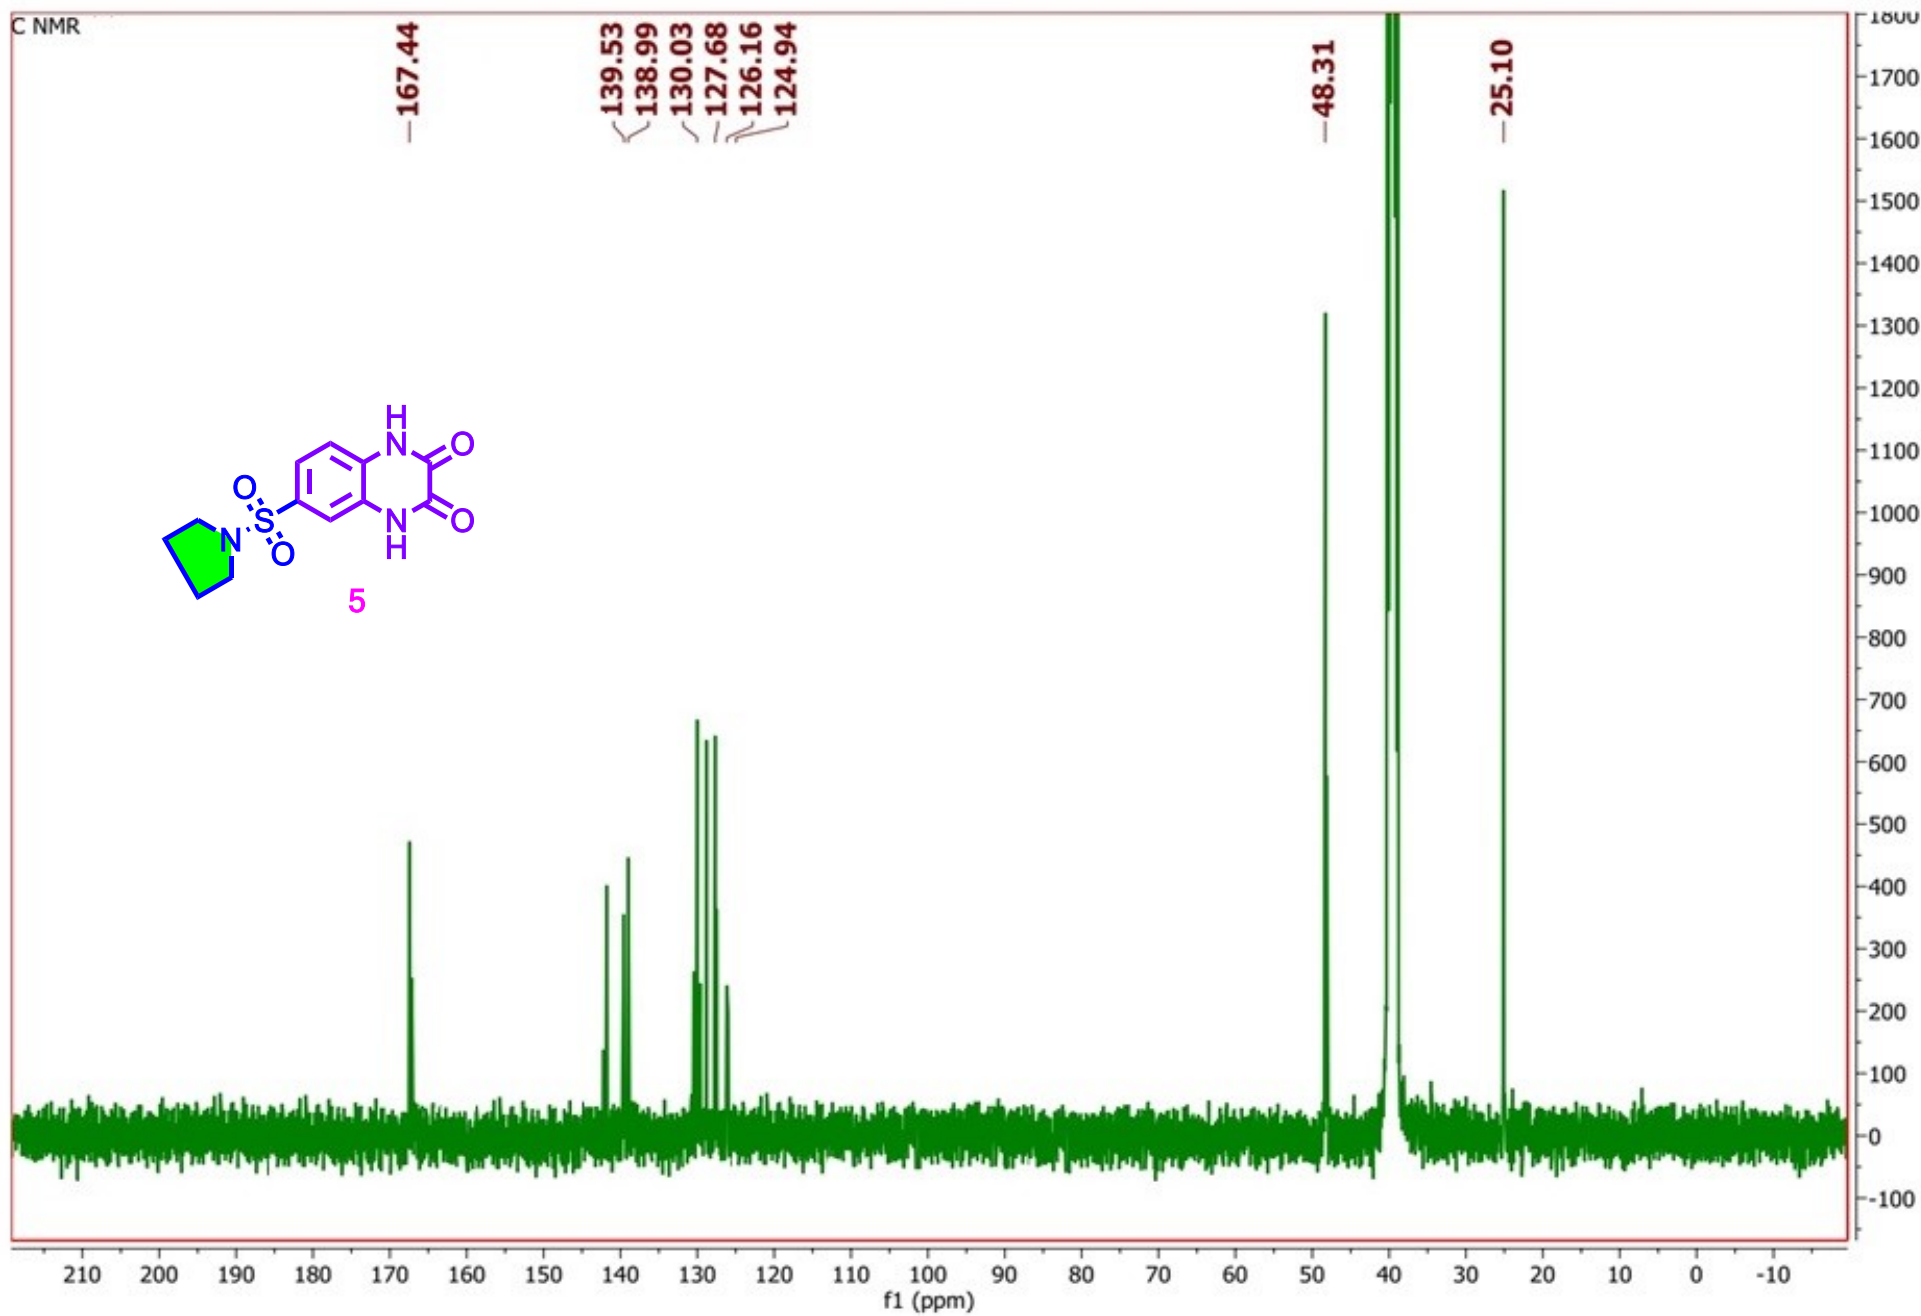

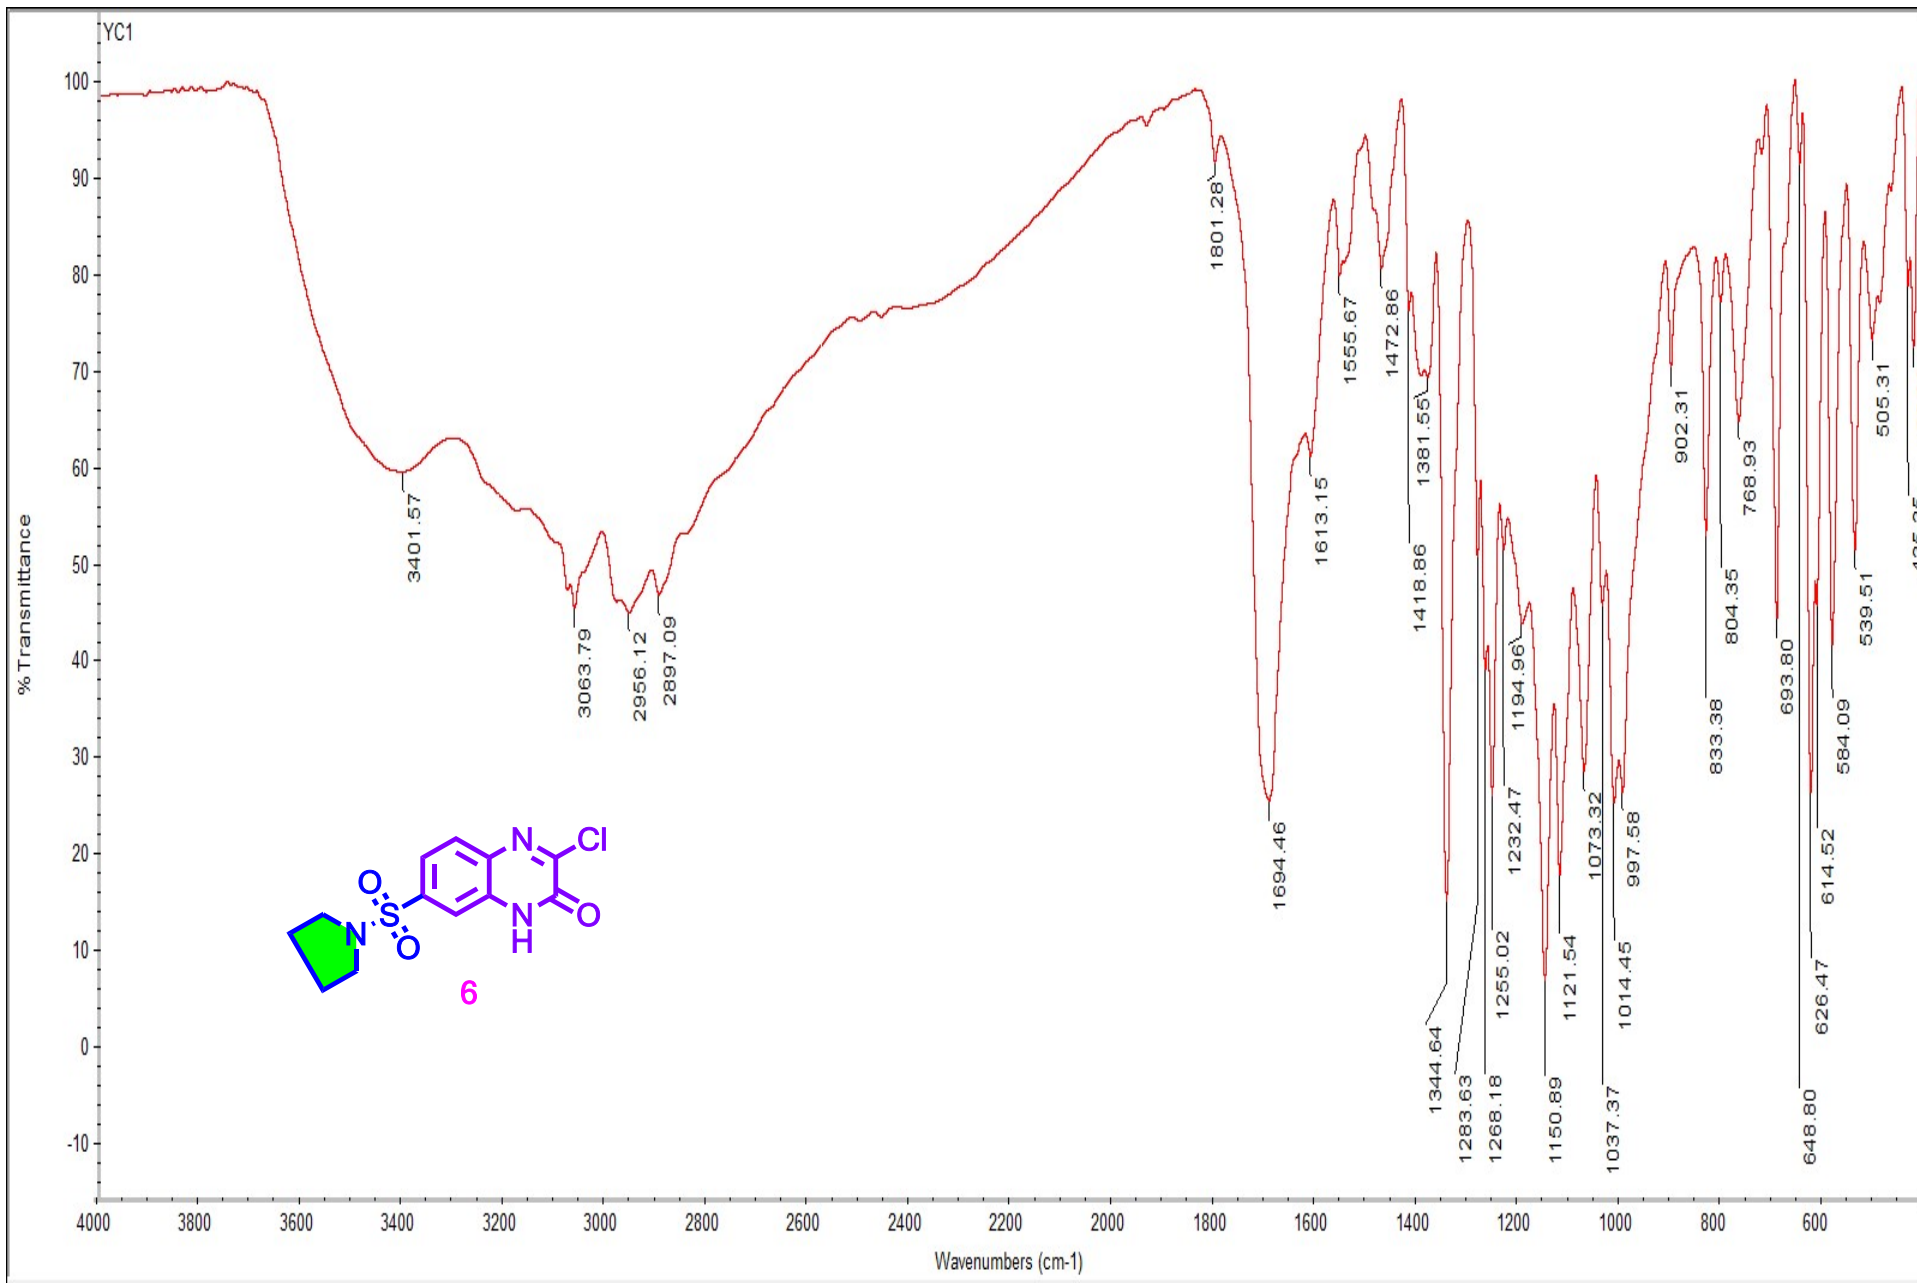

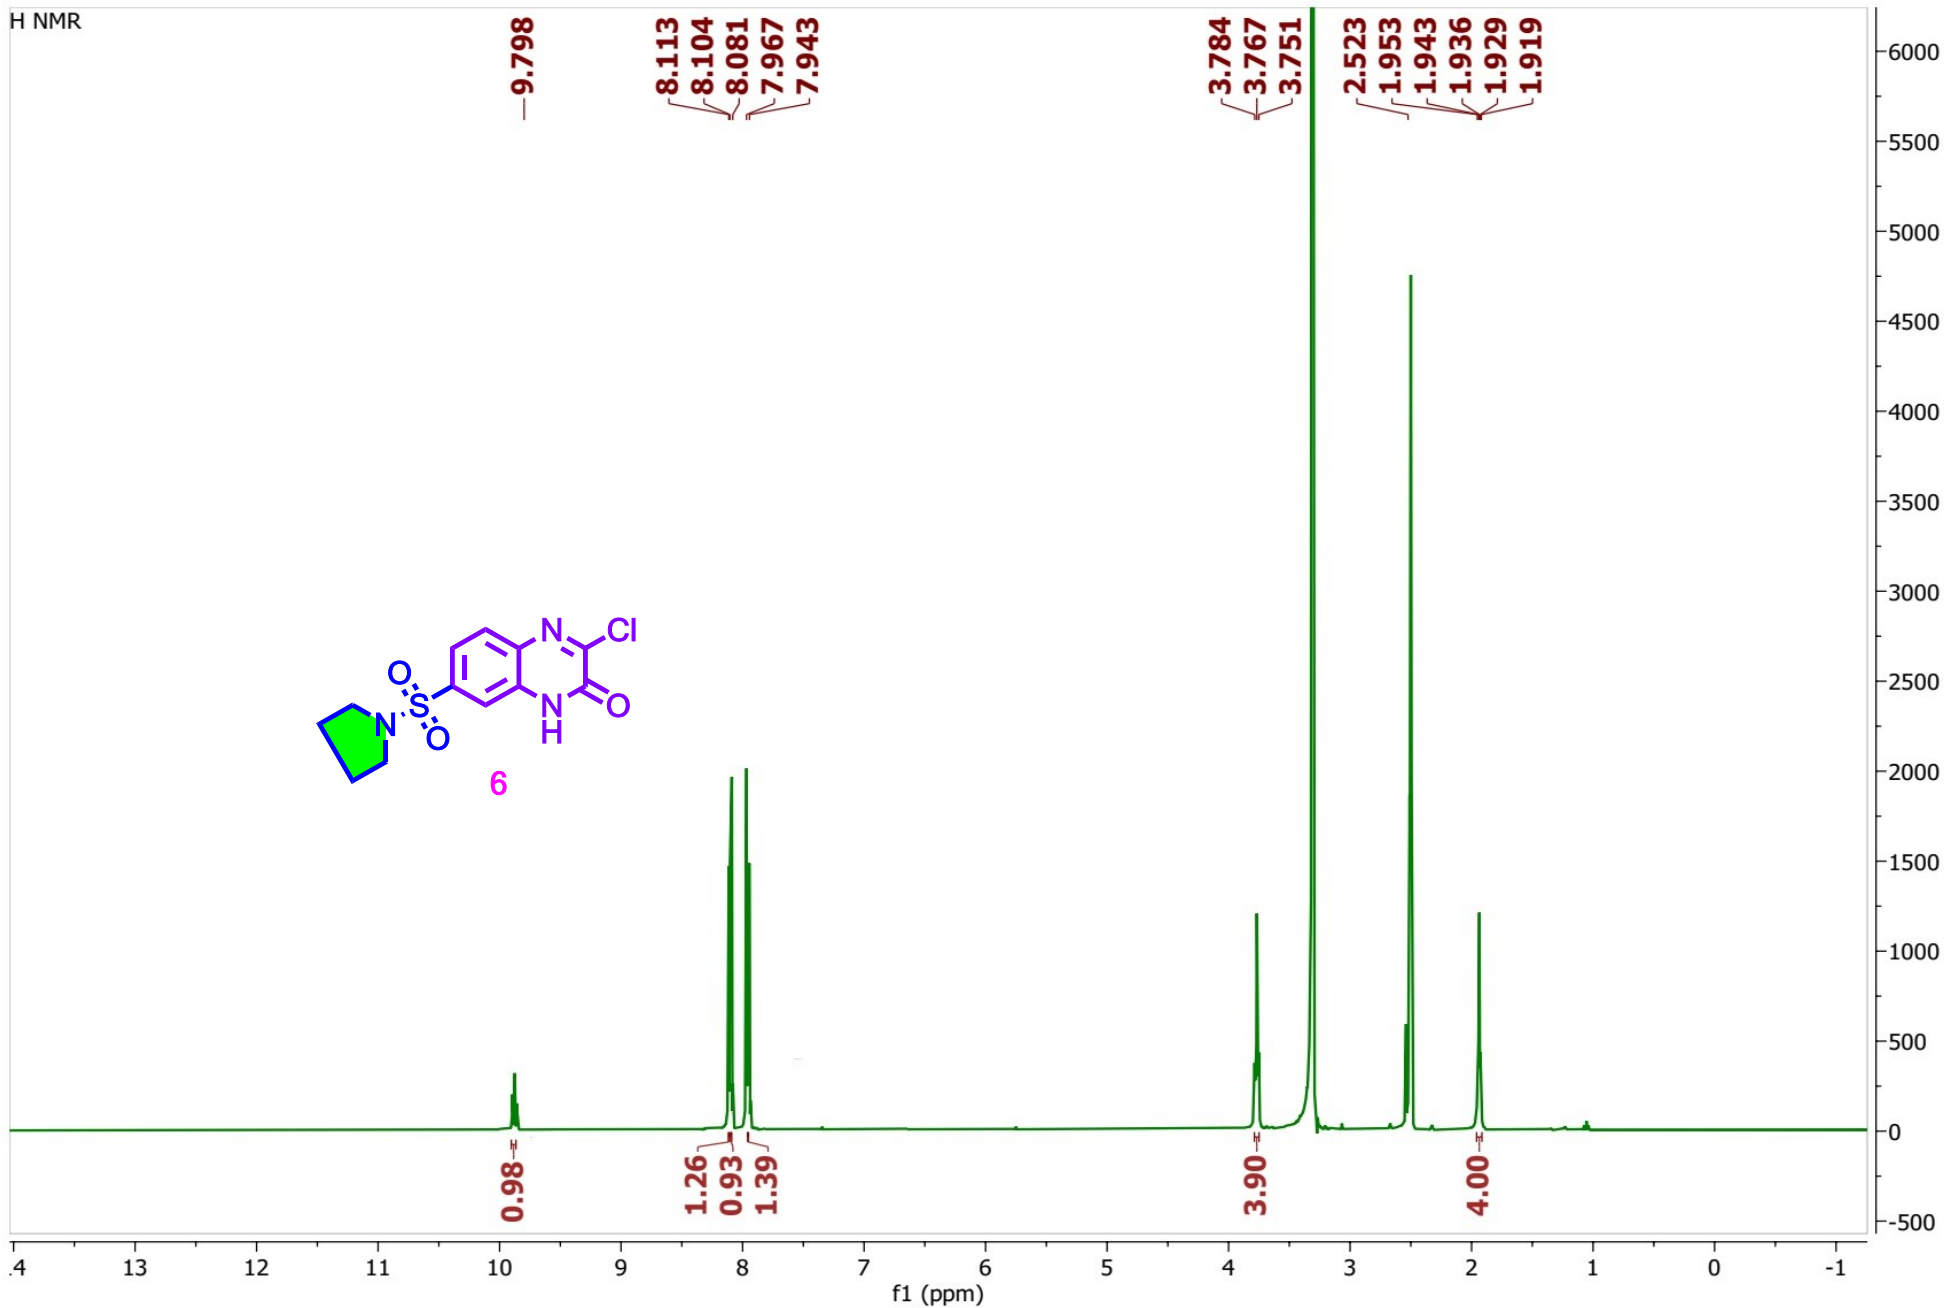

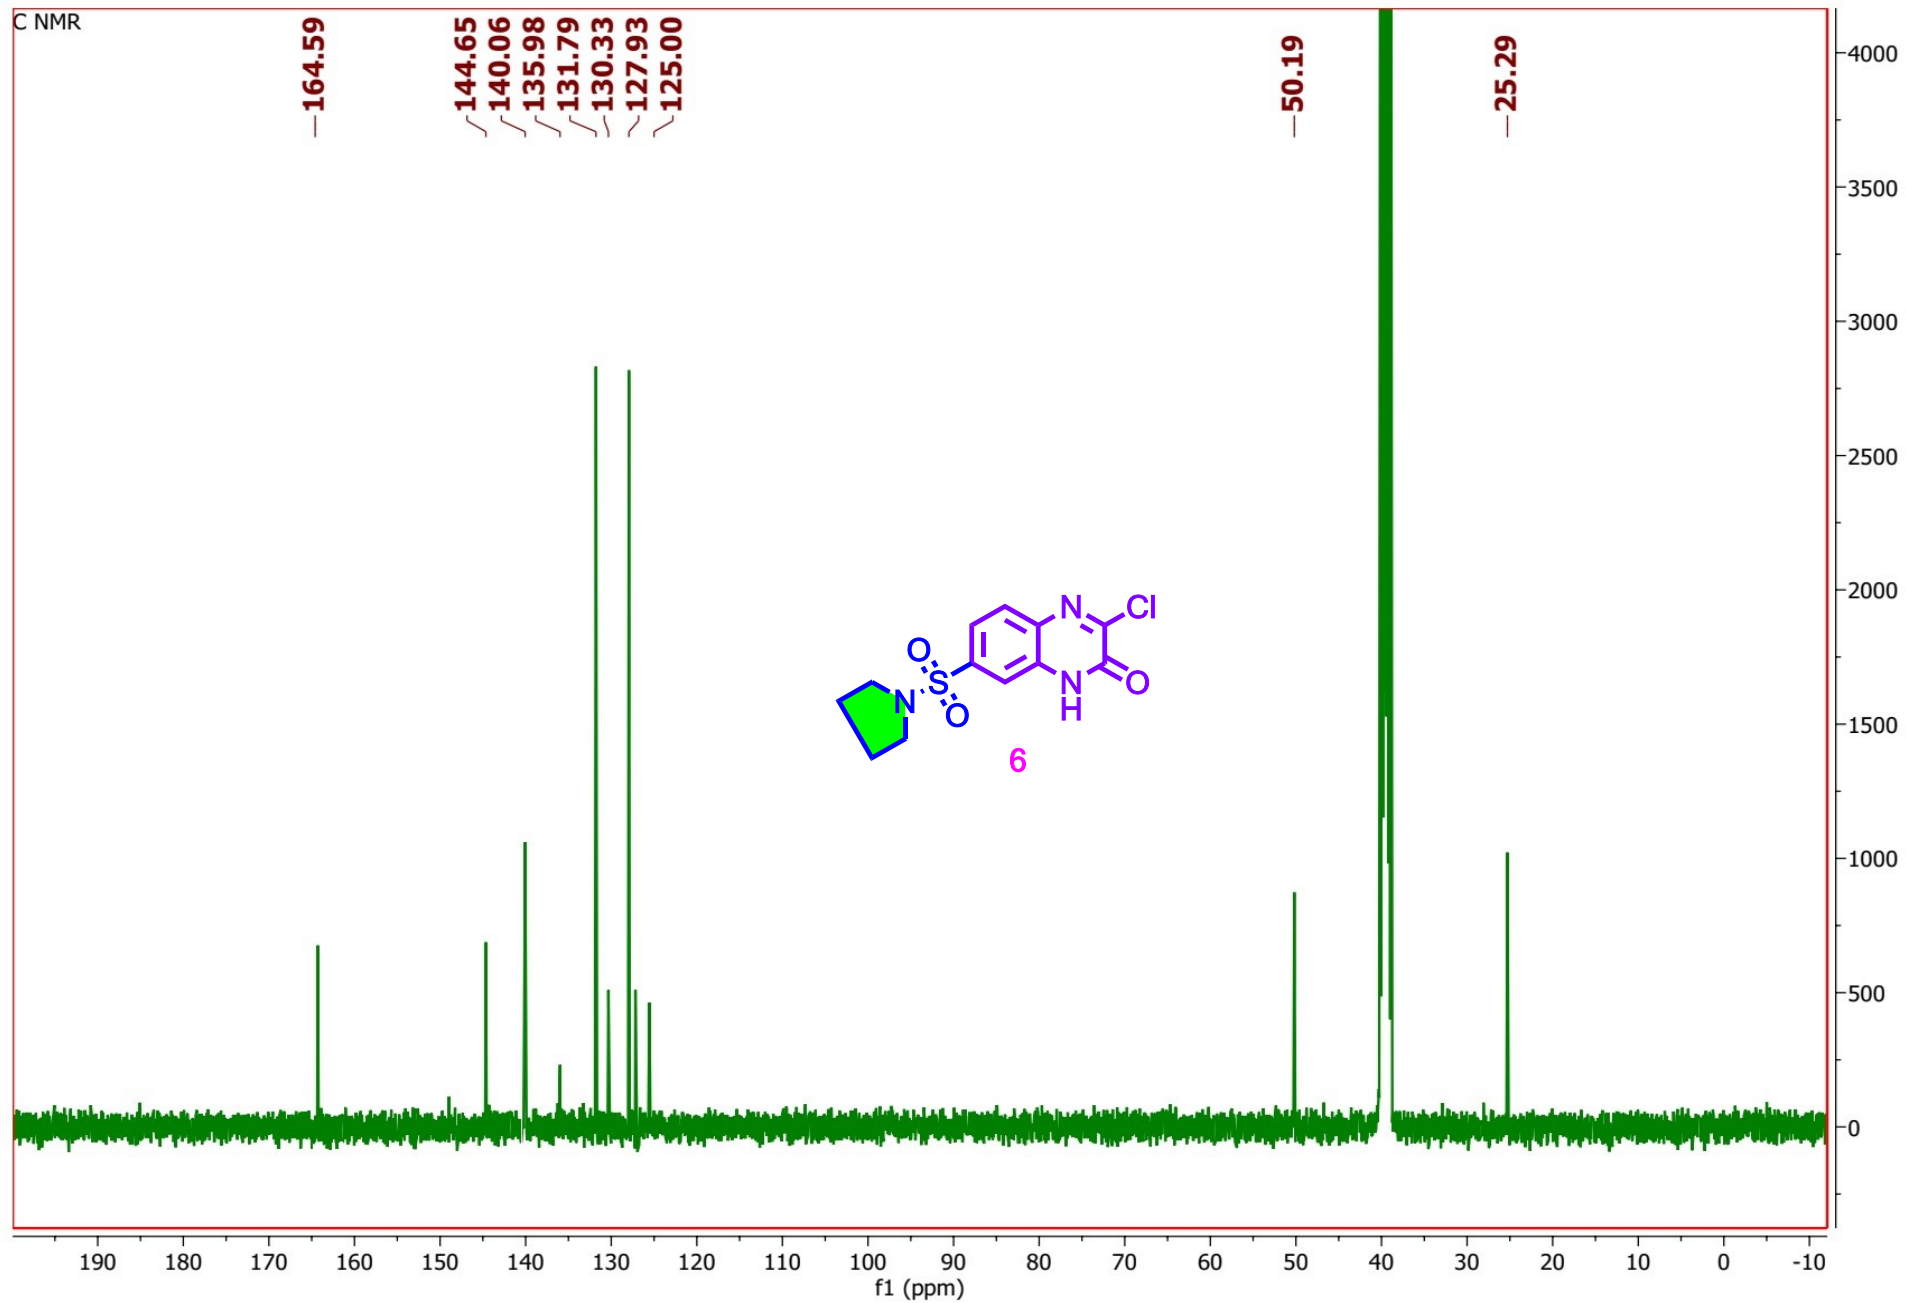

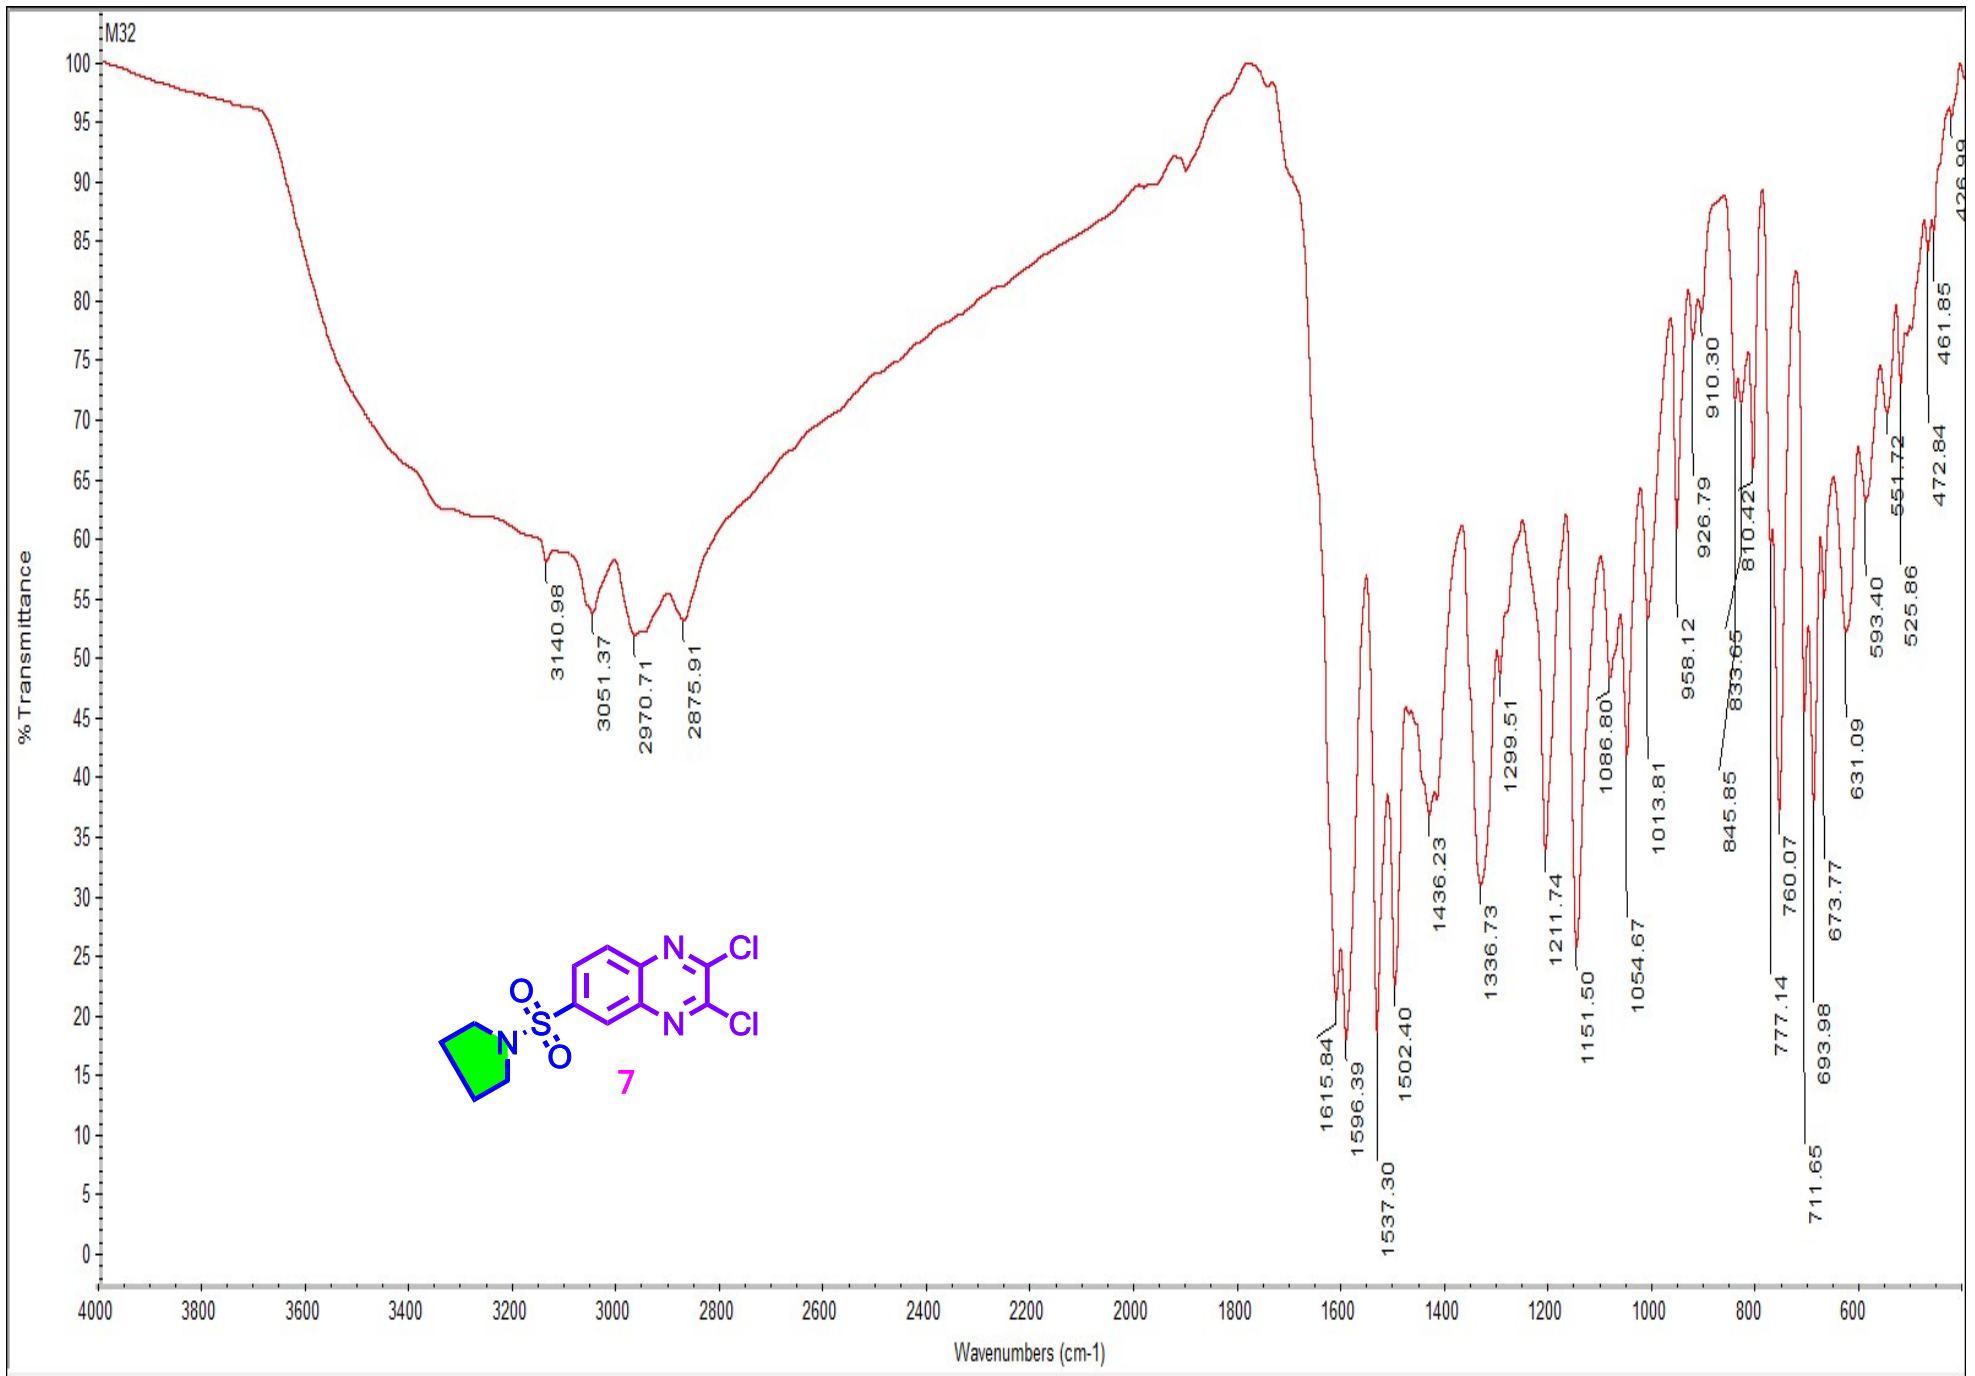



H NMR (3b)

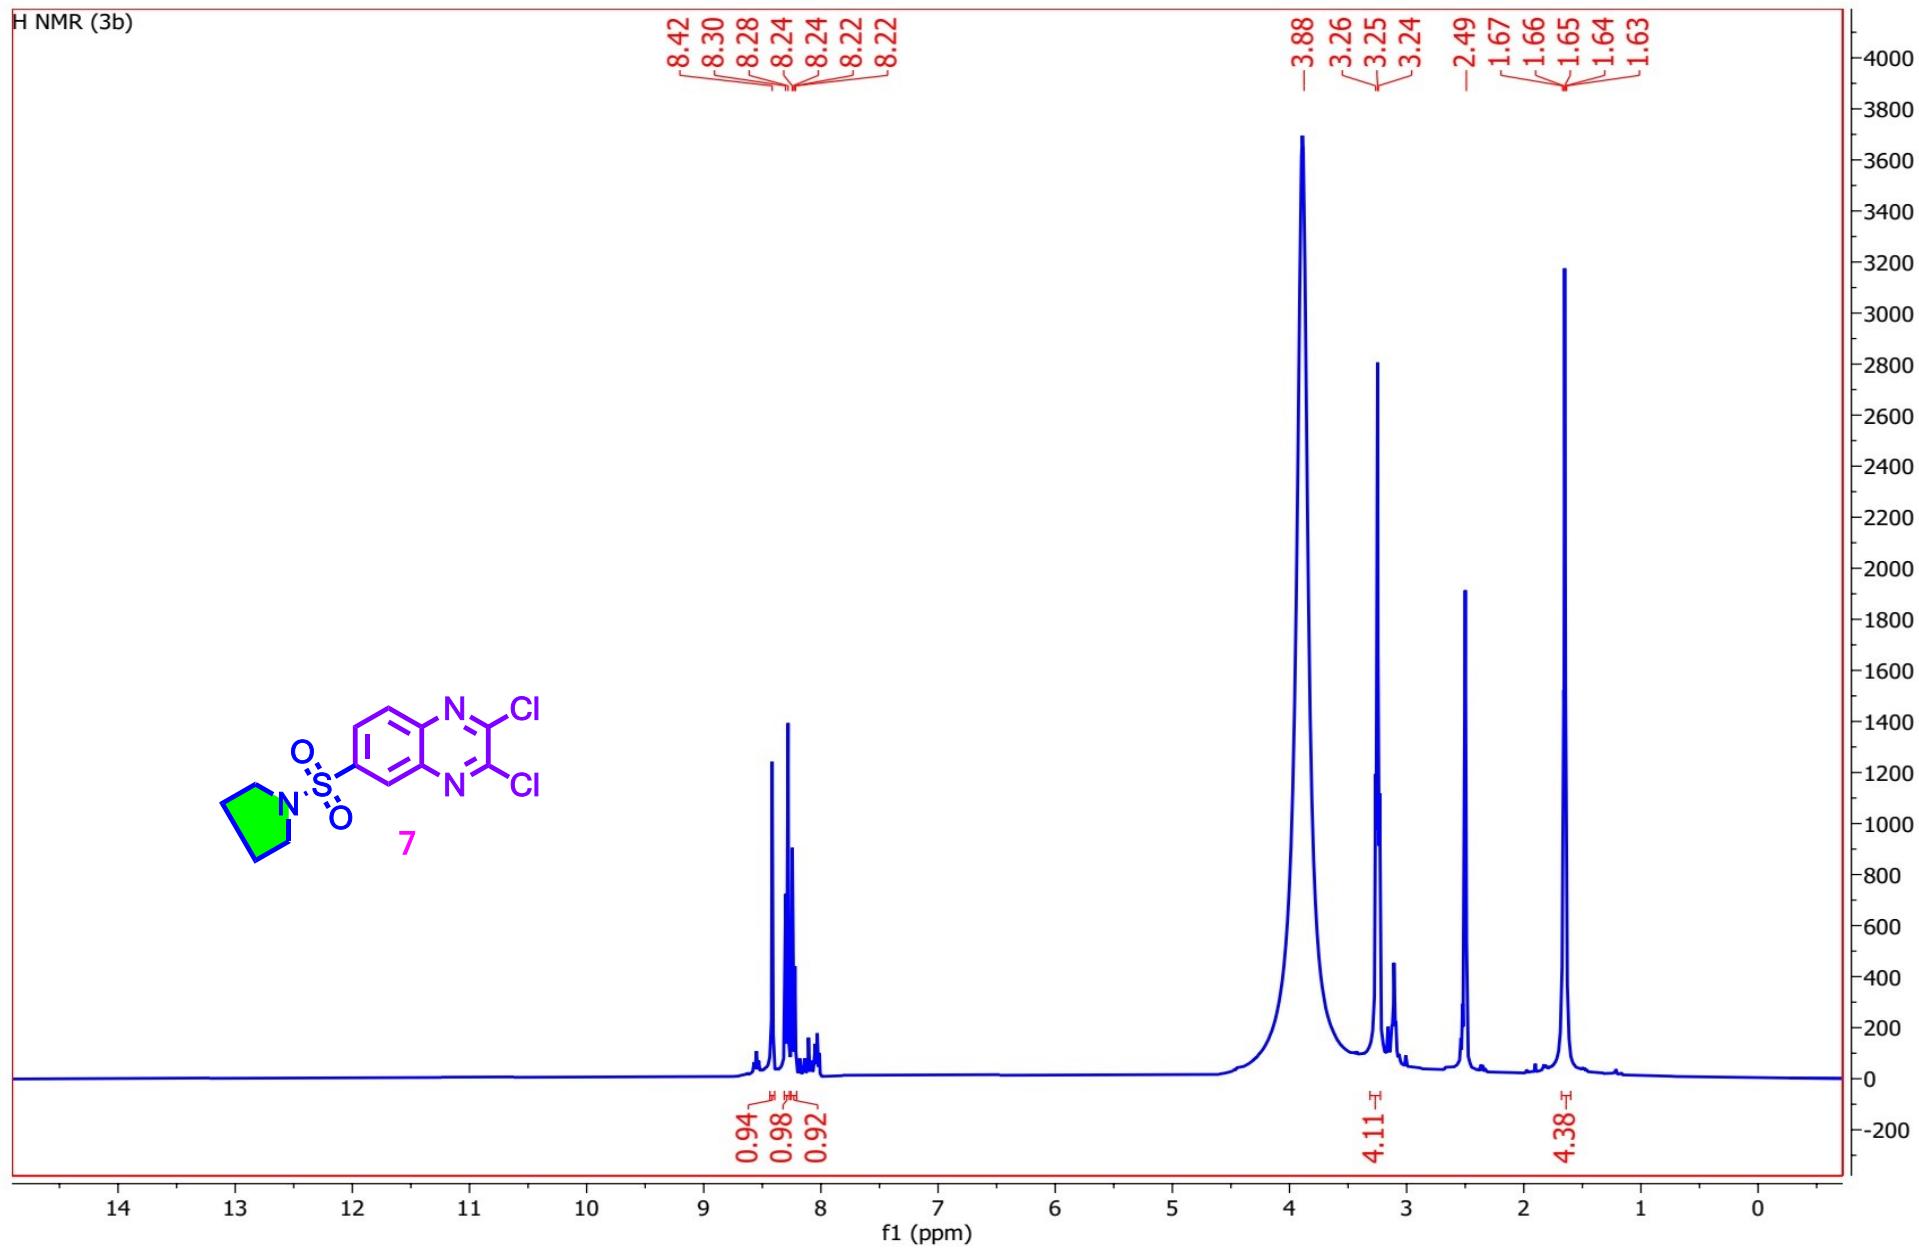

C NMR (3b)

147.77  
147.09  
141.78  
139.53  
138.99  
130.03  
127.68  
125.99

48.31

25.10

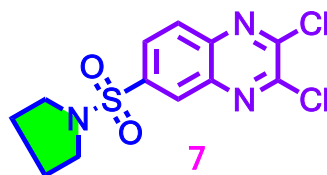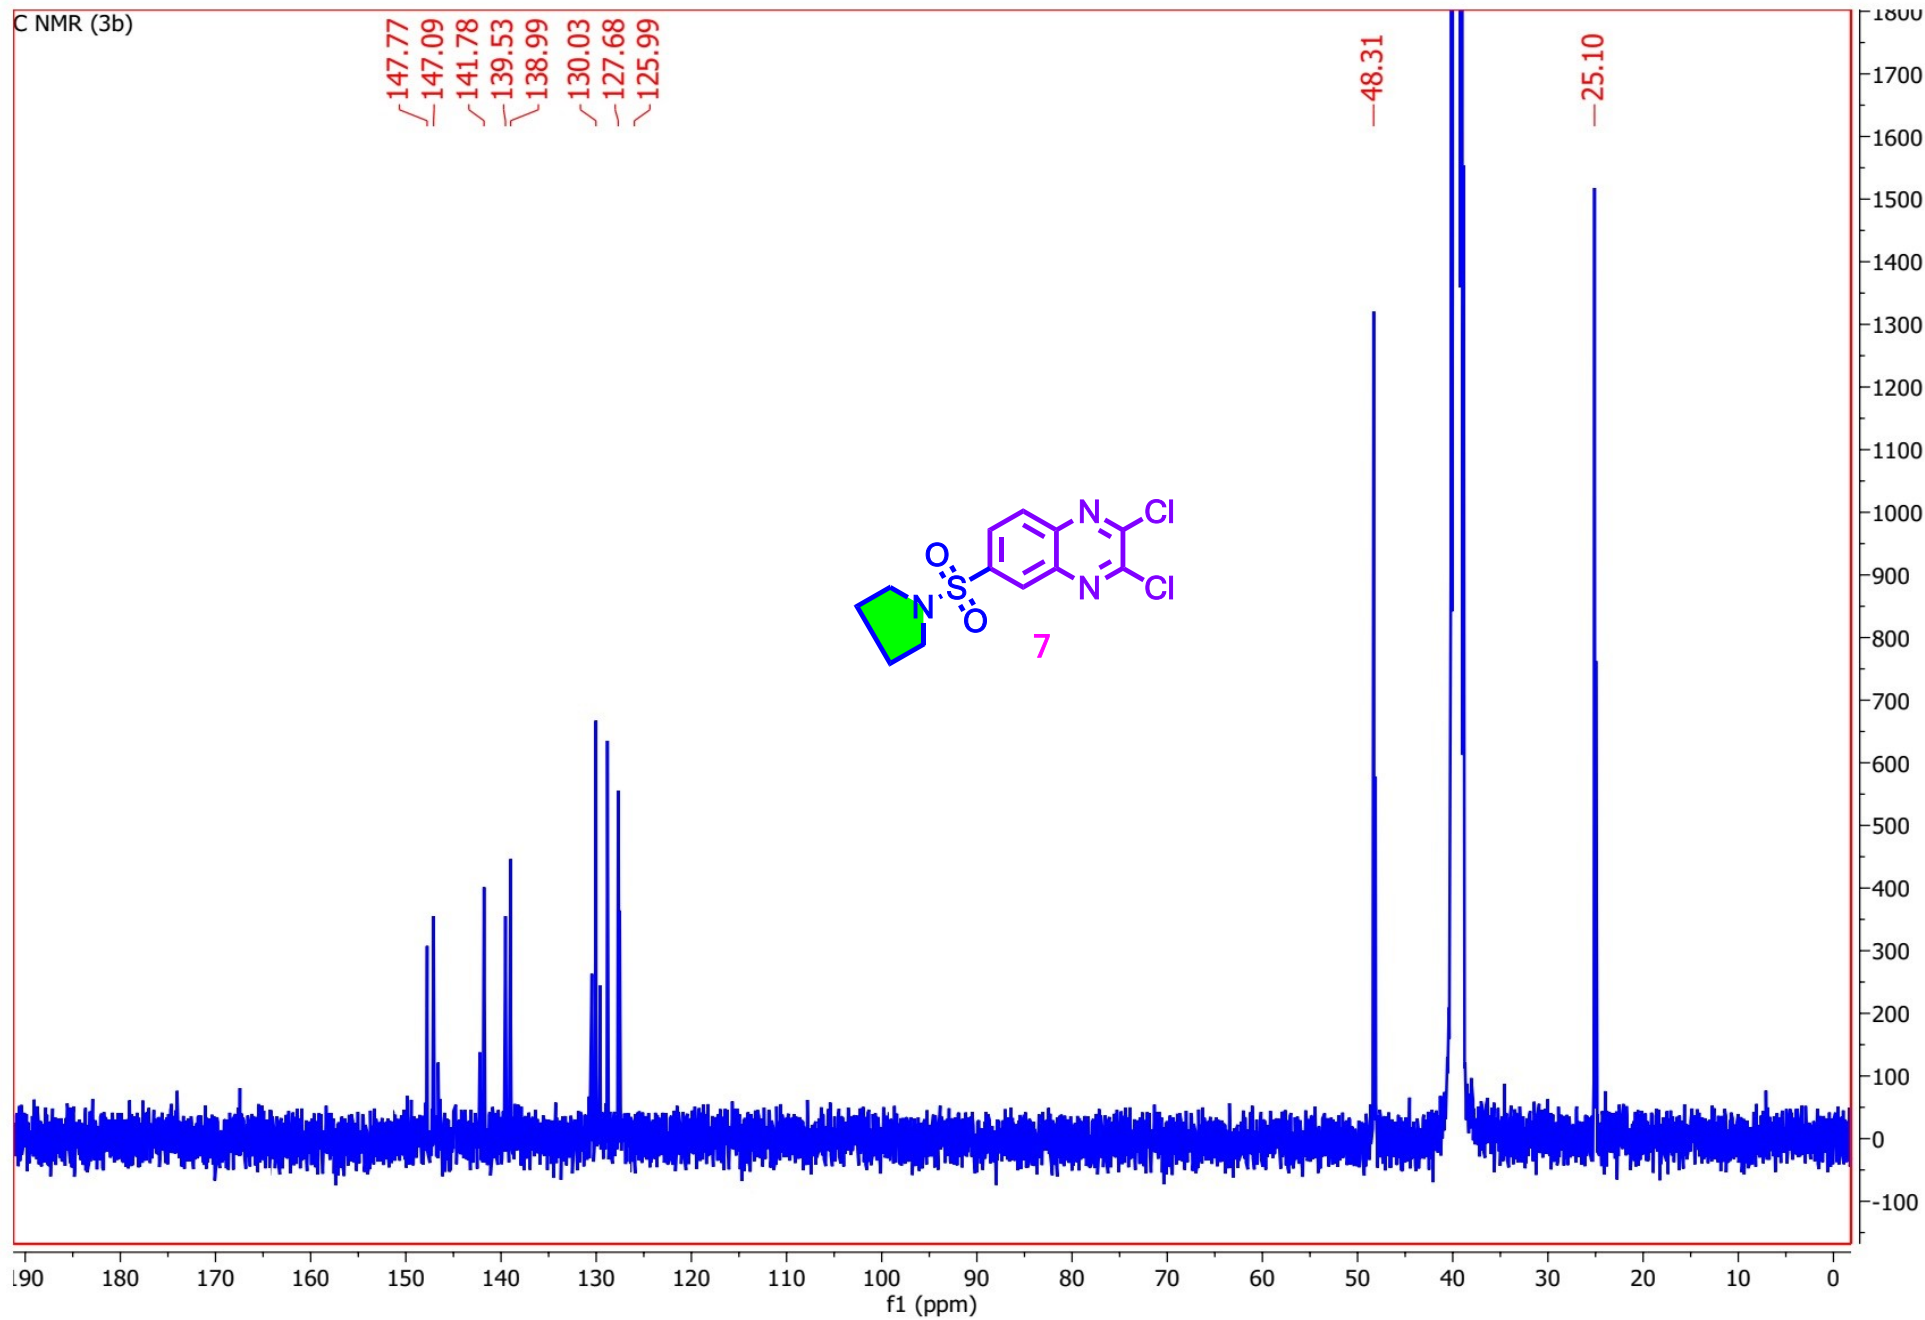

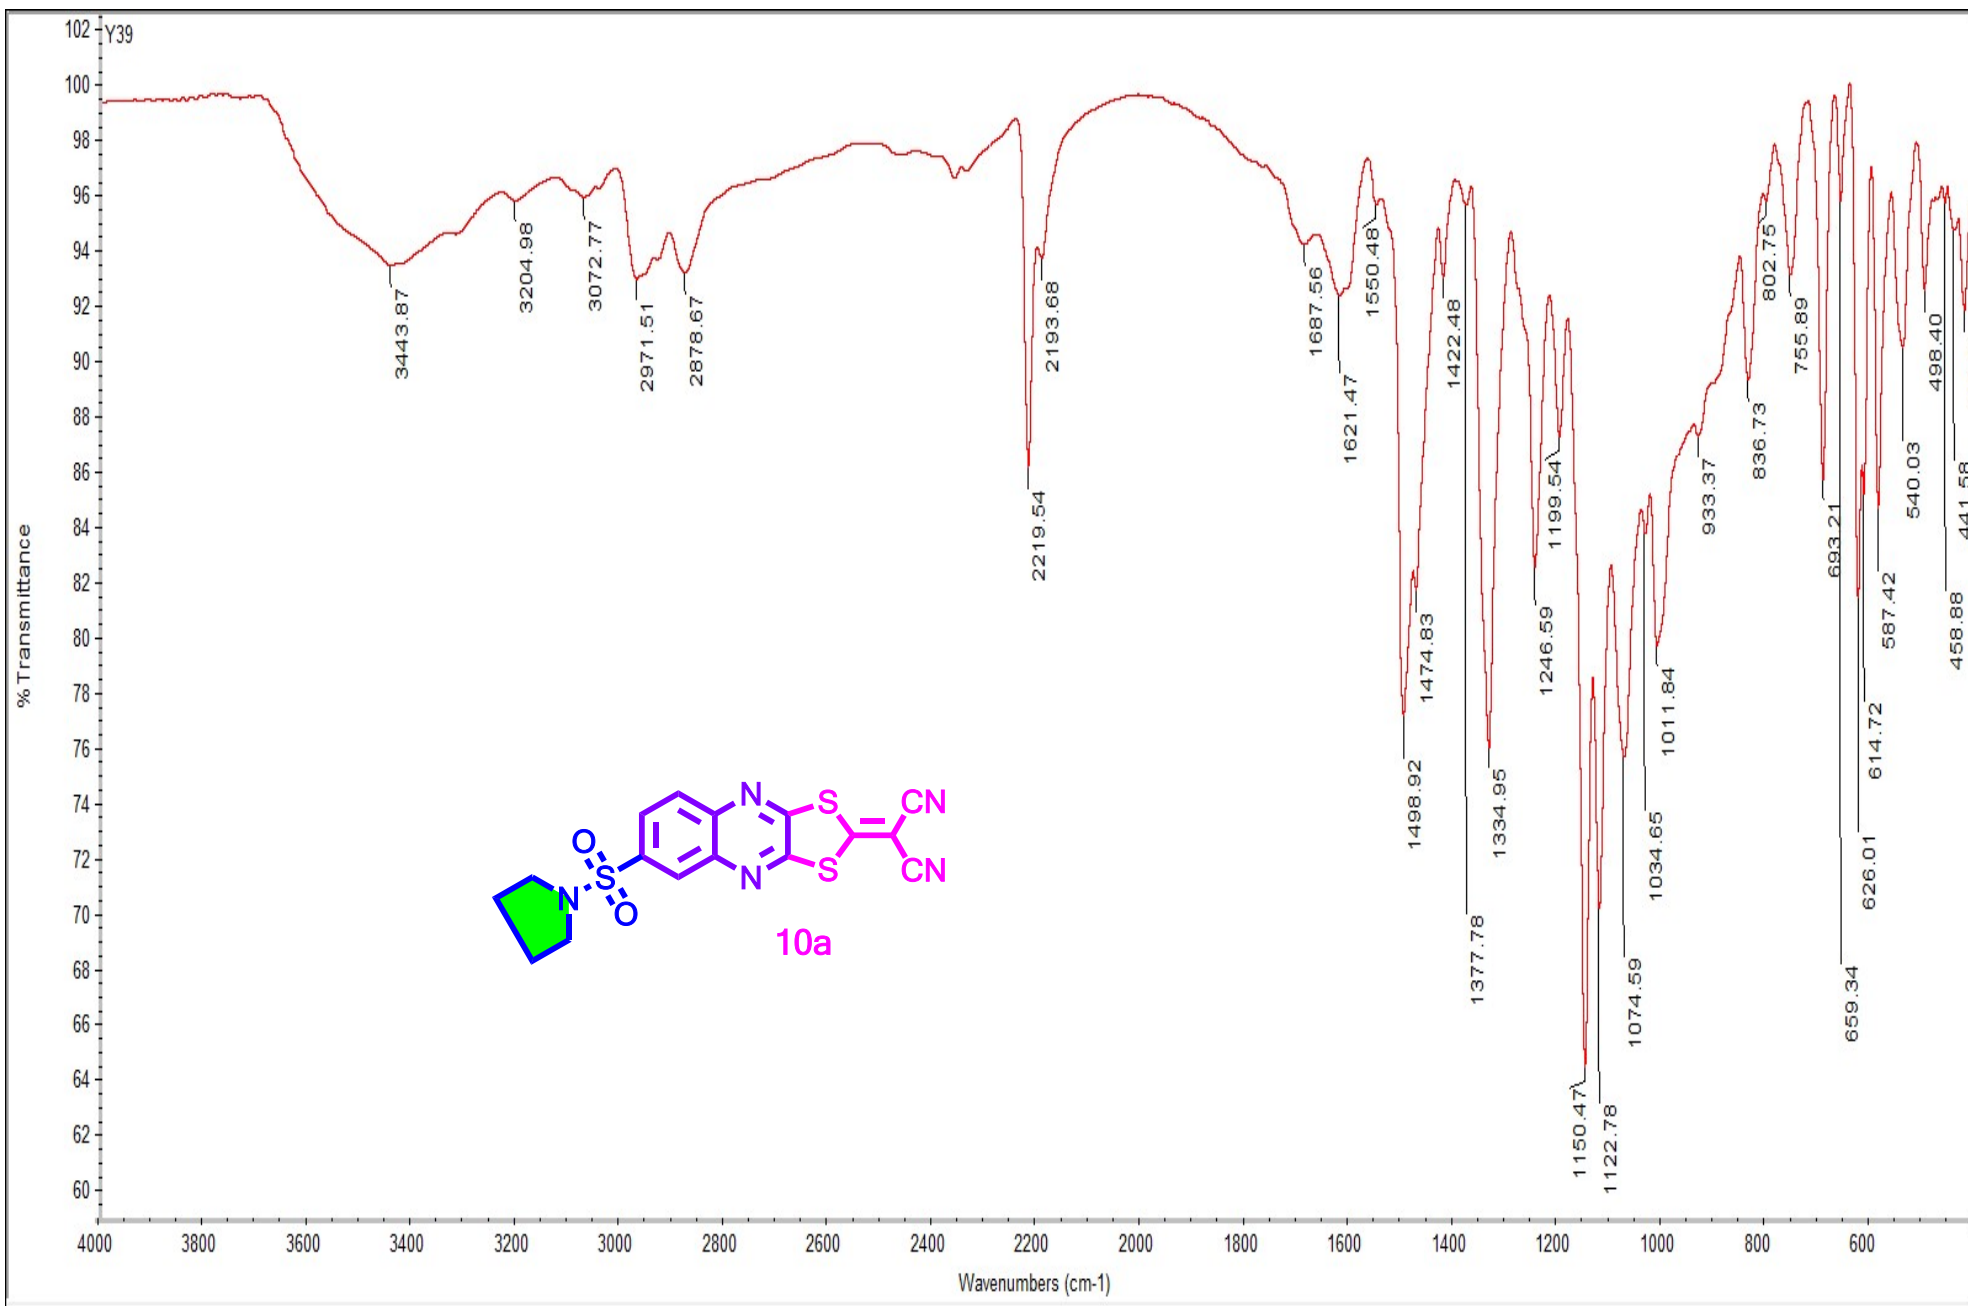

**H NMR (6)**

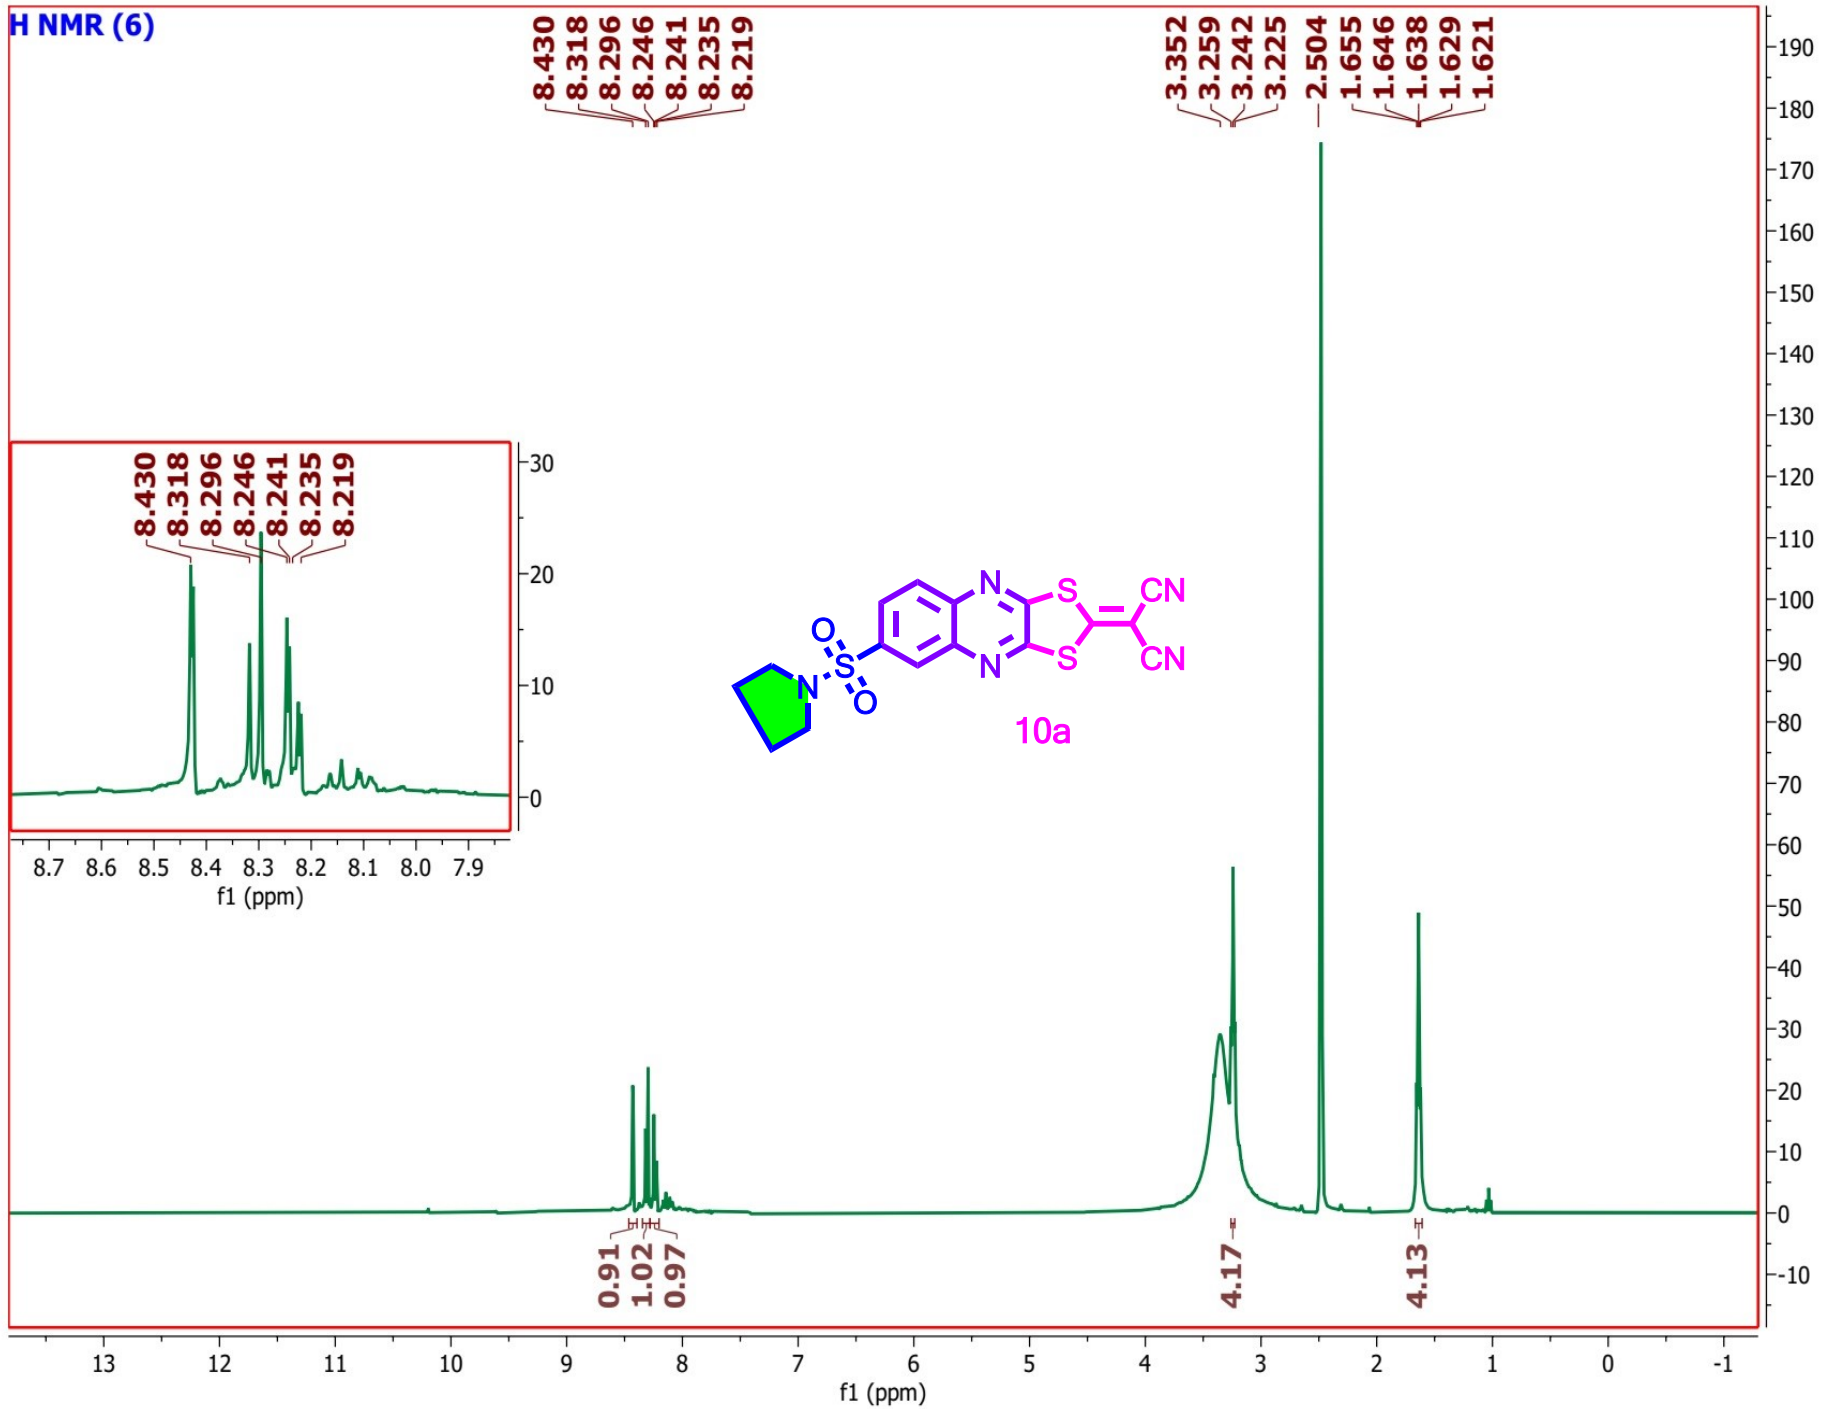

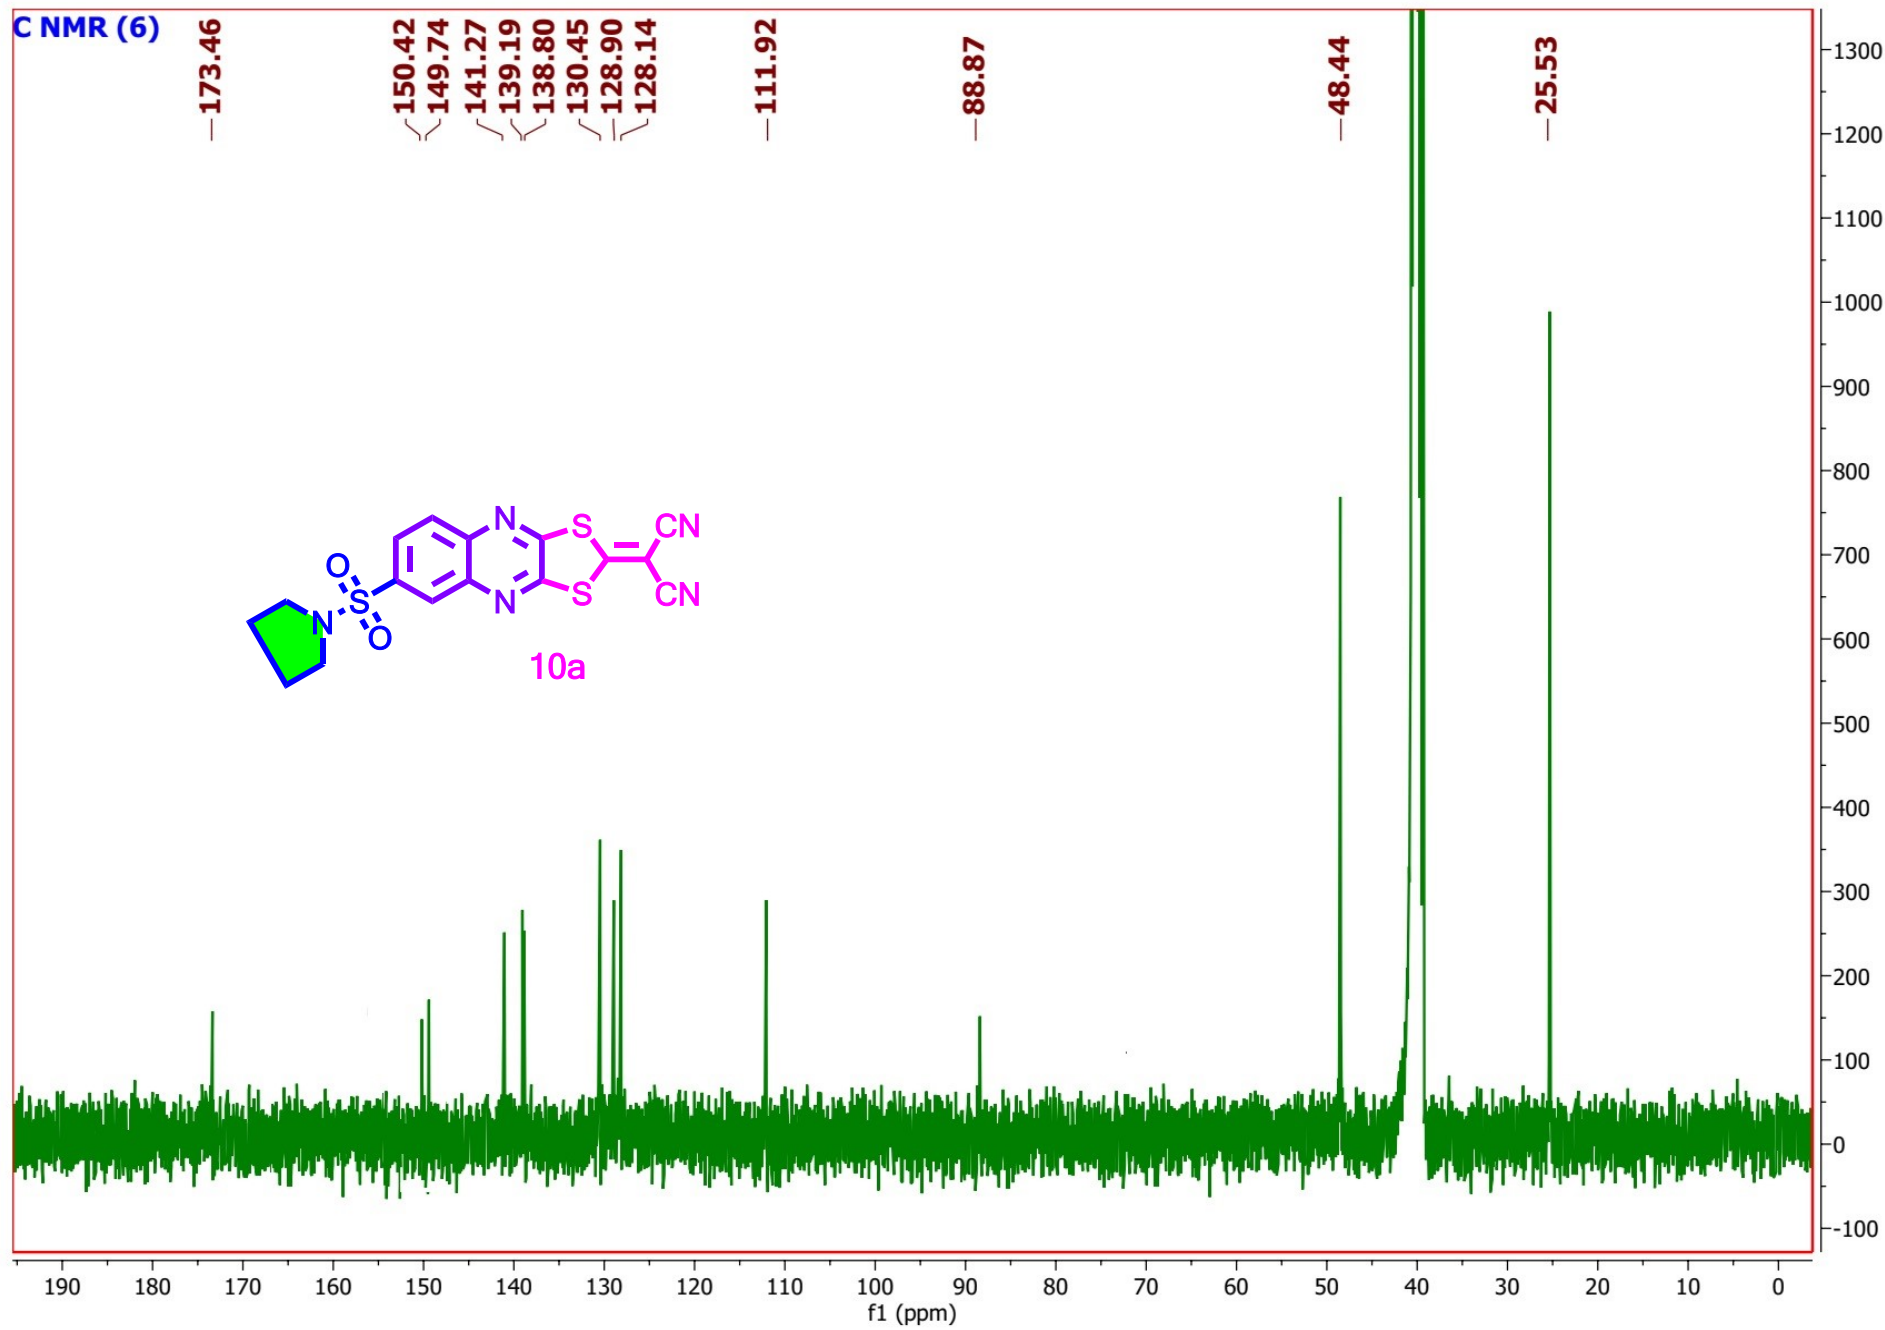

Time (min)

ahmed-10a#43 RT: 0.74 AV: 1 SB: 28 1.21-1.34 , 0.87-1.14 NL: 5.50E2

T: + cEI Full ms [40.00-1000.00]

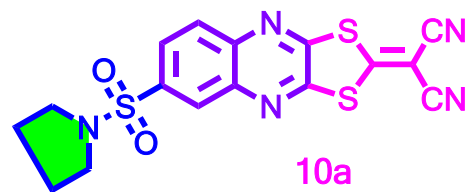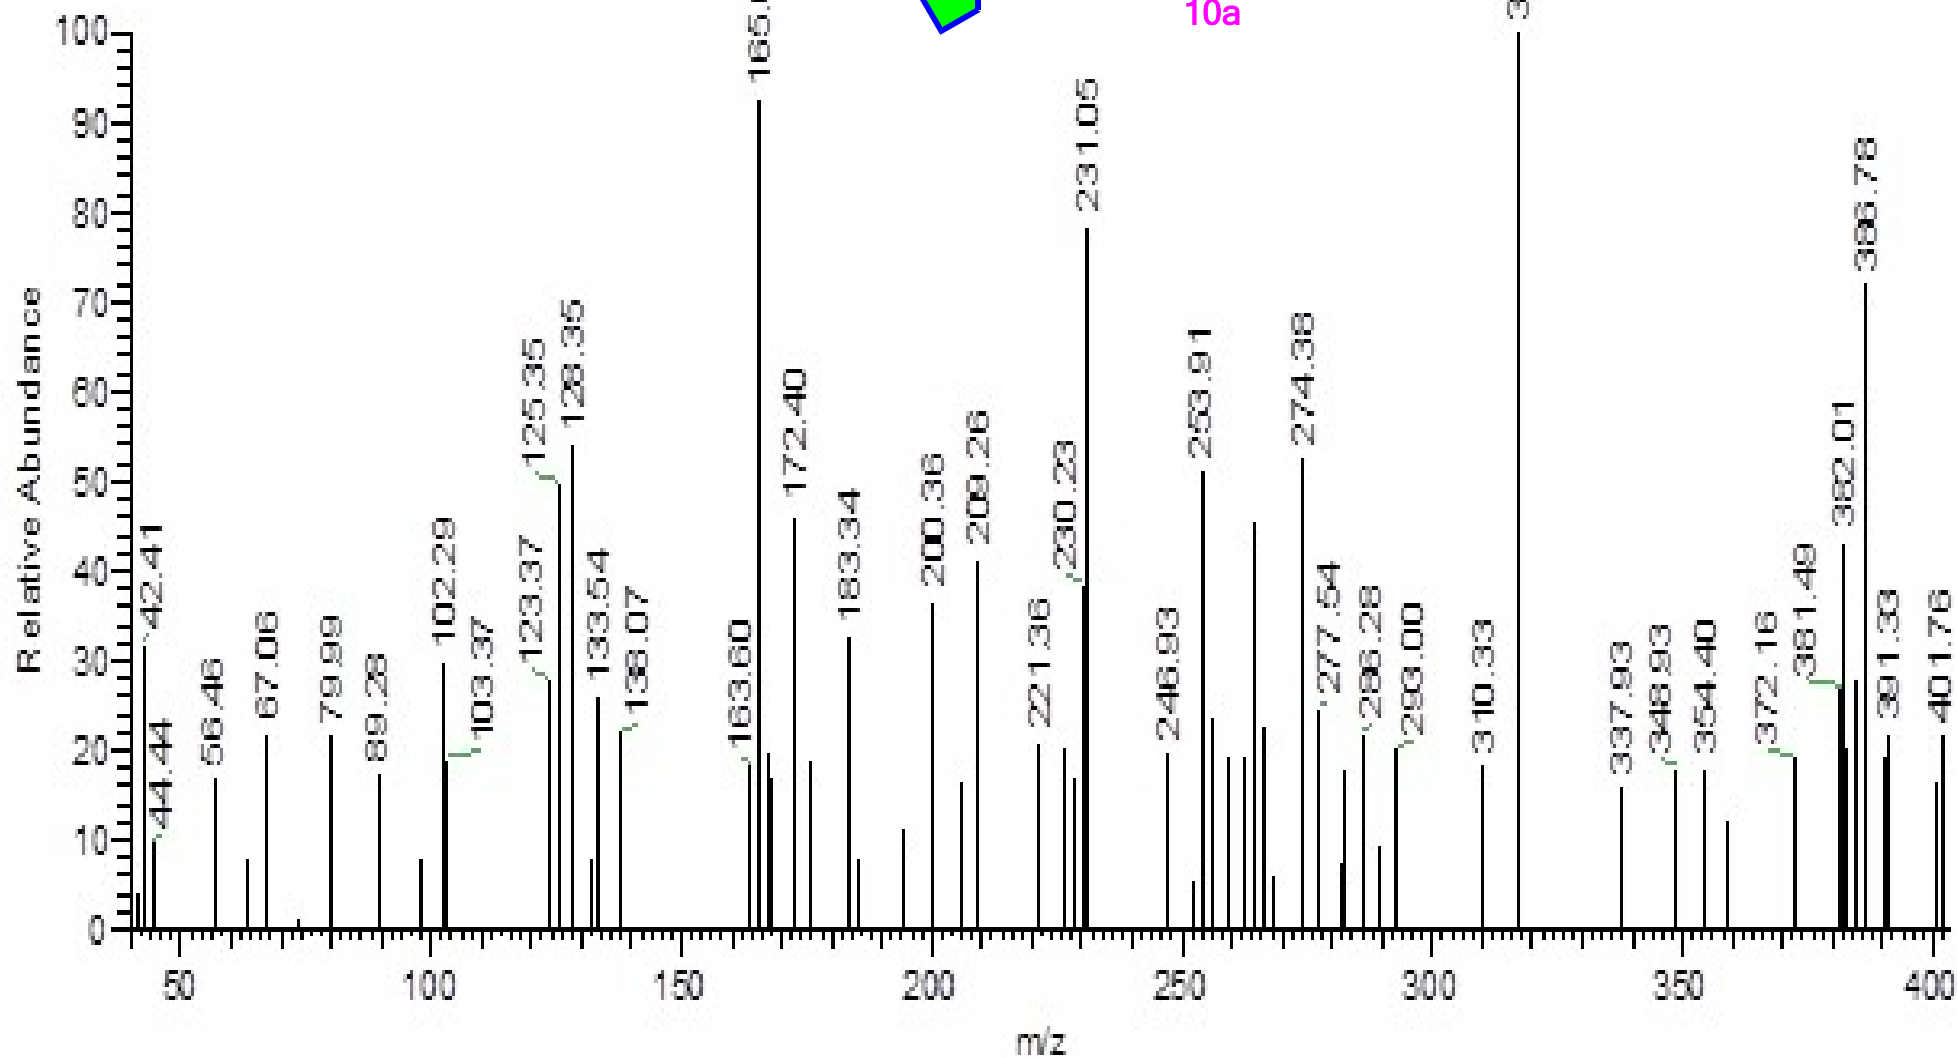

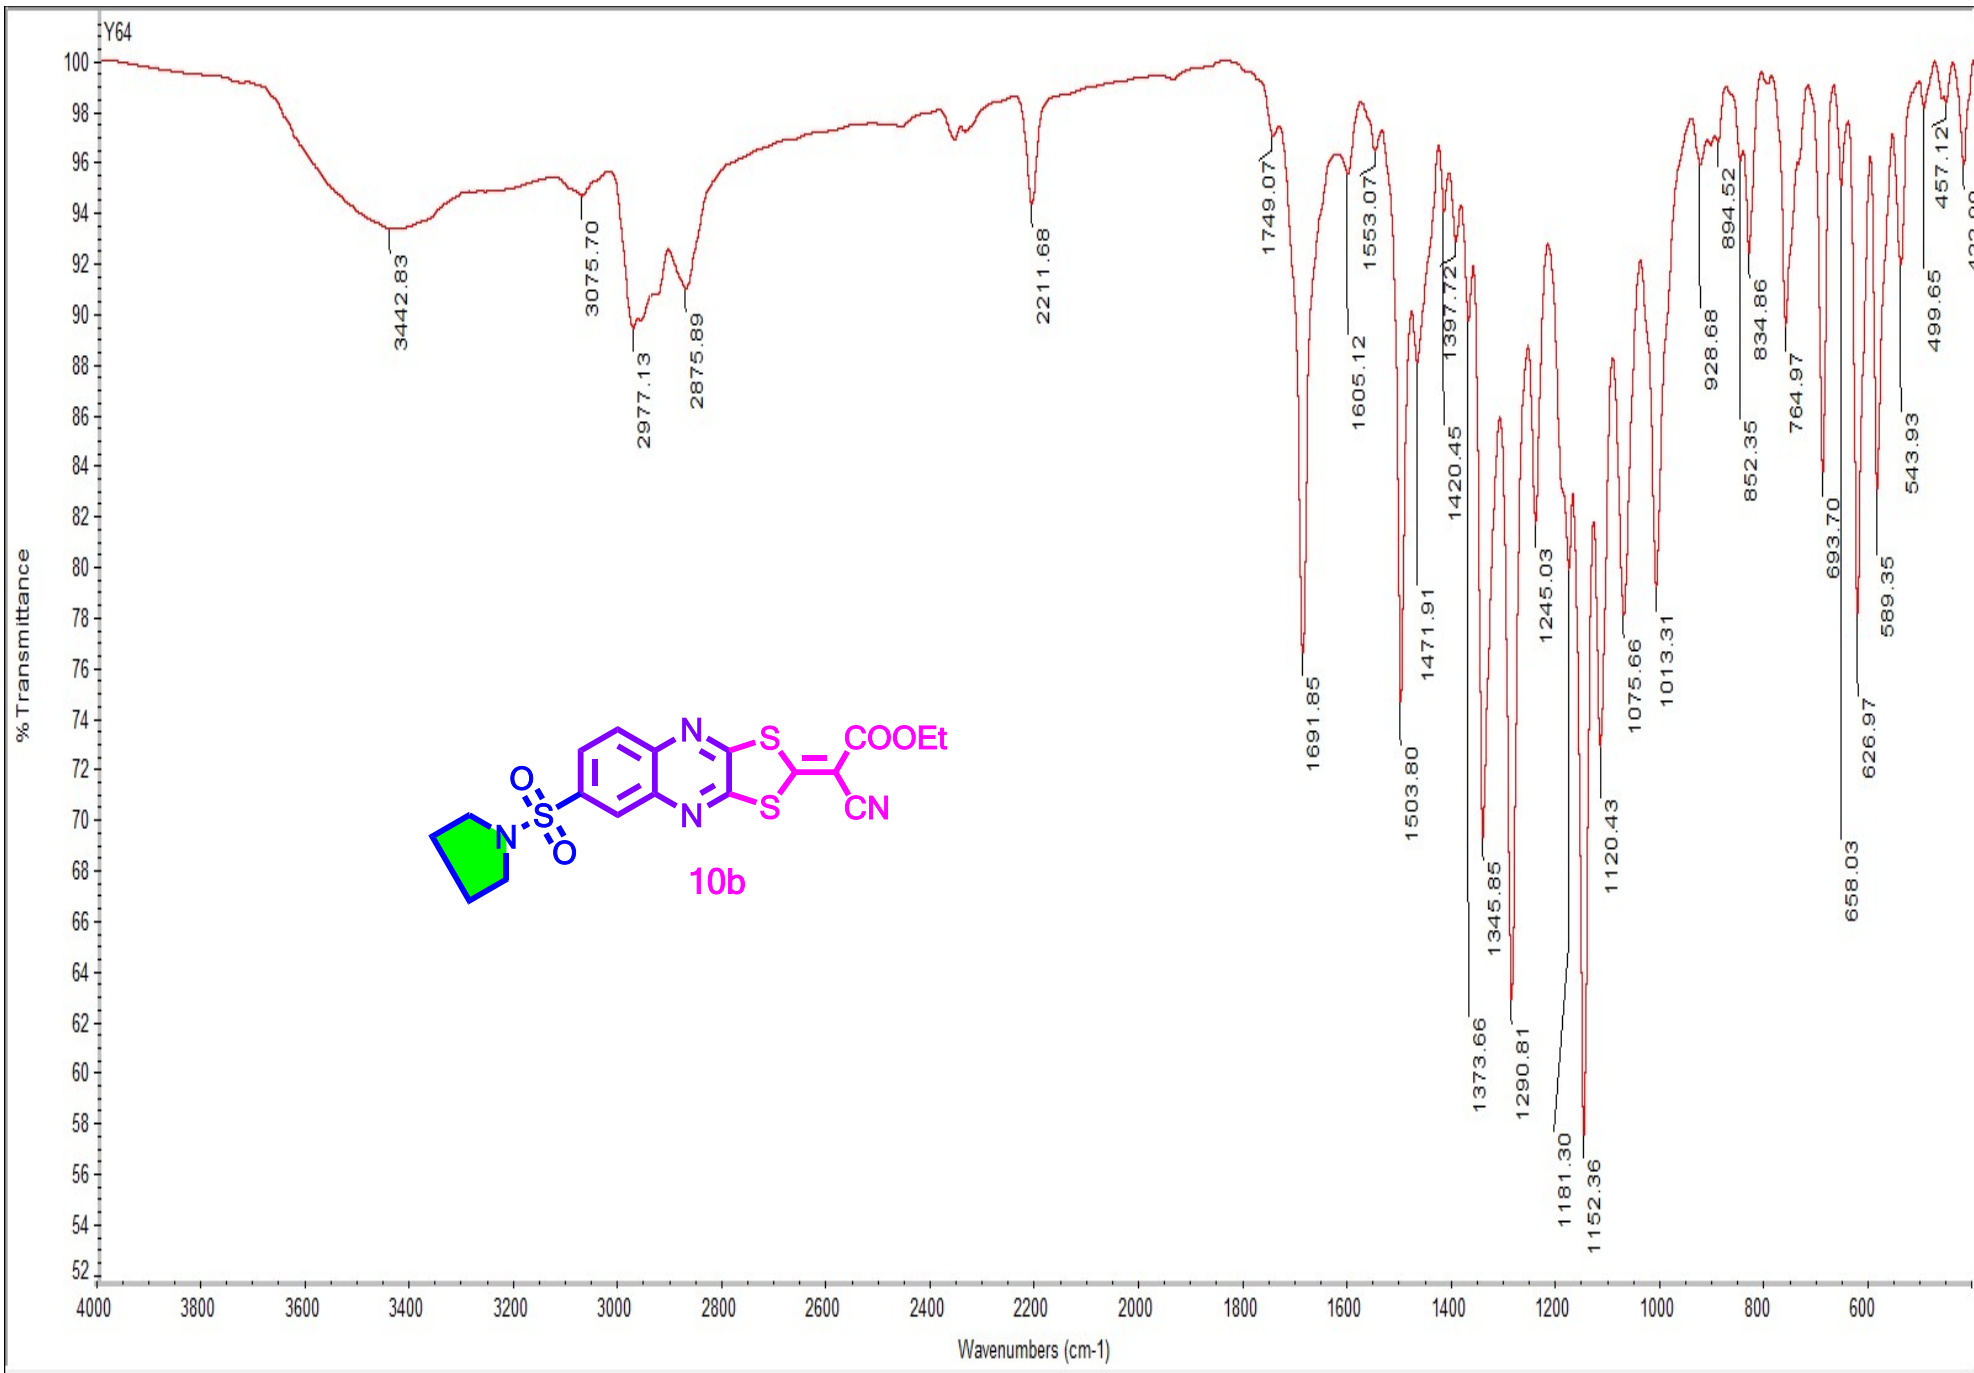

# H NMR (5)

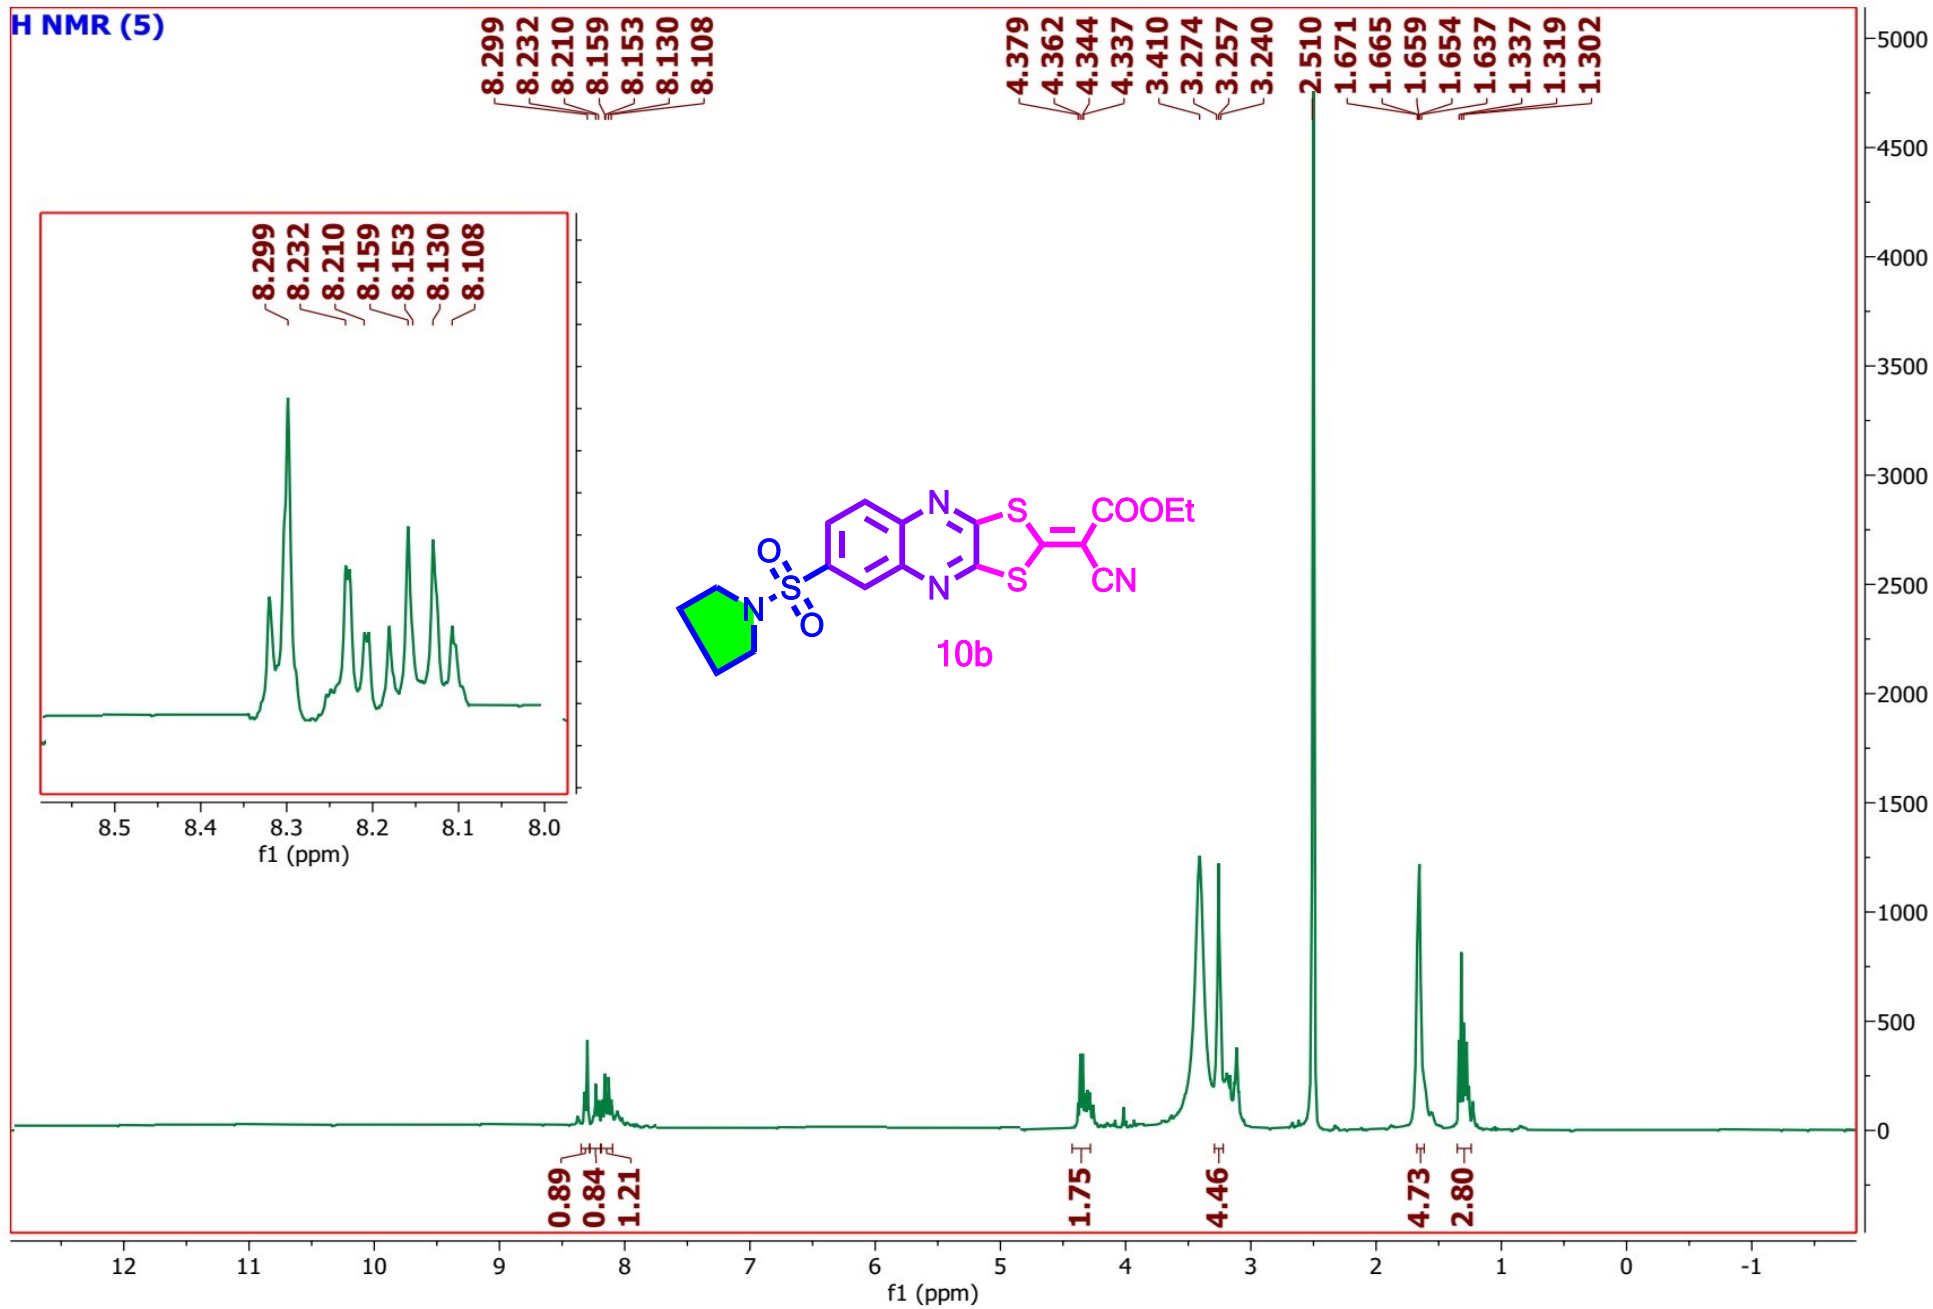



C NMR (5)

167.57  
165.86

151.26  
149.95

138.16  
137.17  
136.68

126.40  
125.06  
122.33

114.45

92.39

62.72

48.17

24.94

14.02

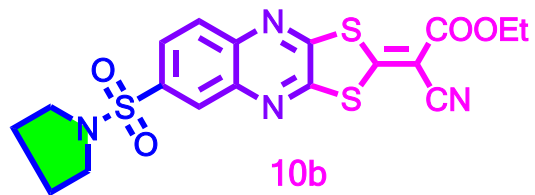

10b

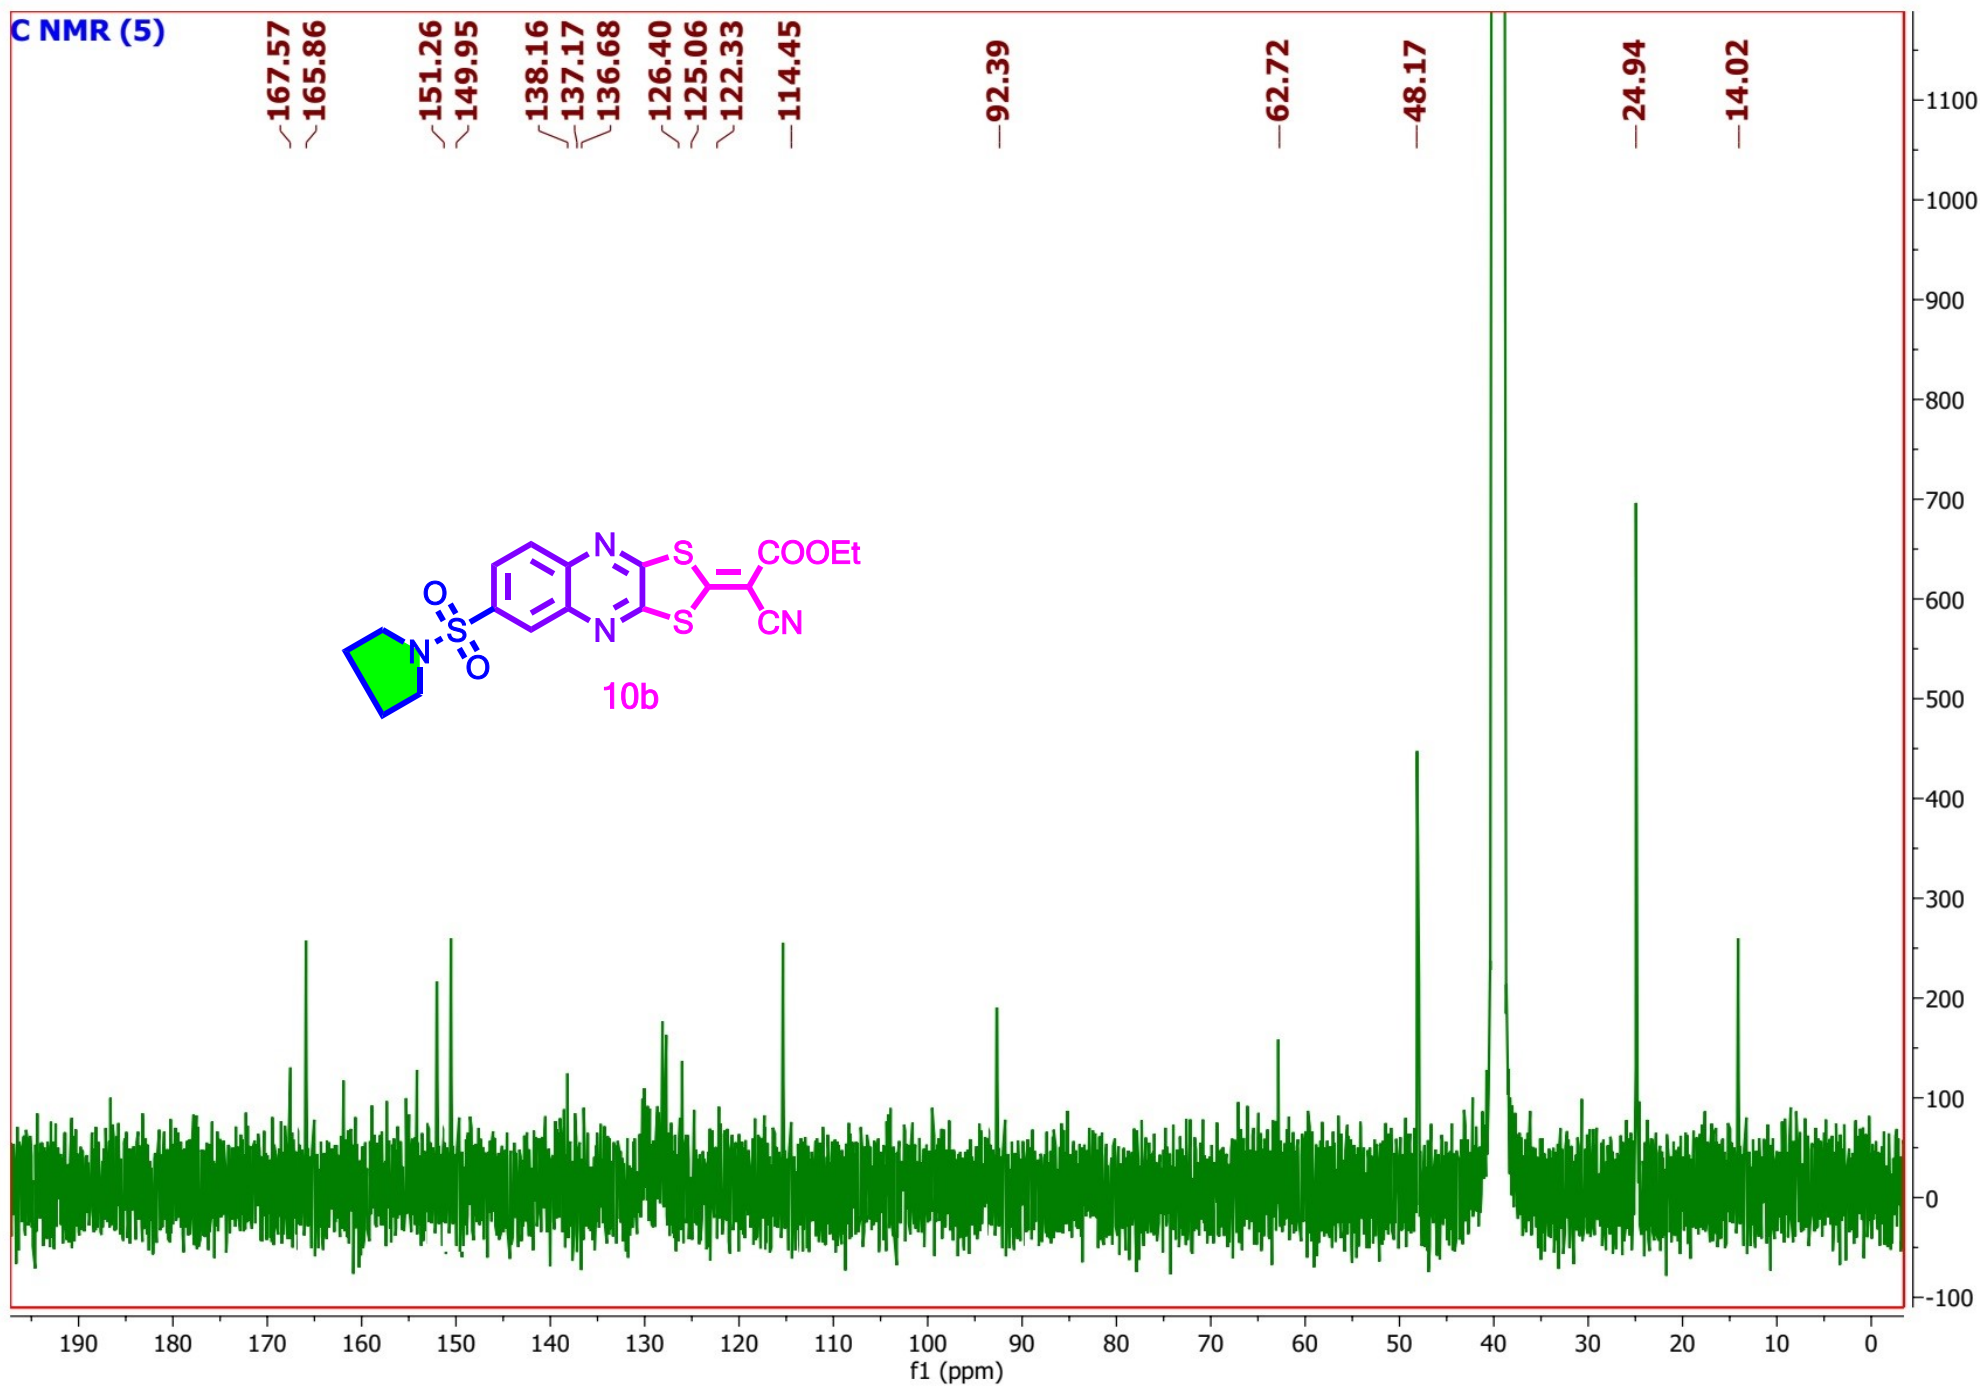

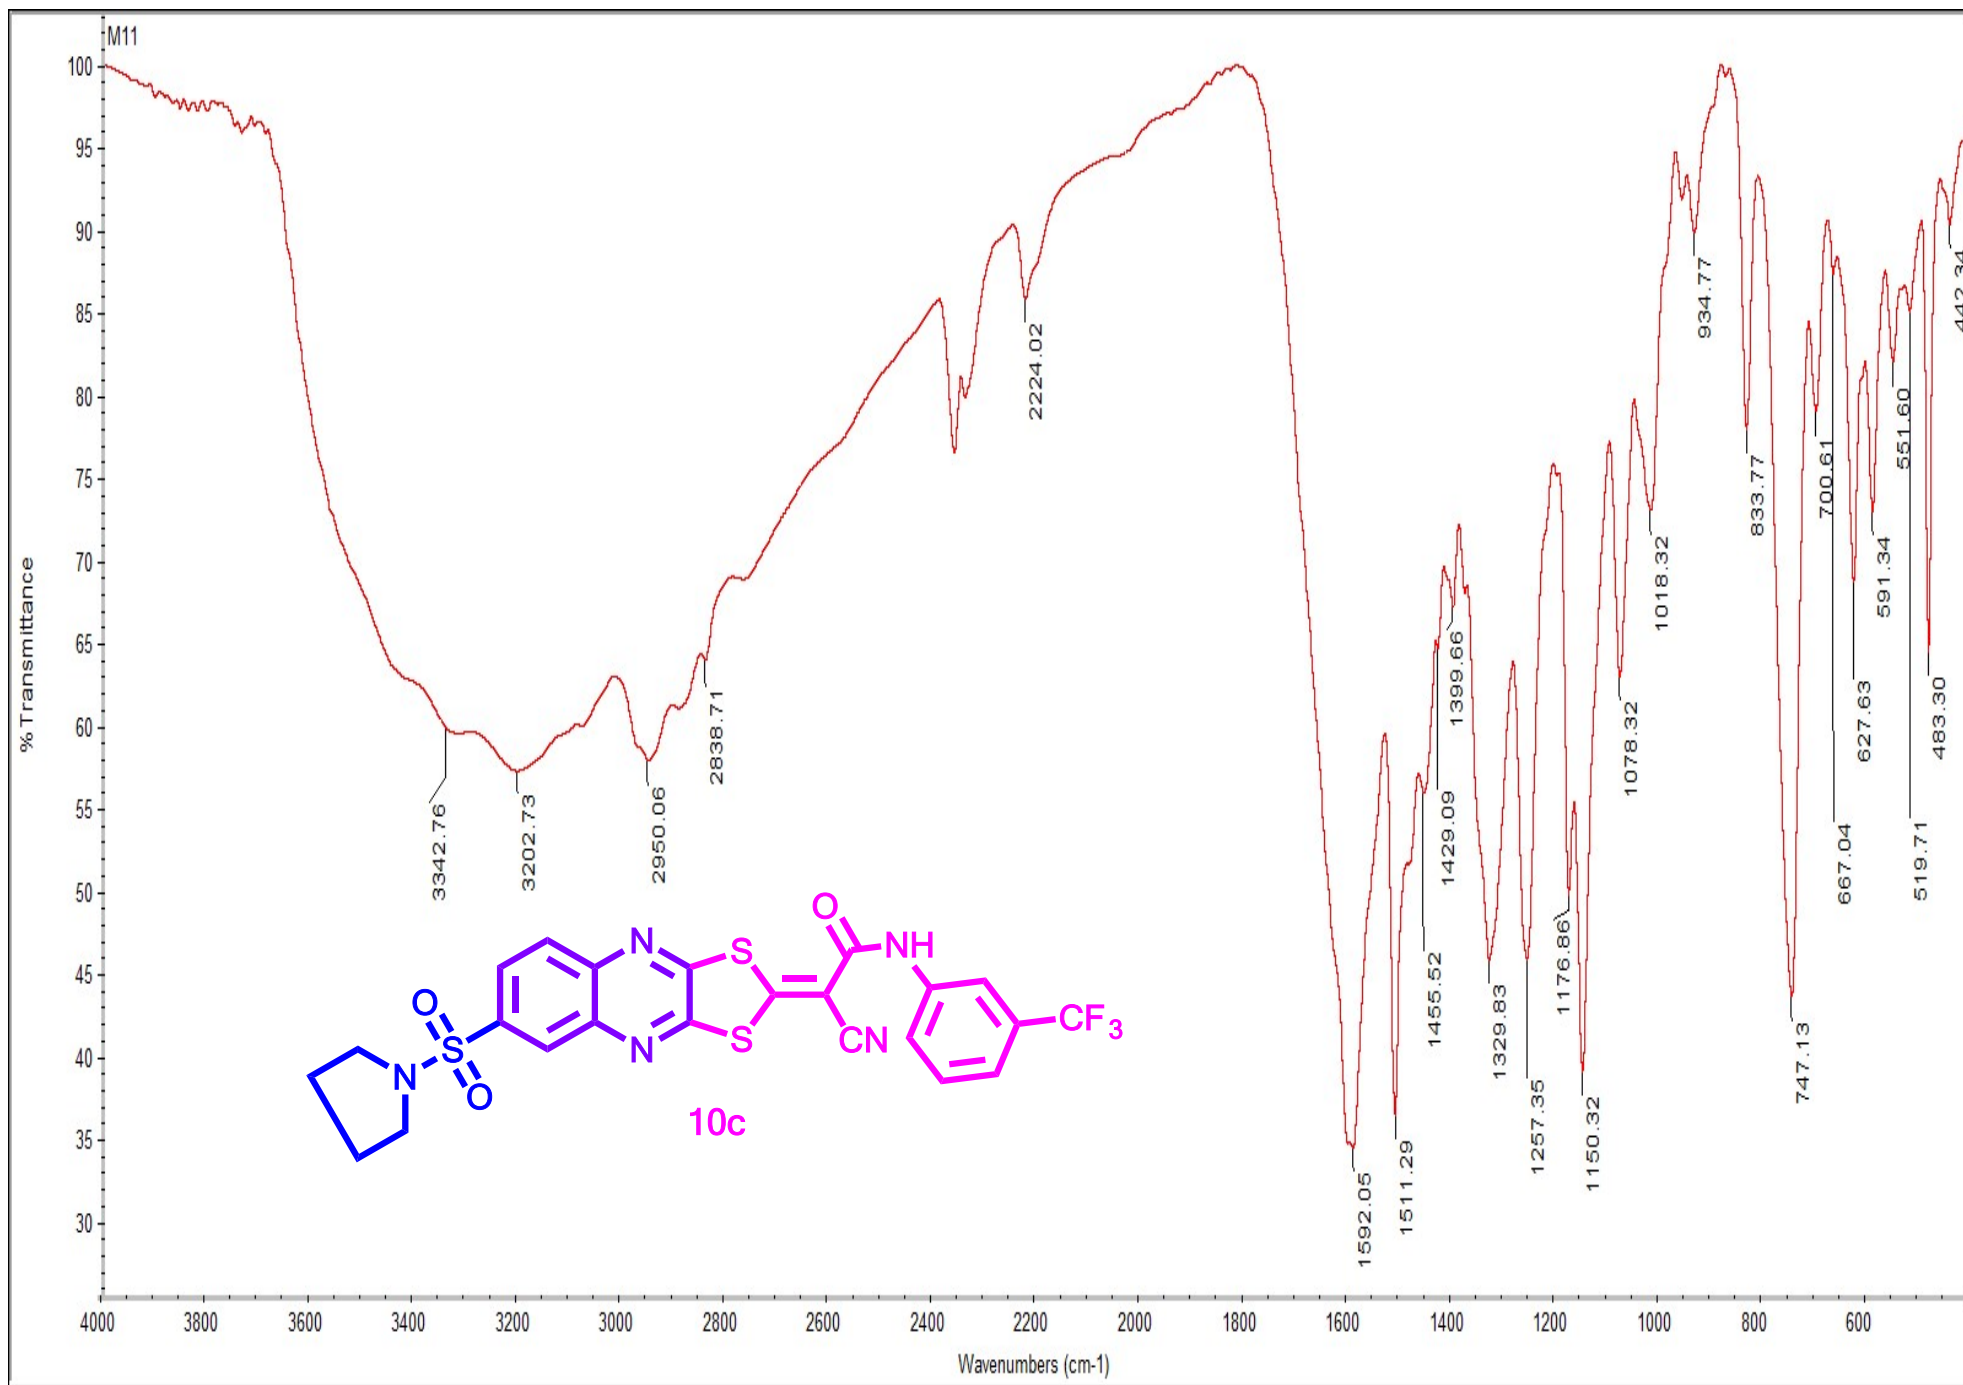

**H NMR (7b)**

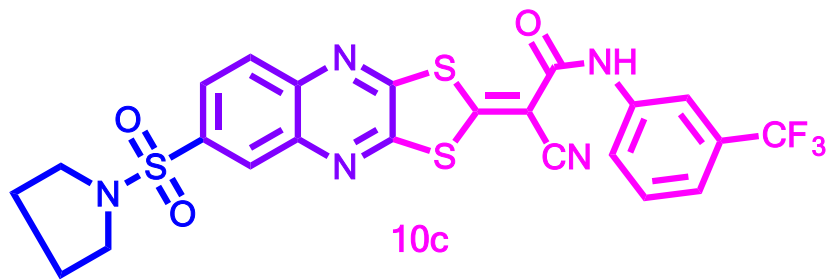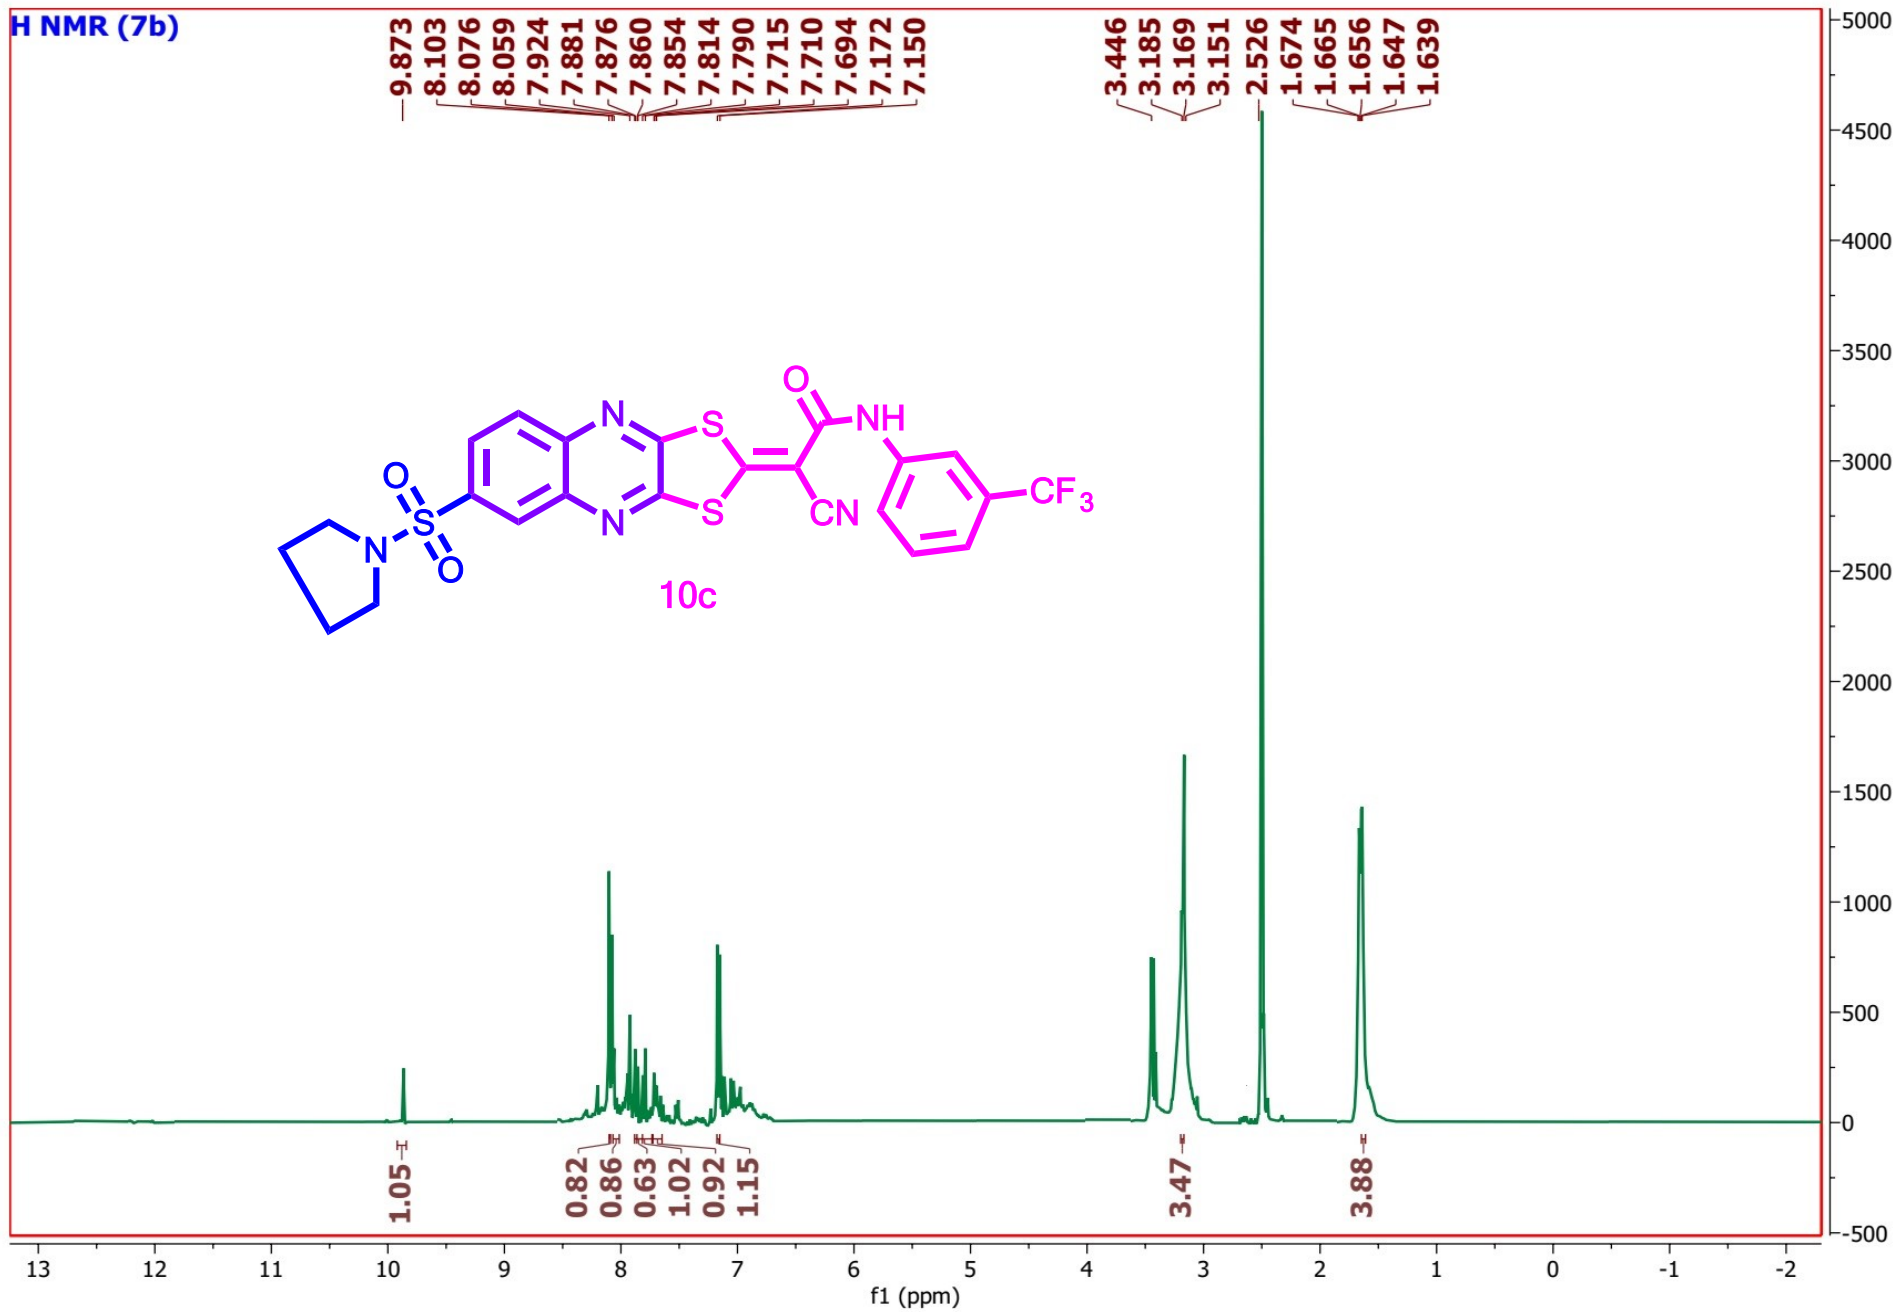

C NMR (7b)

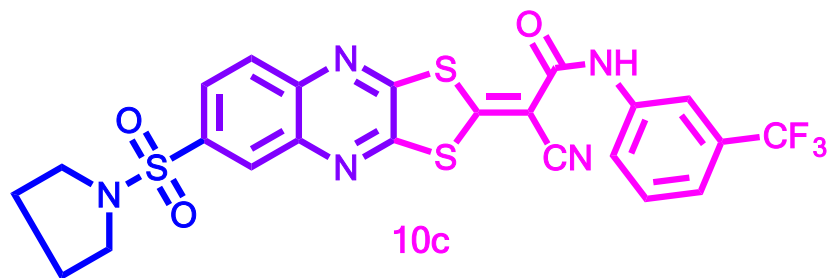

170.67  
163.44  
151.42  
151.23  
139.30  
137.92  
136.58  
134.04  
133.40  
132.89  
129.66  
127.37  
125.57  
124.65  
123.50  
123.37  
115.01

88.27

48.33

24.80

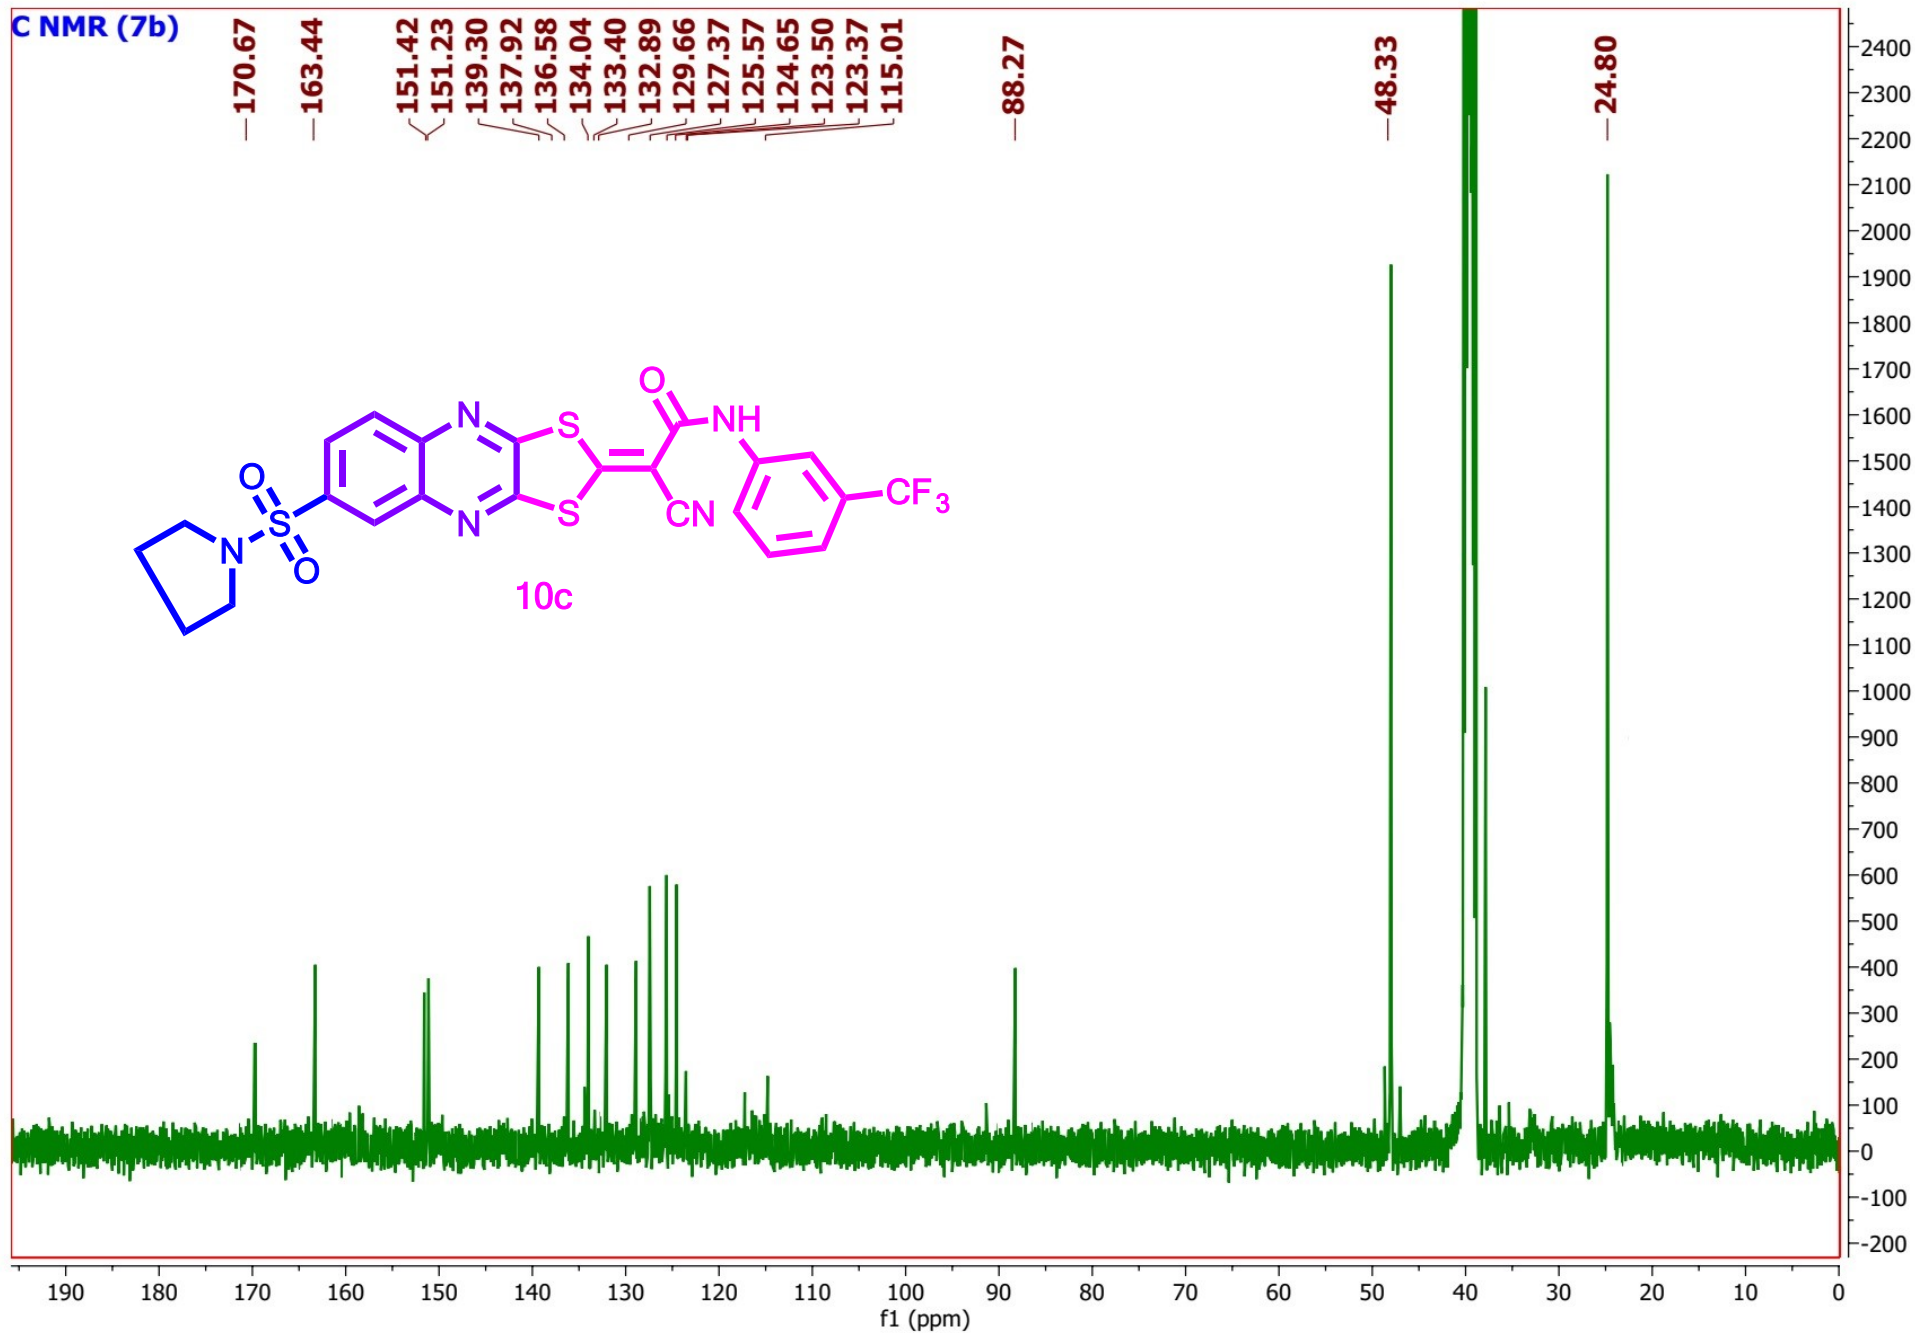

Time (min)

ahmed-10c#100-101 RT: 1.69-1.71 AV: 2 SB: 28 1.21-1.34, 0.87-1.14 NL: 2.12E2  
T: + cEI Full ms [40.00-1000.00]

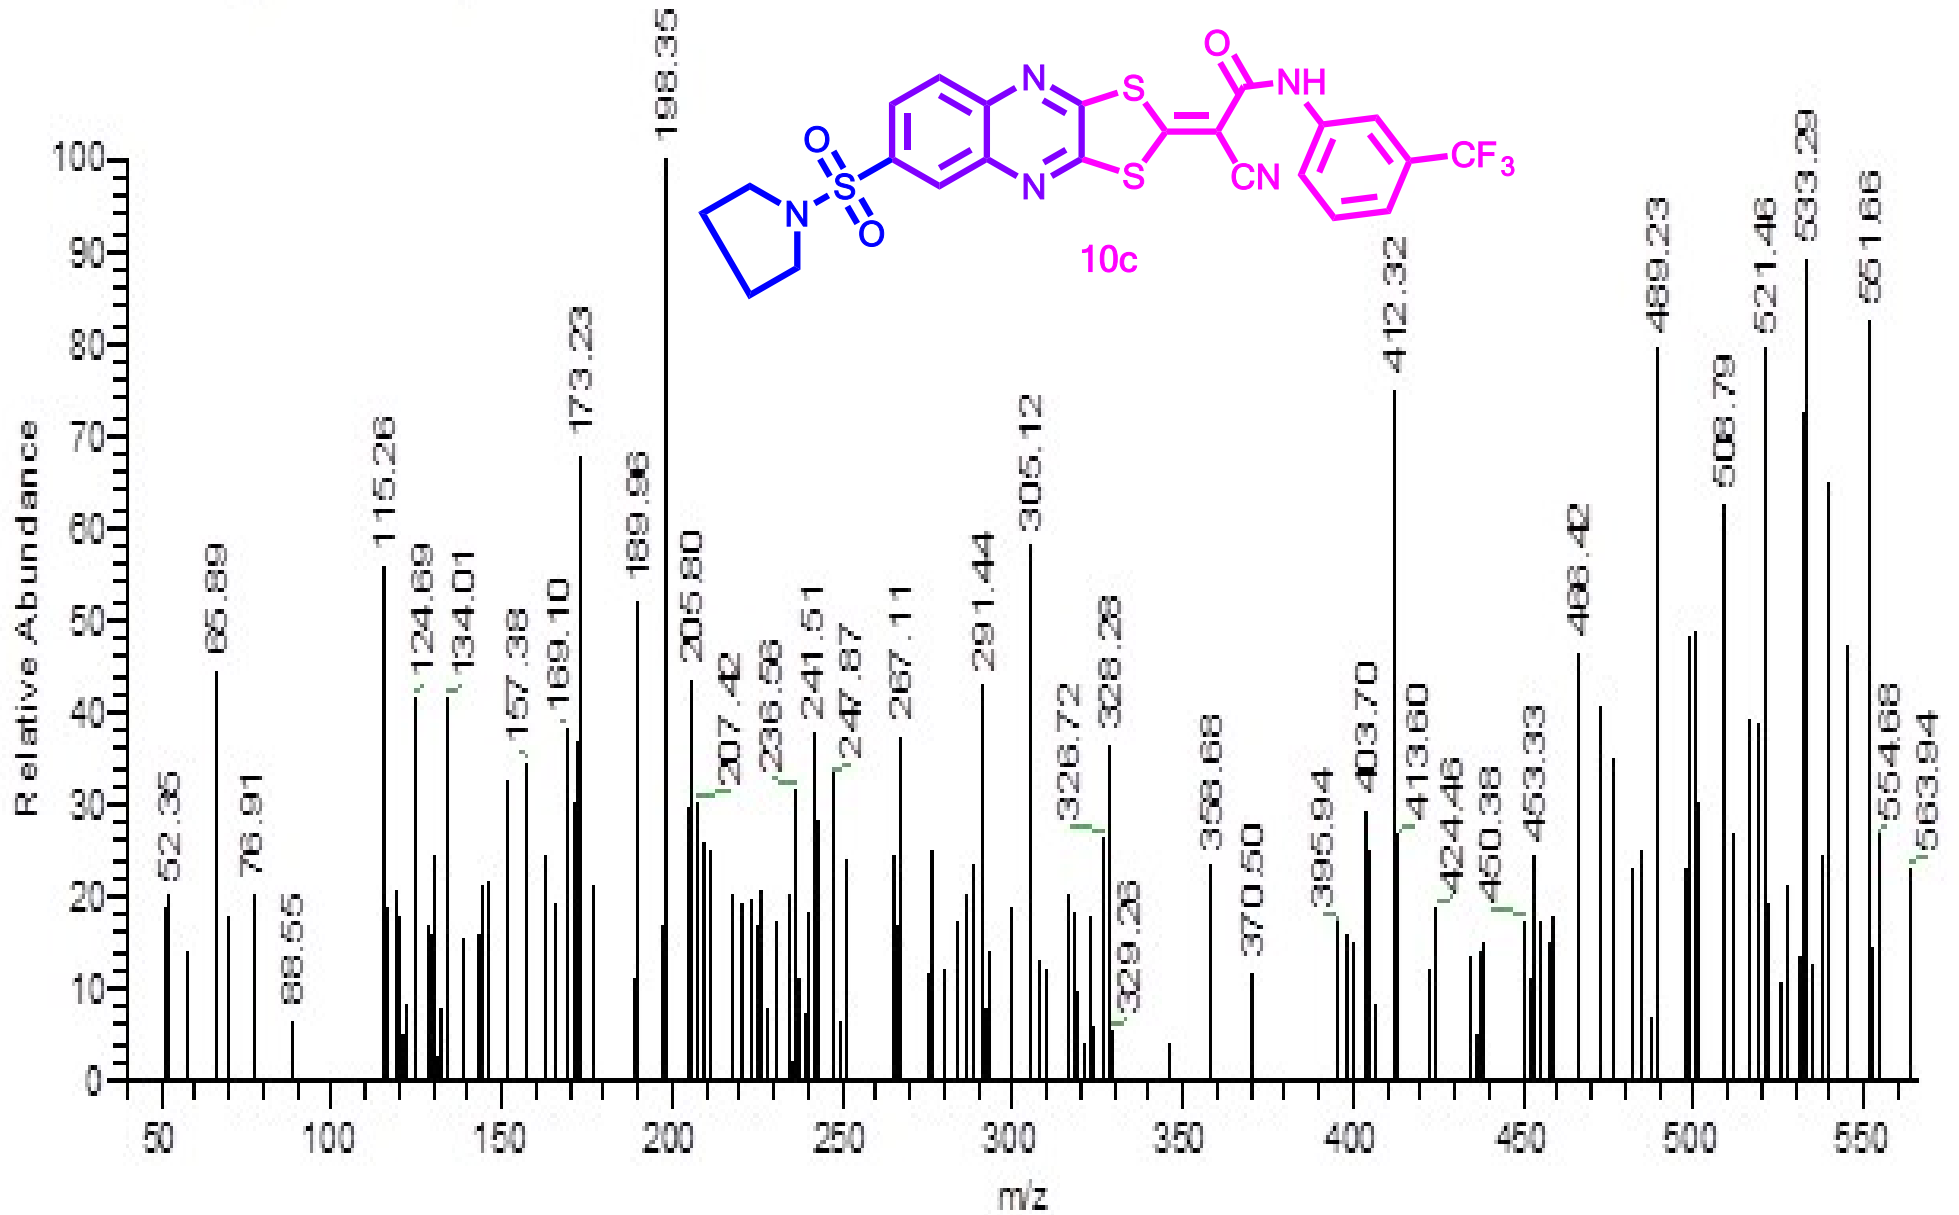

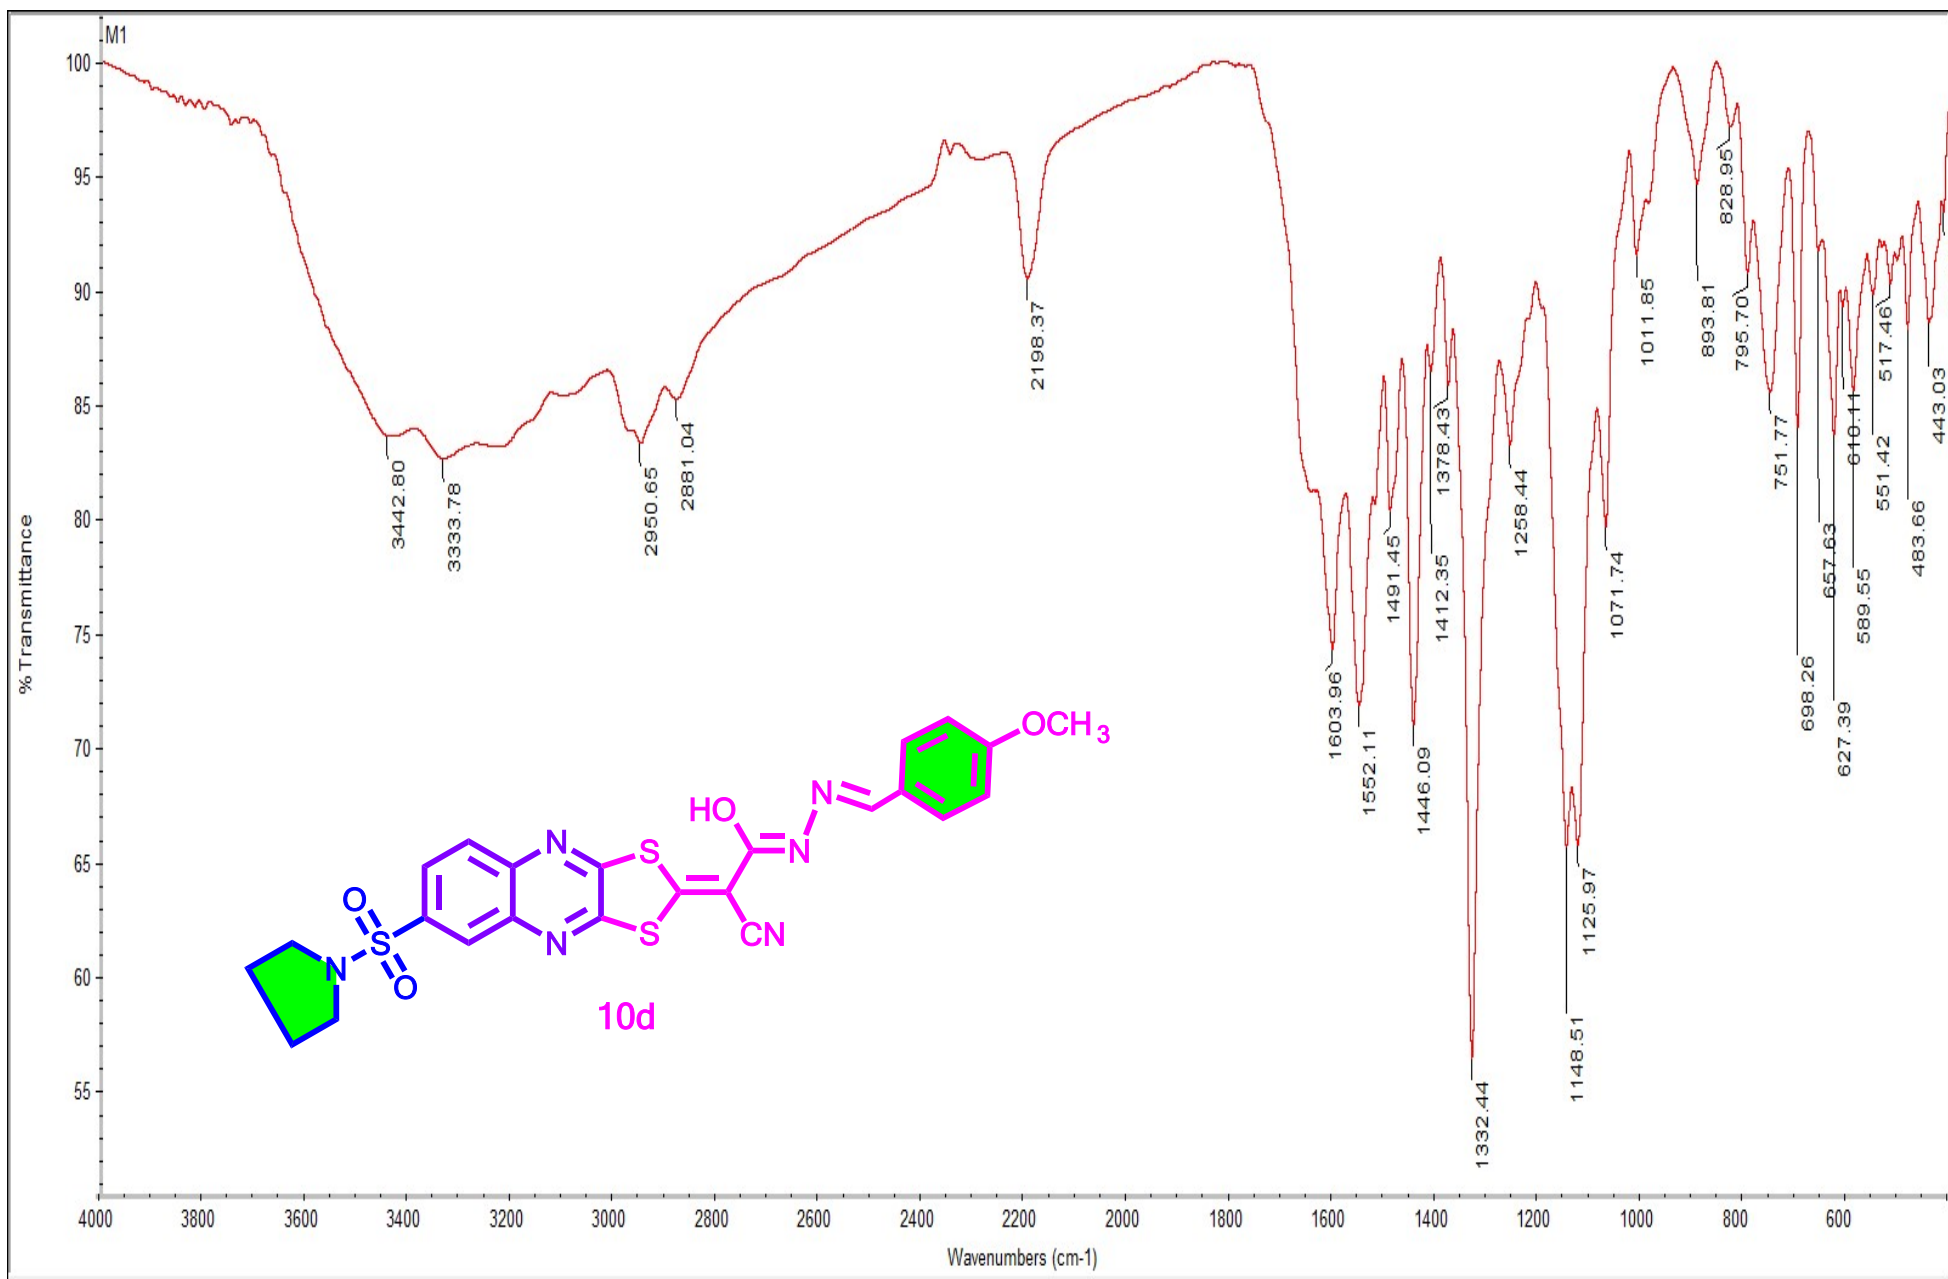

H NMR (8a)

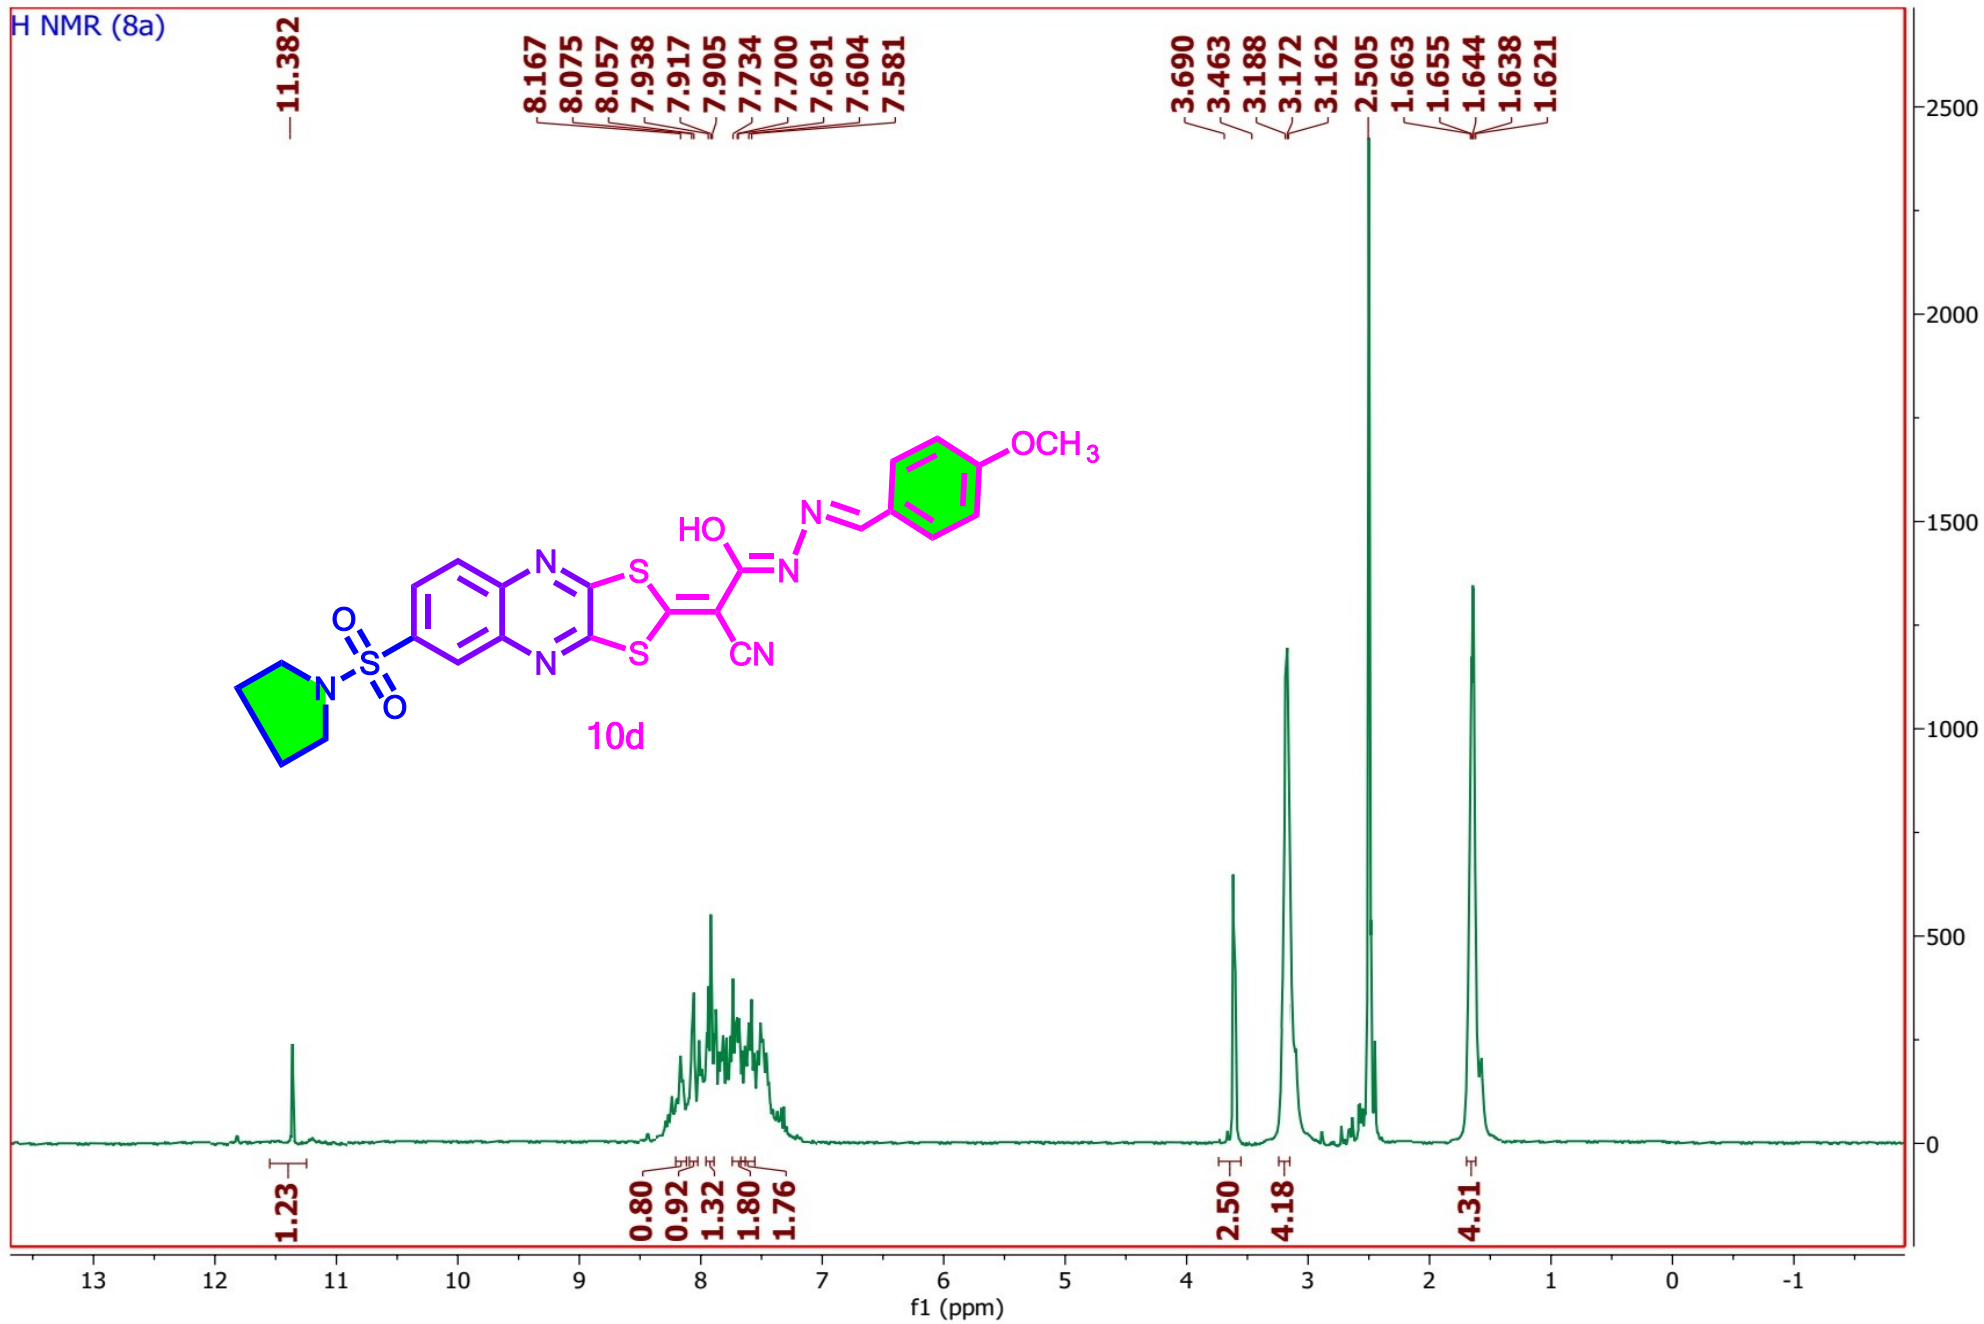

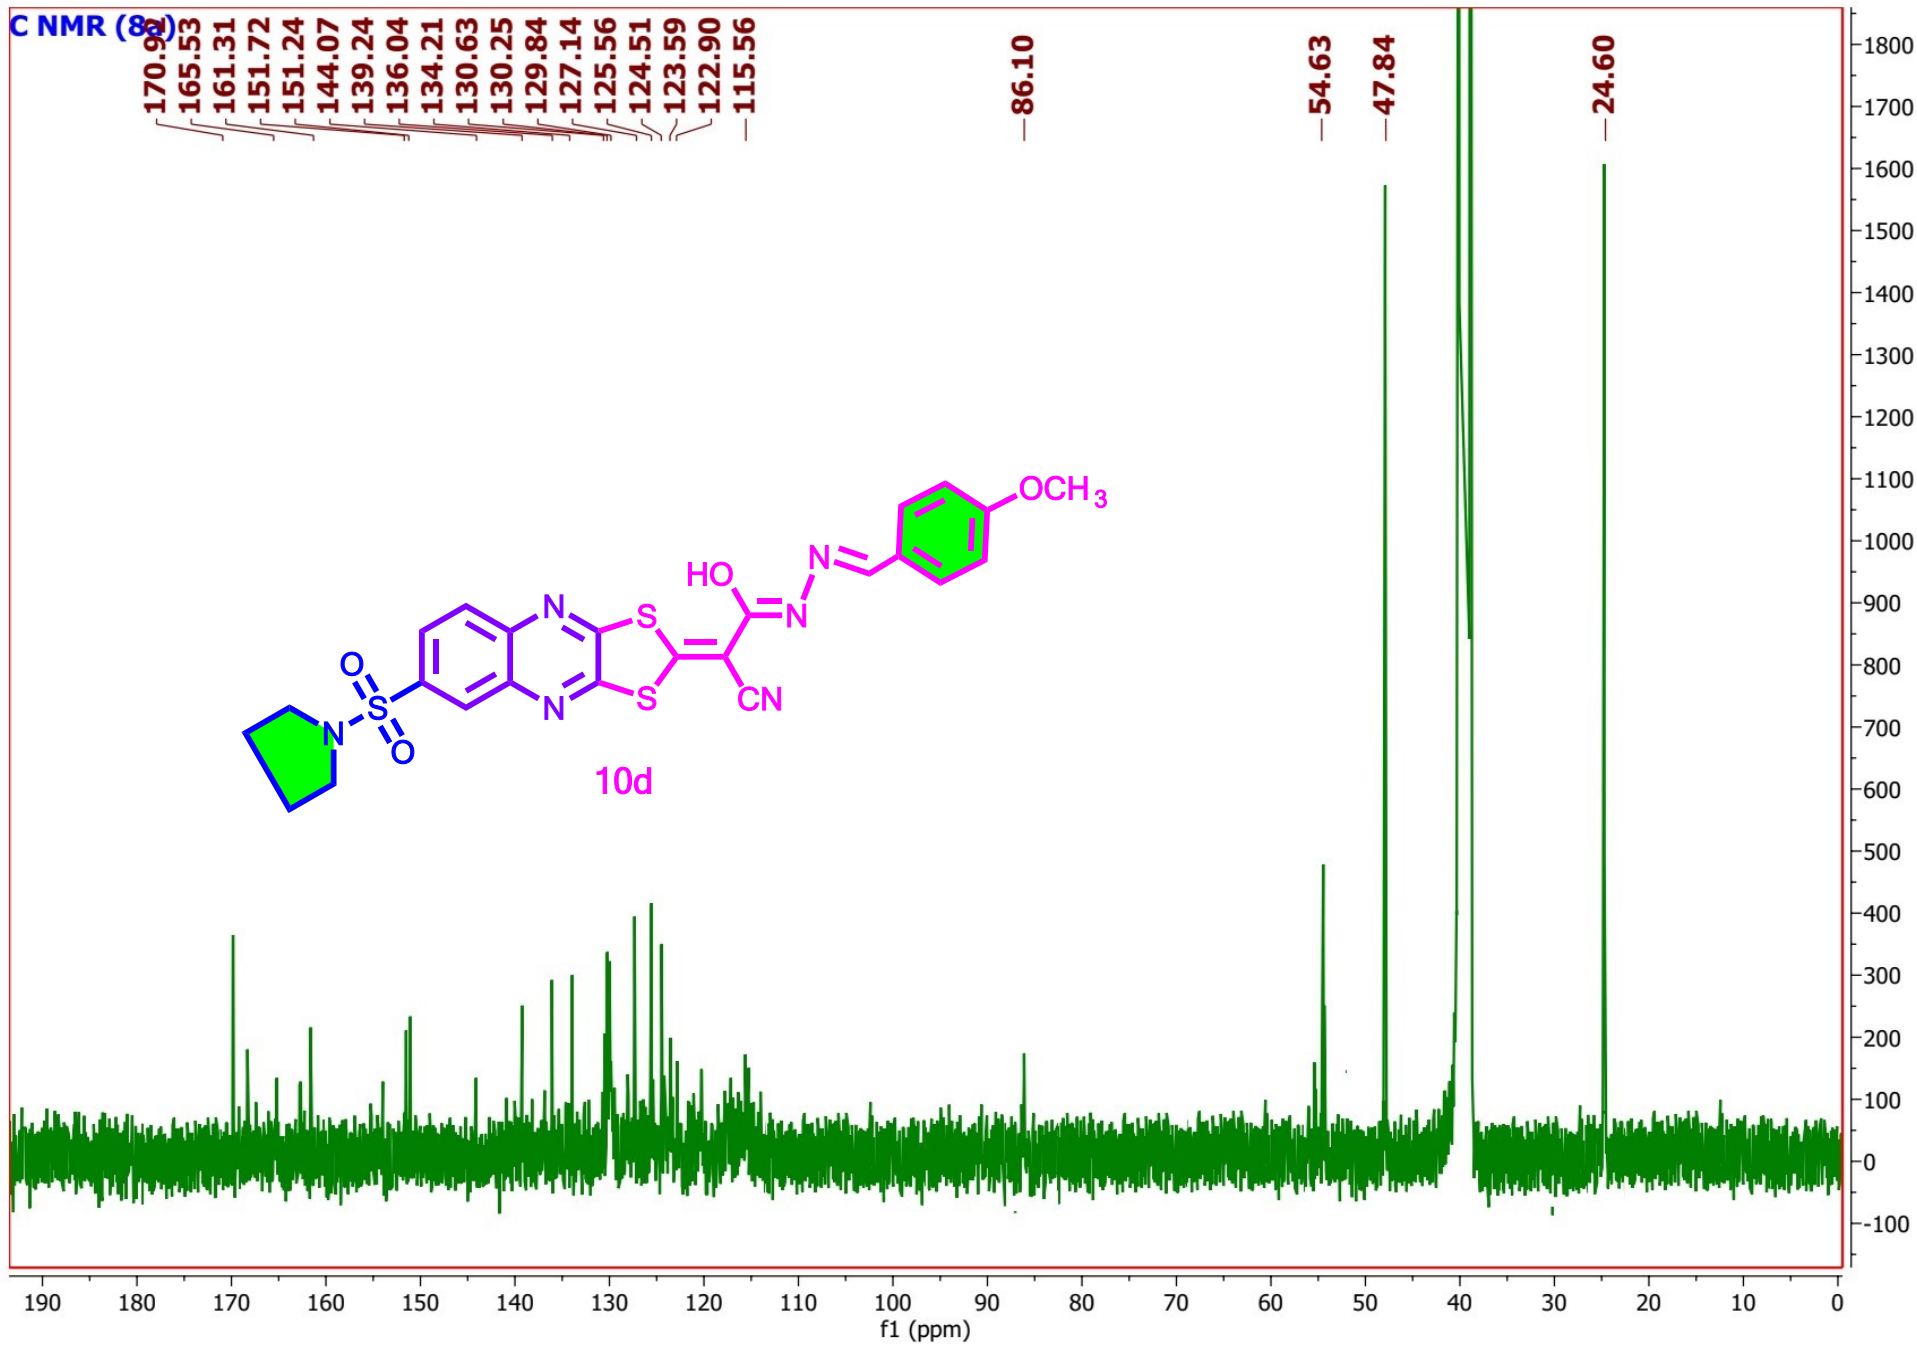



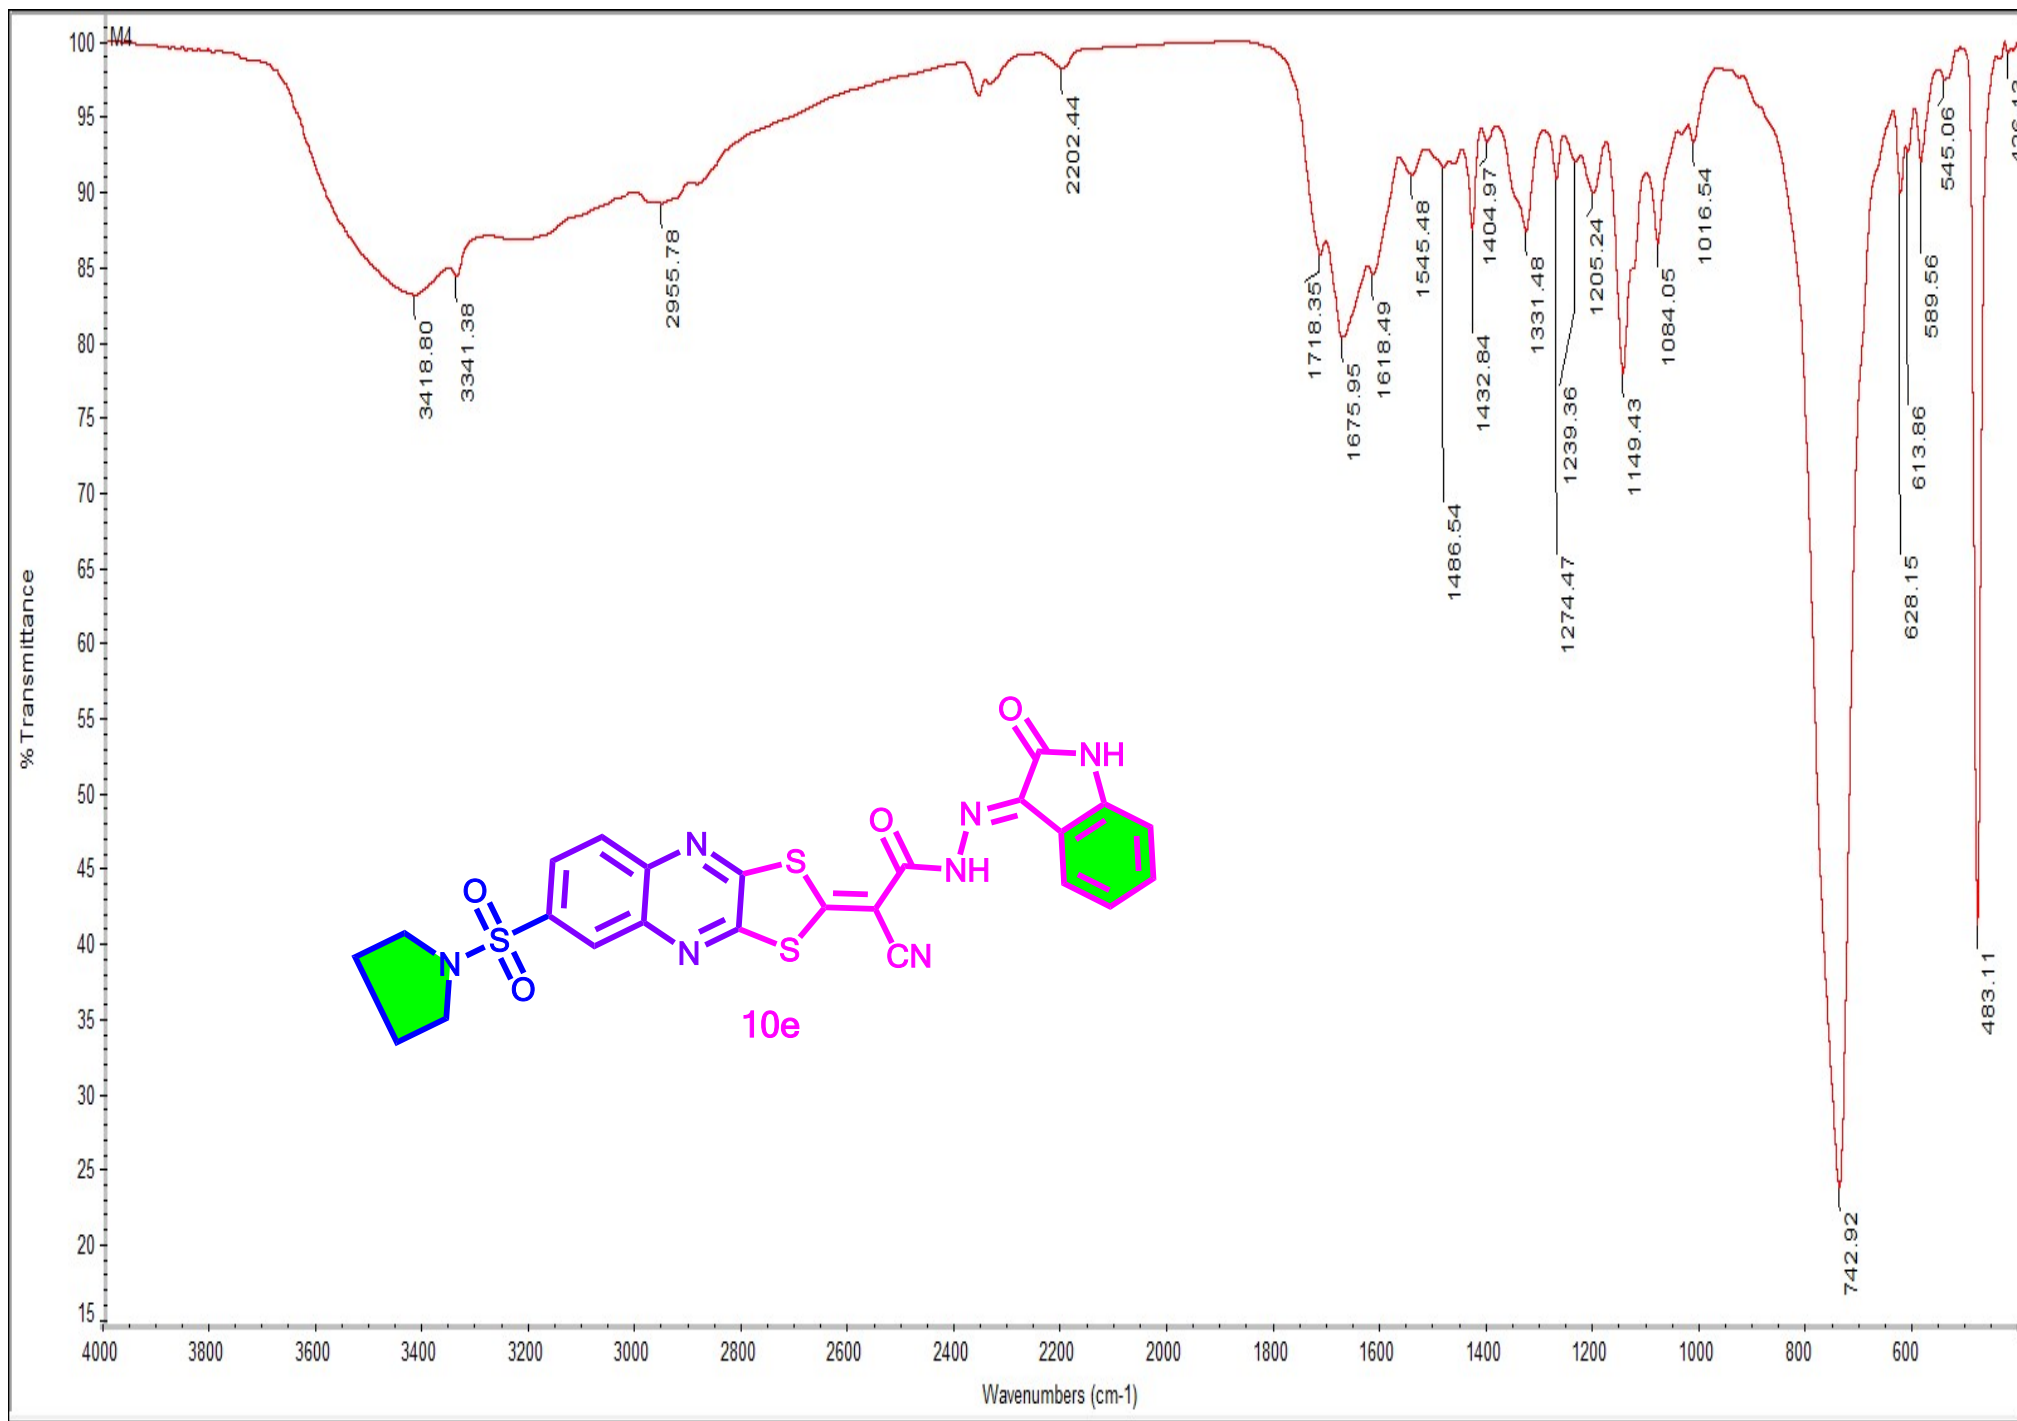

H NMR (9)

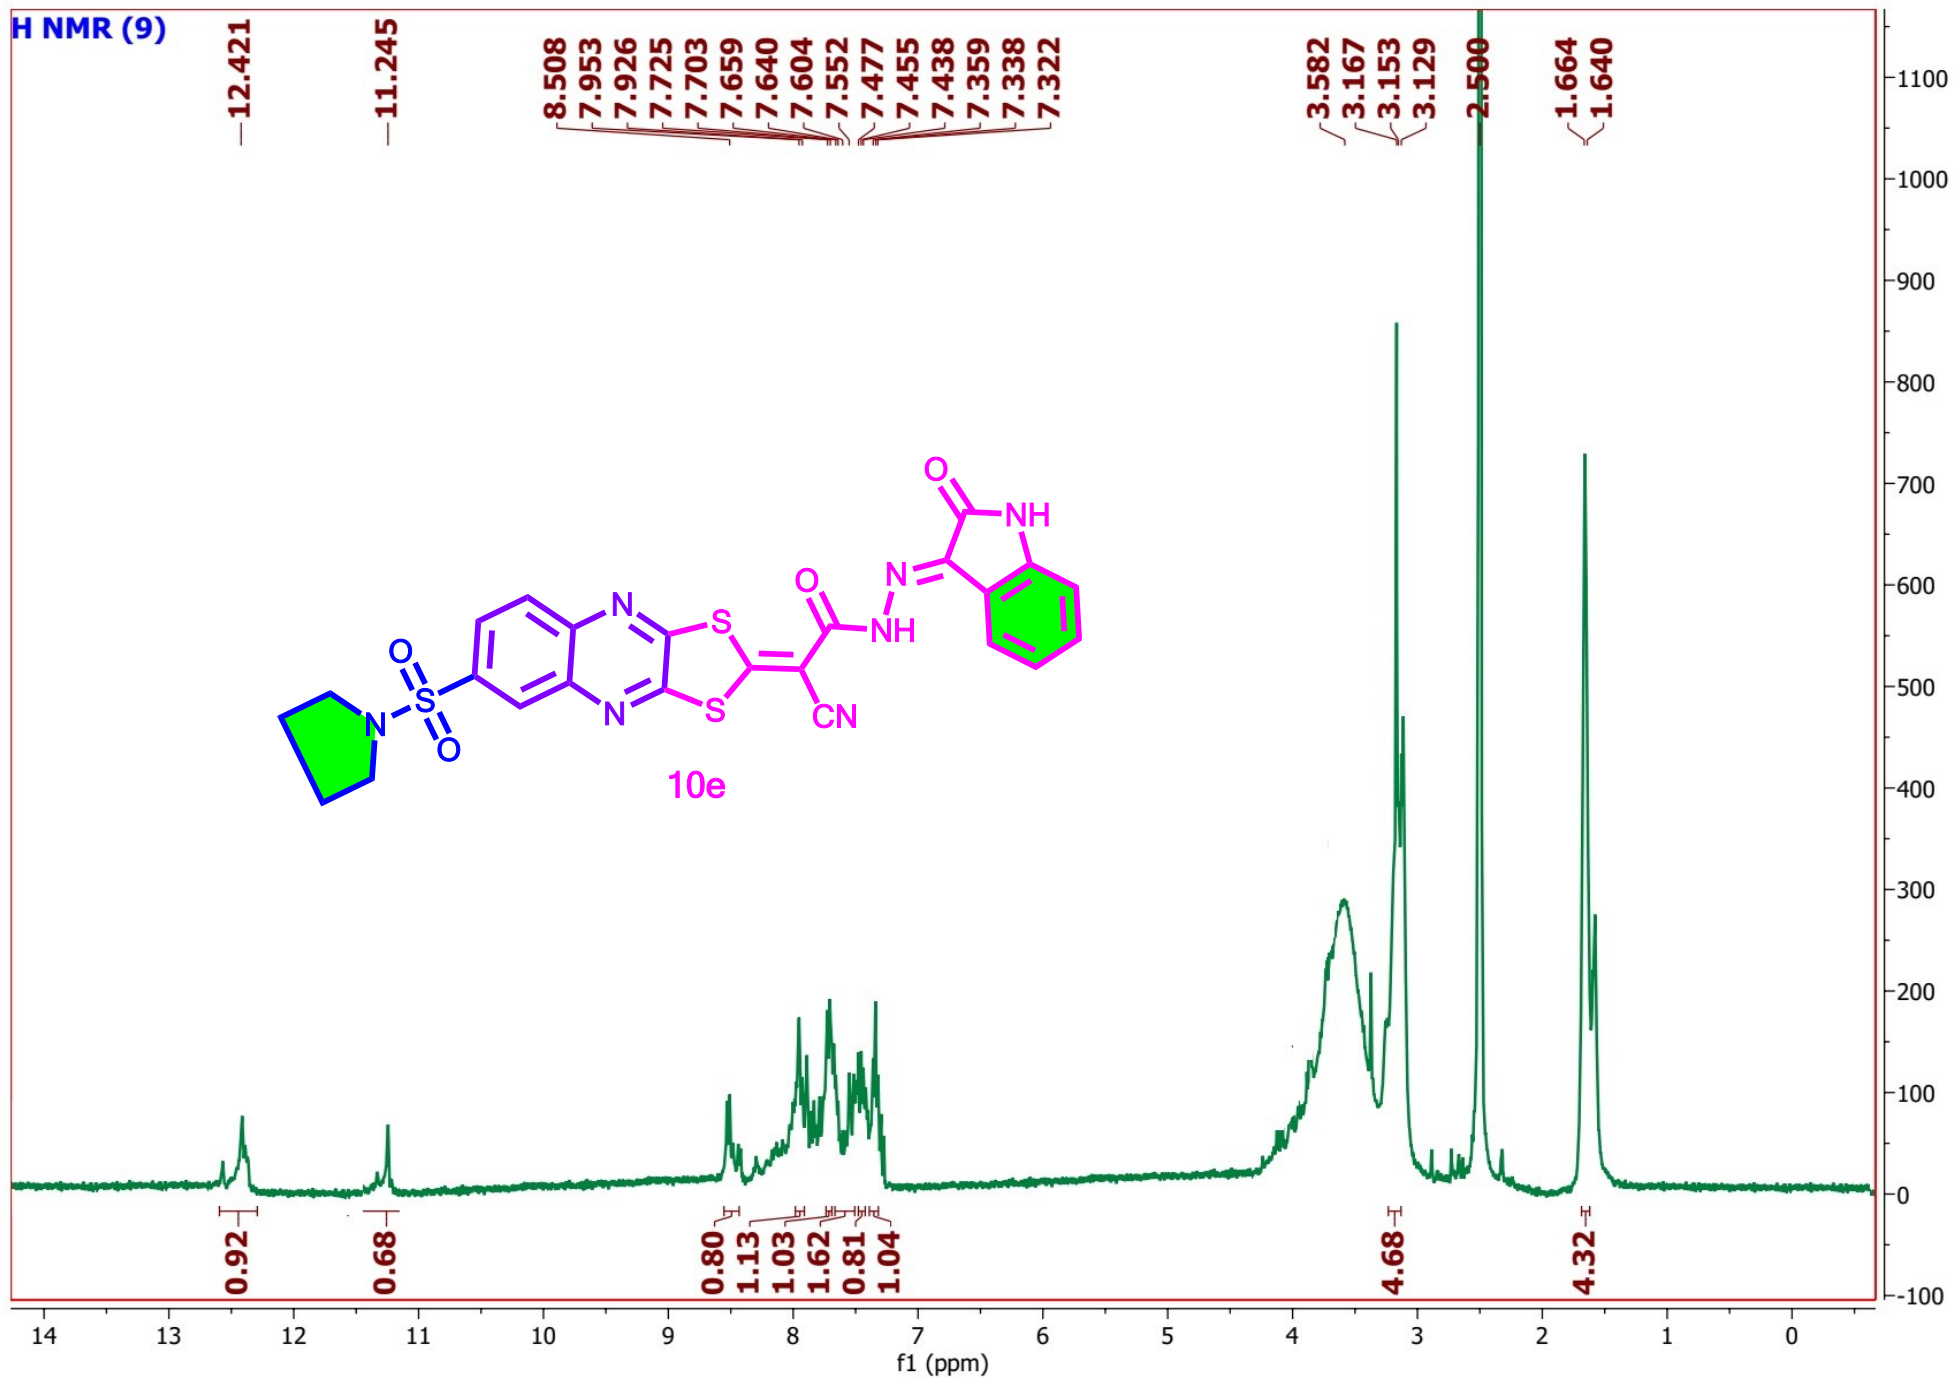

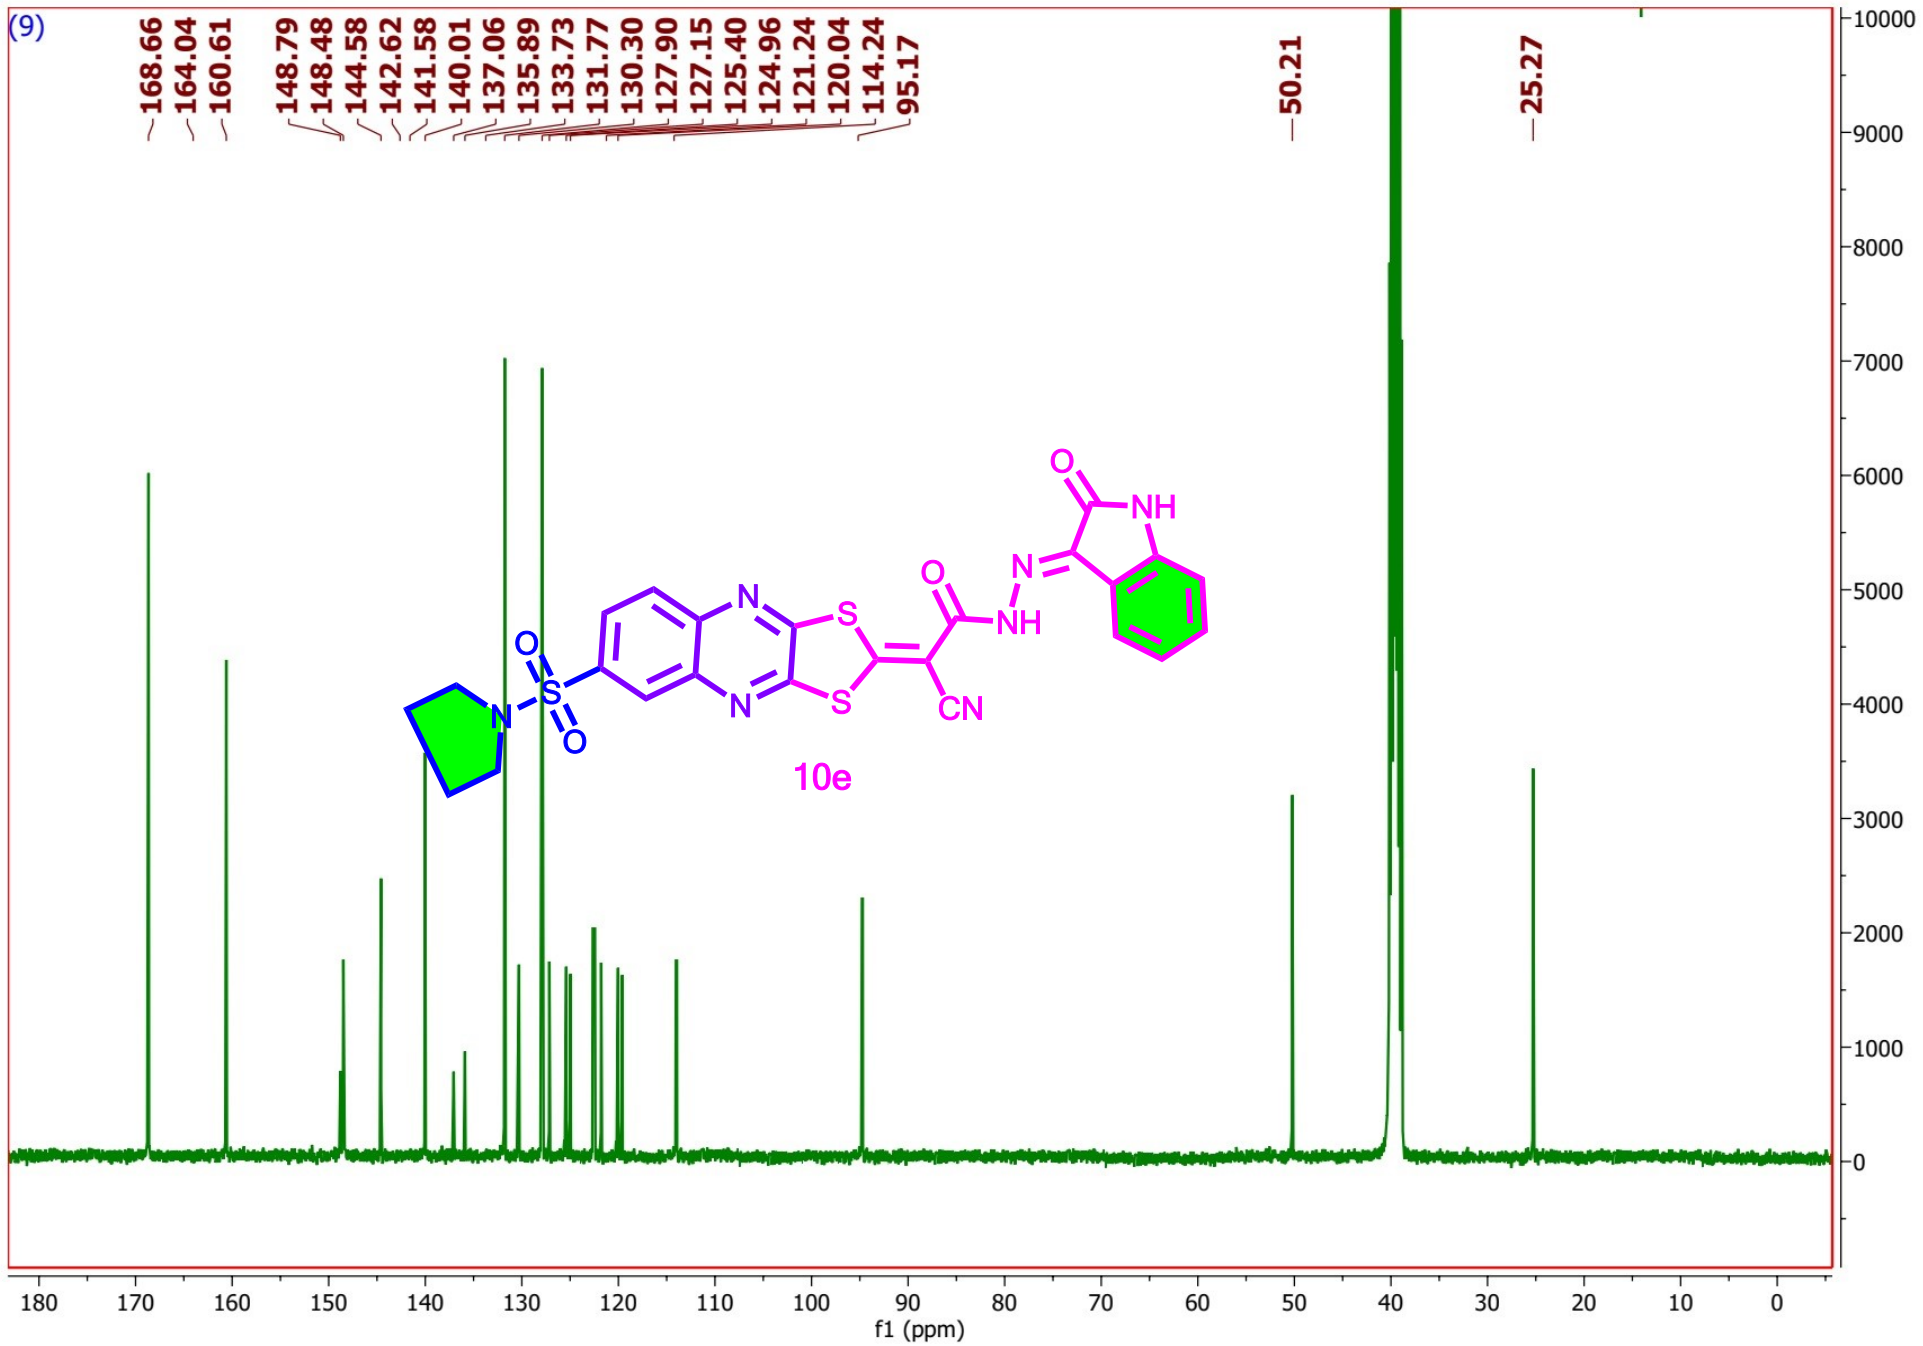

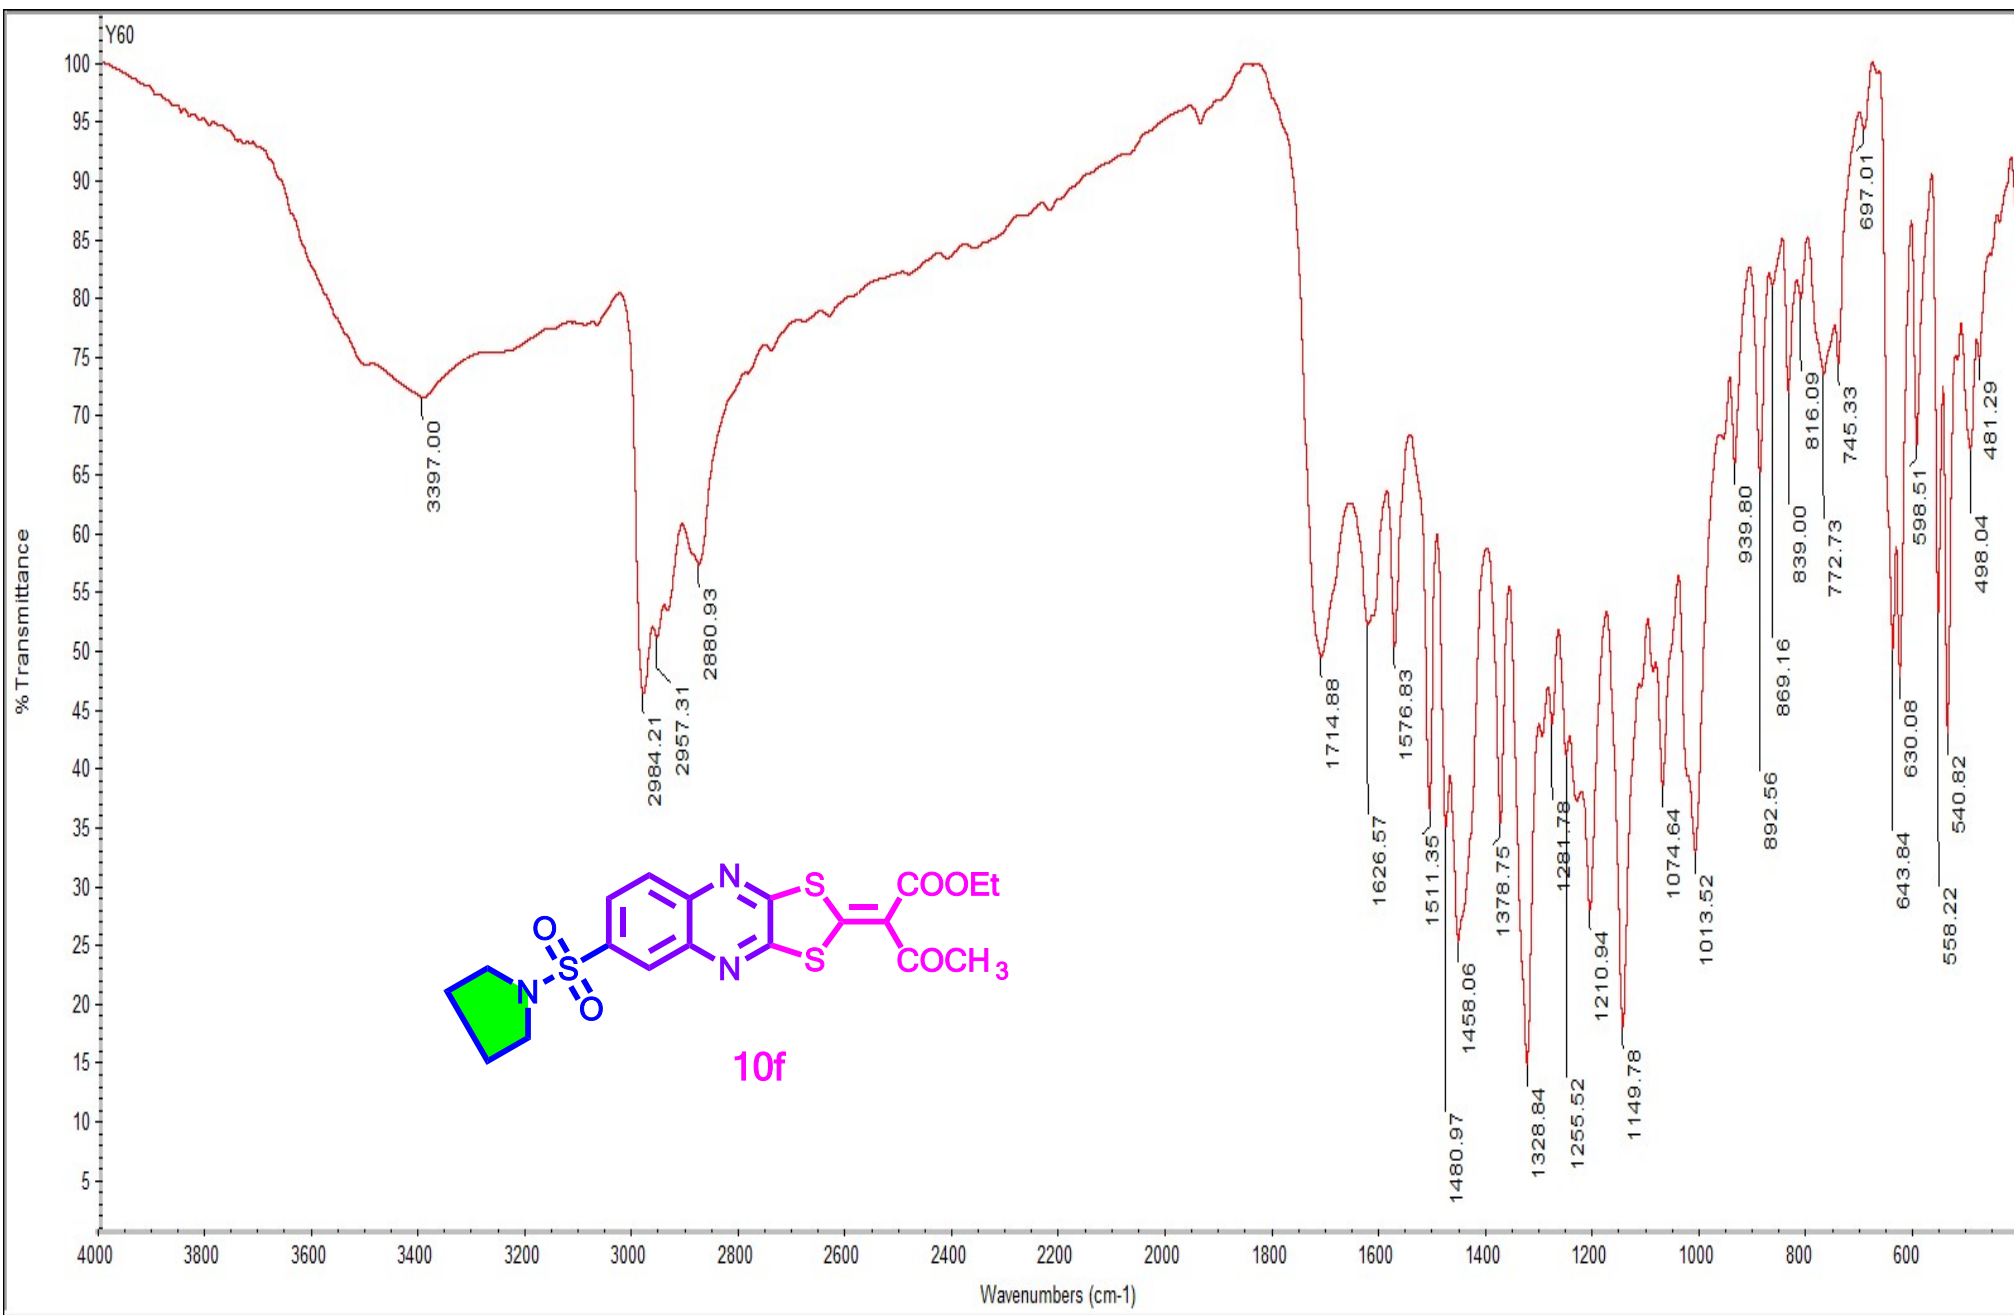

**H NMR (4)**

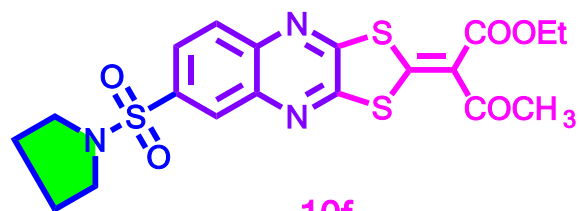

10f

8.024  
7.895  
7.874  
7.855  
7.850  
7.833  
7.829

4.565  
4.550  
4.529  
4.514  
3.334  
3.201  
3.184  
3.167  
2.495  
2.491  
1.657  
1.649  
1.641  
1.632  
1.623  
1.436  
1.419  
1.401

0.95  
1.03  
1.01

2.80

4.22

2.46

4.48

3.70

12 11 10 9 8 7 6 5 4 3 2 1 0 -1 -2

f1 (ppm)

11000  
10000  
9000  
8000  
7000  
6000  
5000  
4000  
3000  
2000  
1000  
0  
-1000

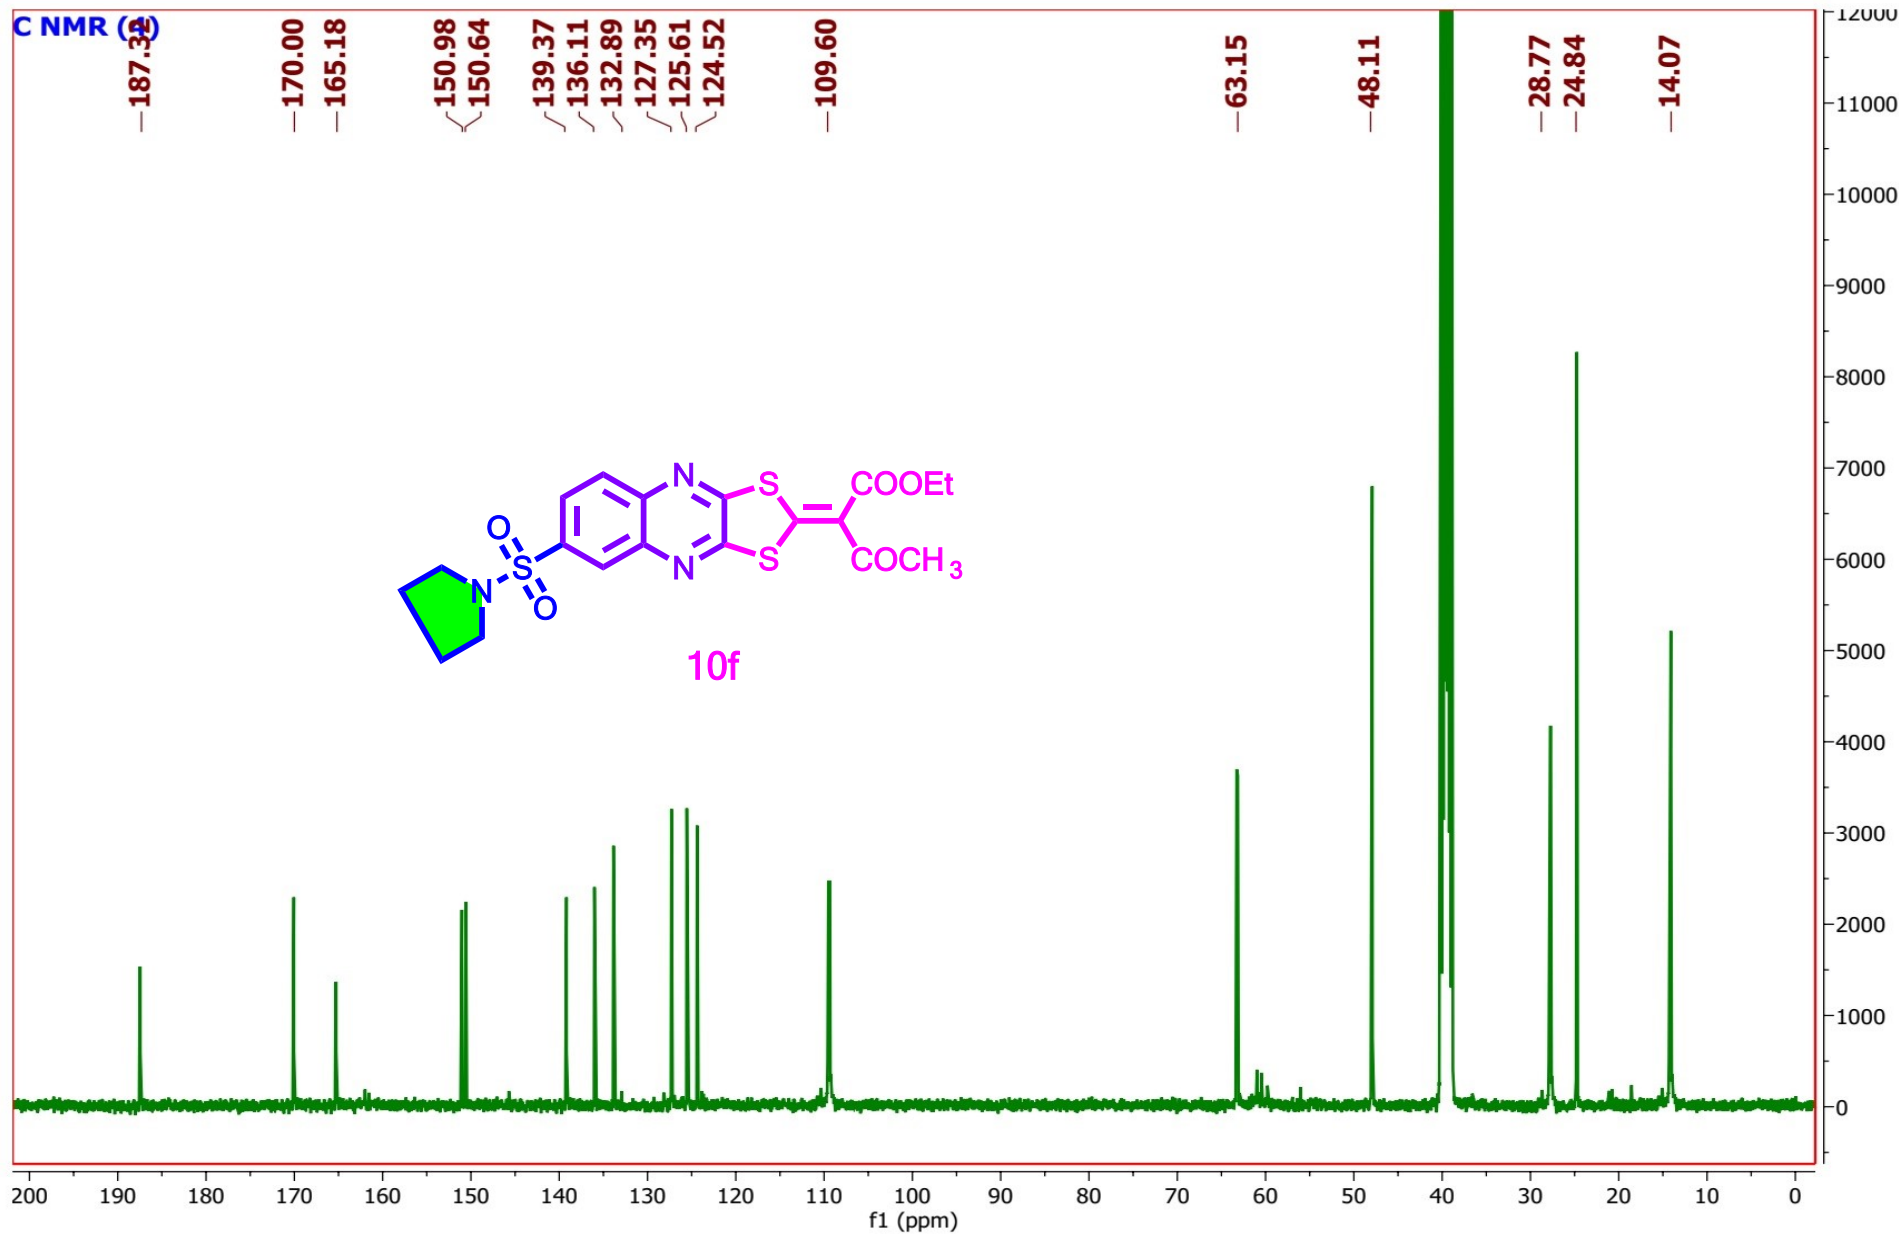

TIME (min)

ahmed-10f#148-151 RT: 2.49-2.54 AV: 4 SB: 20 2.38-2.58, 2.34-2.44 NL: 201E2

T: + cEI Full ms [40.00-1000.00]

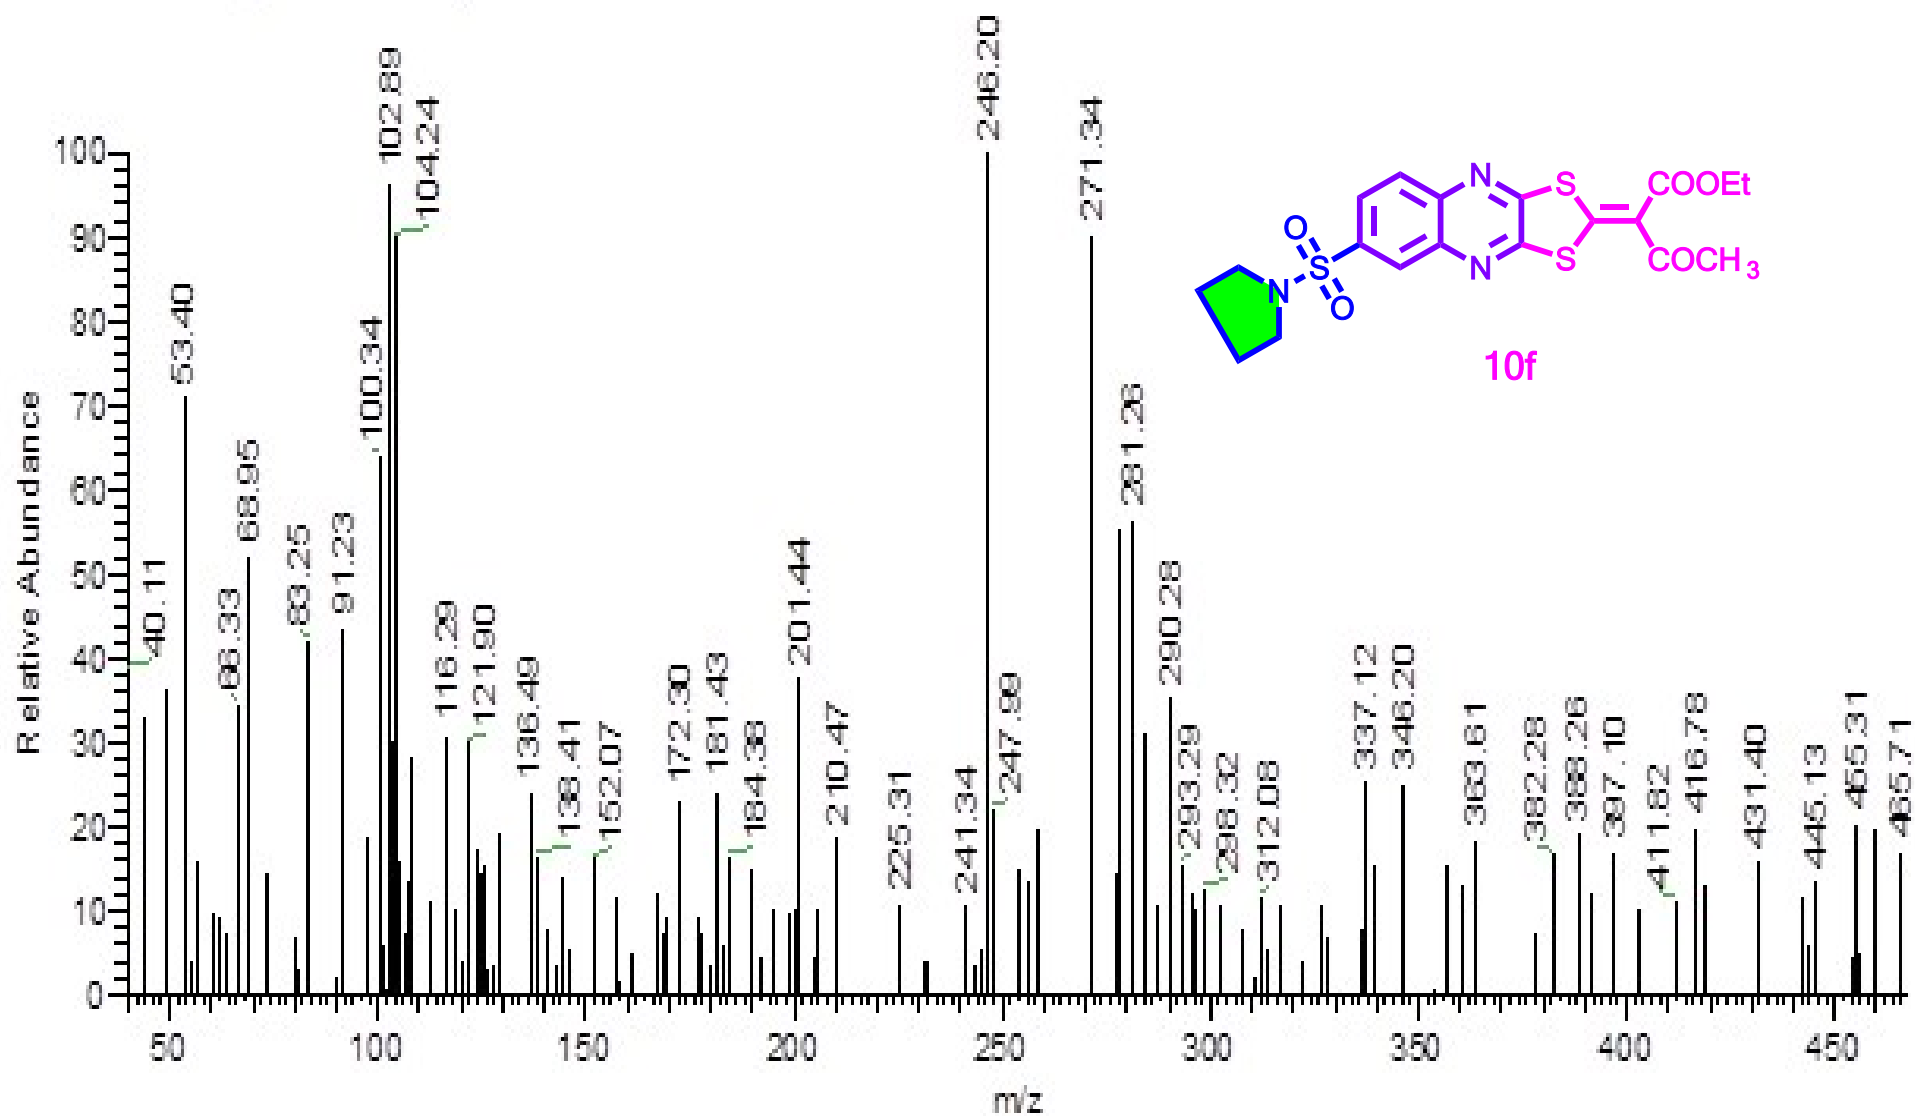

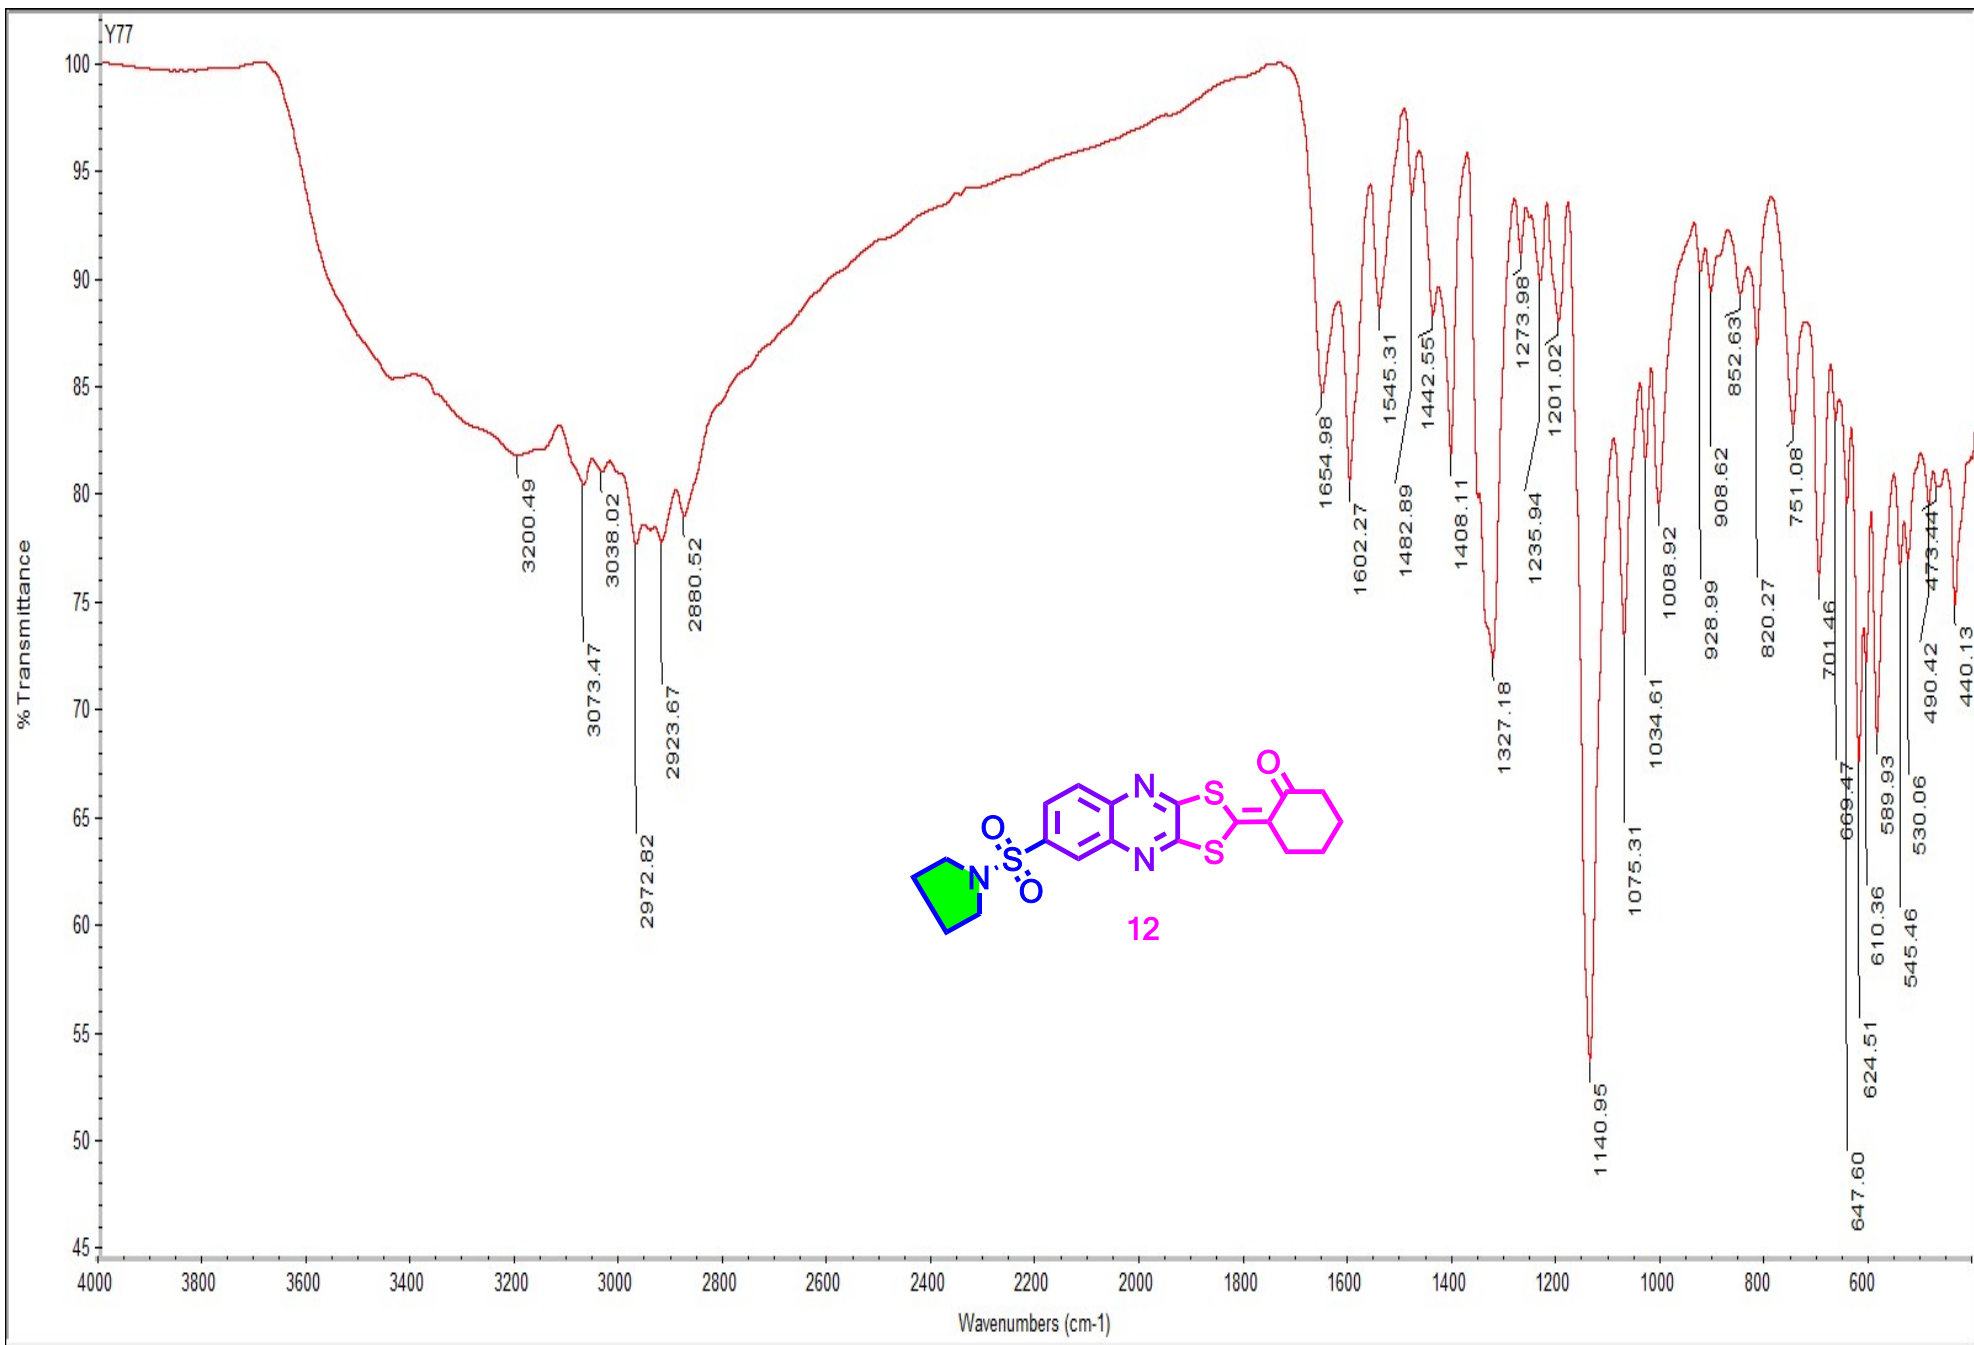



H NMR (10)

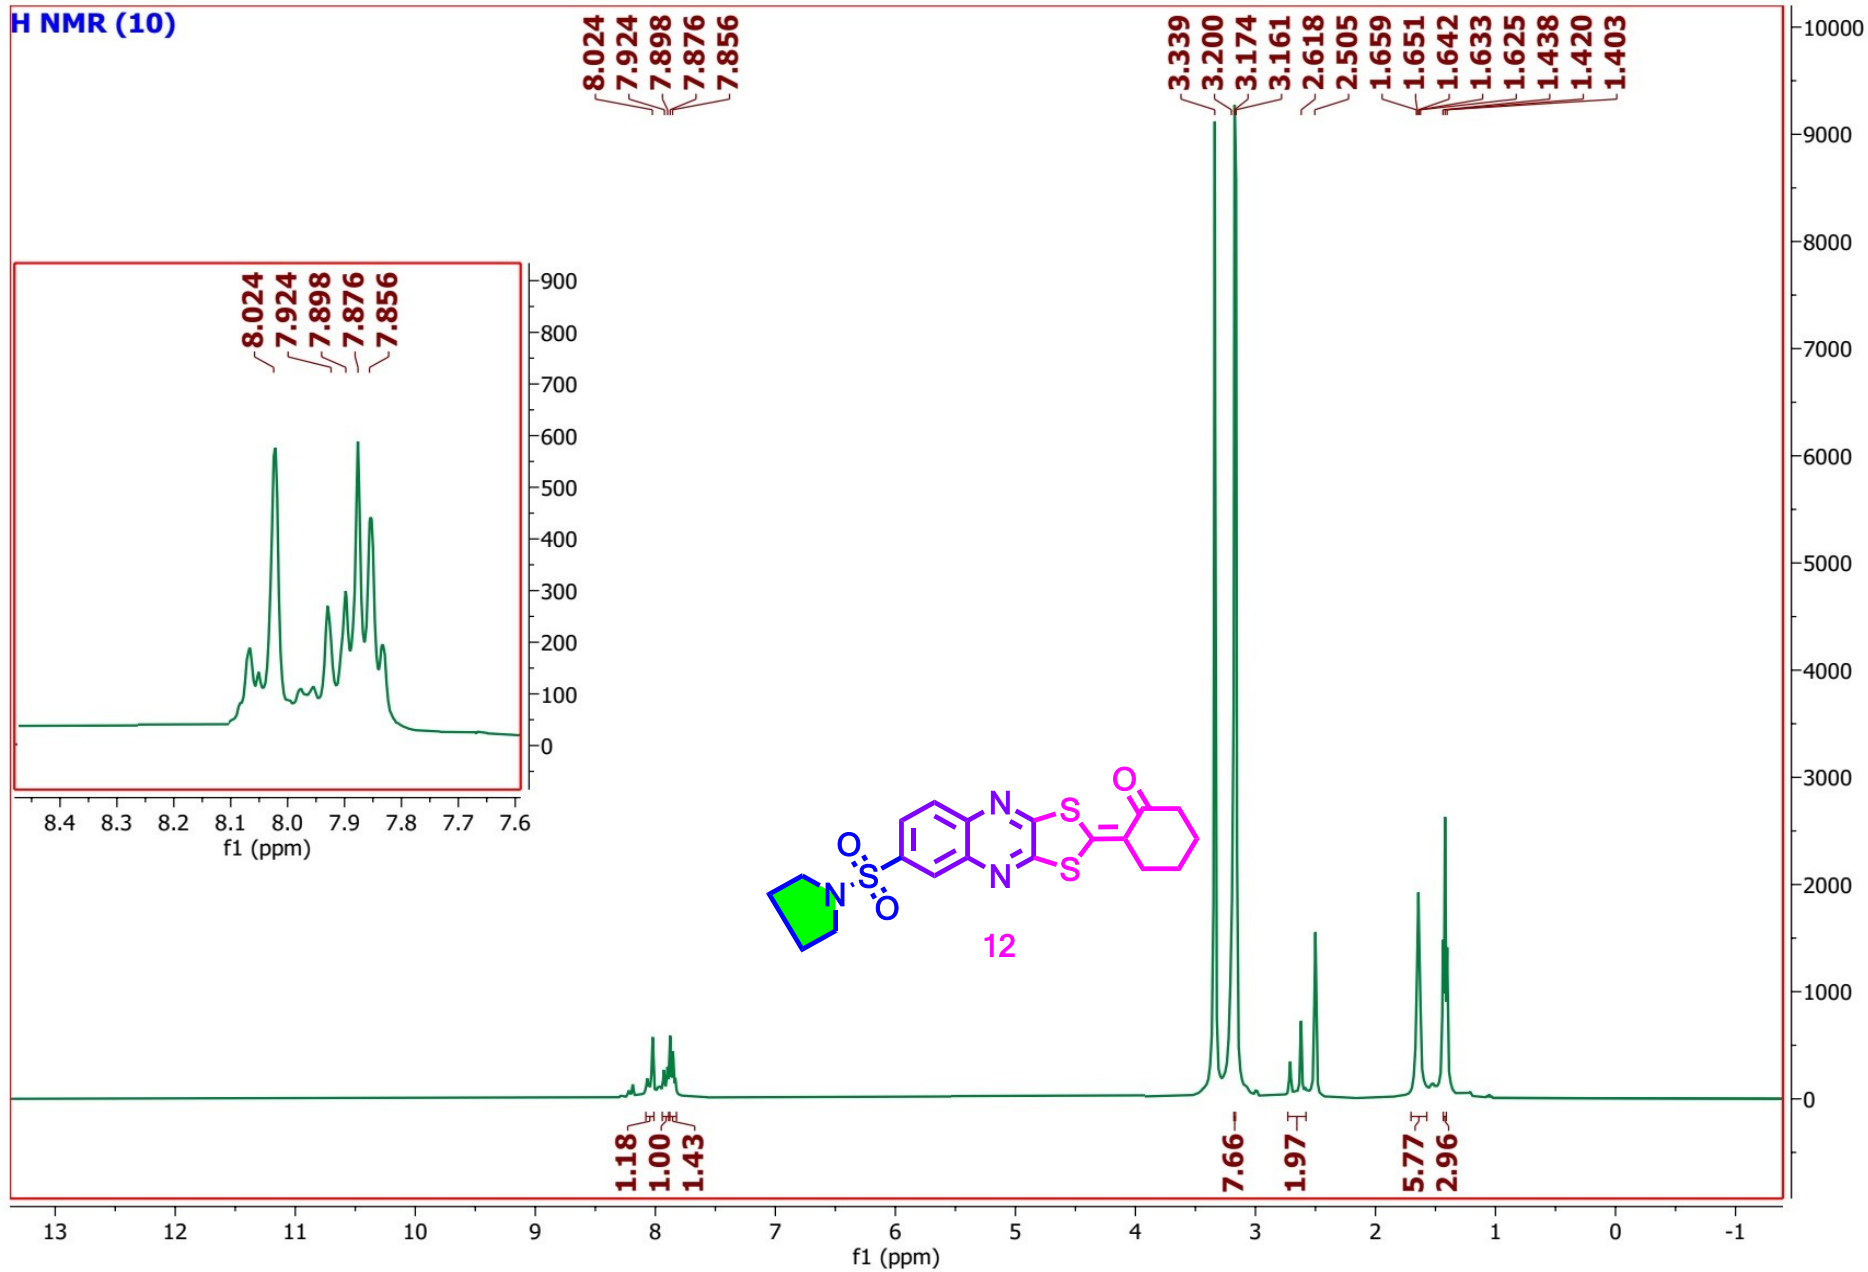

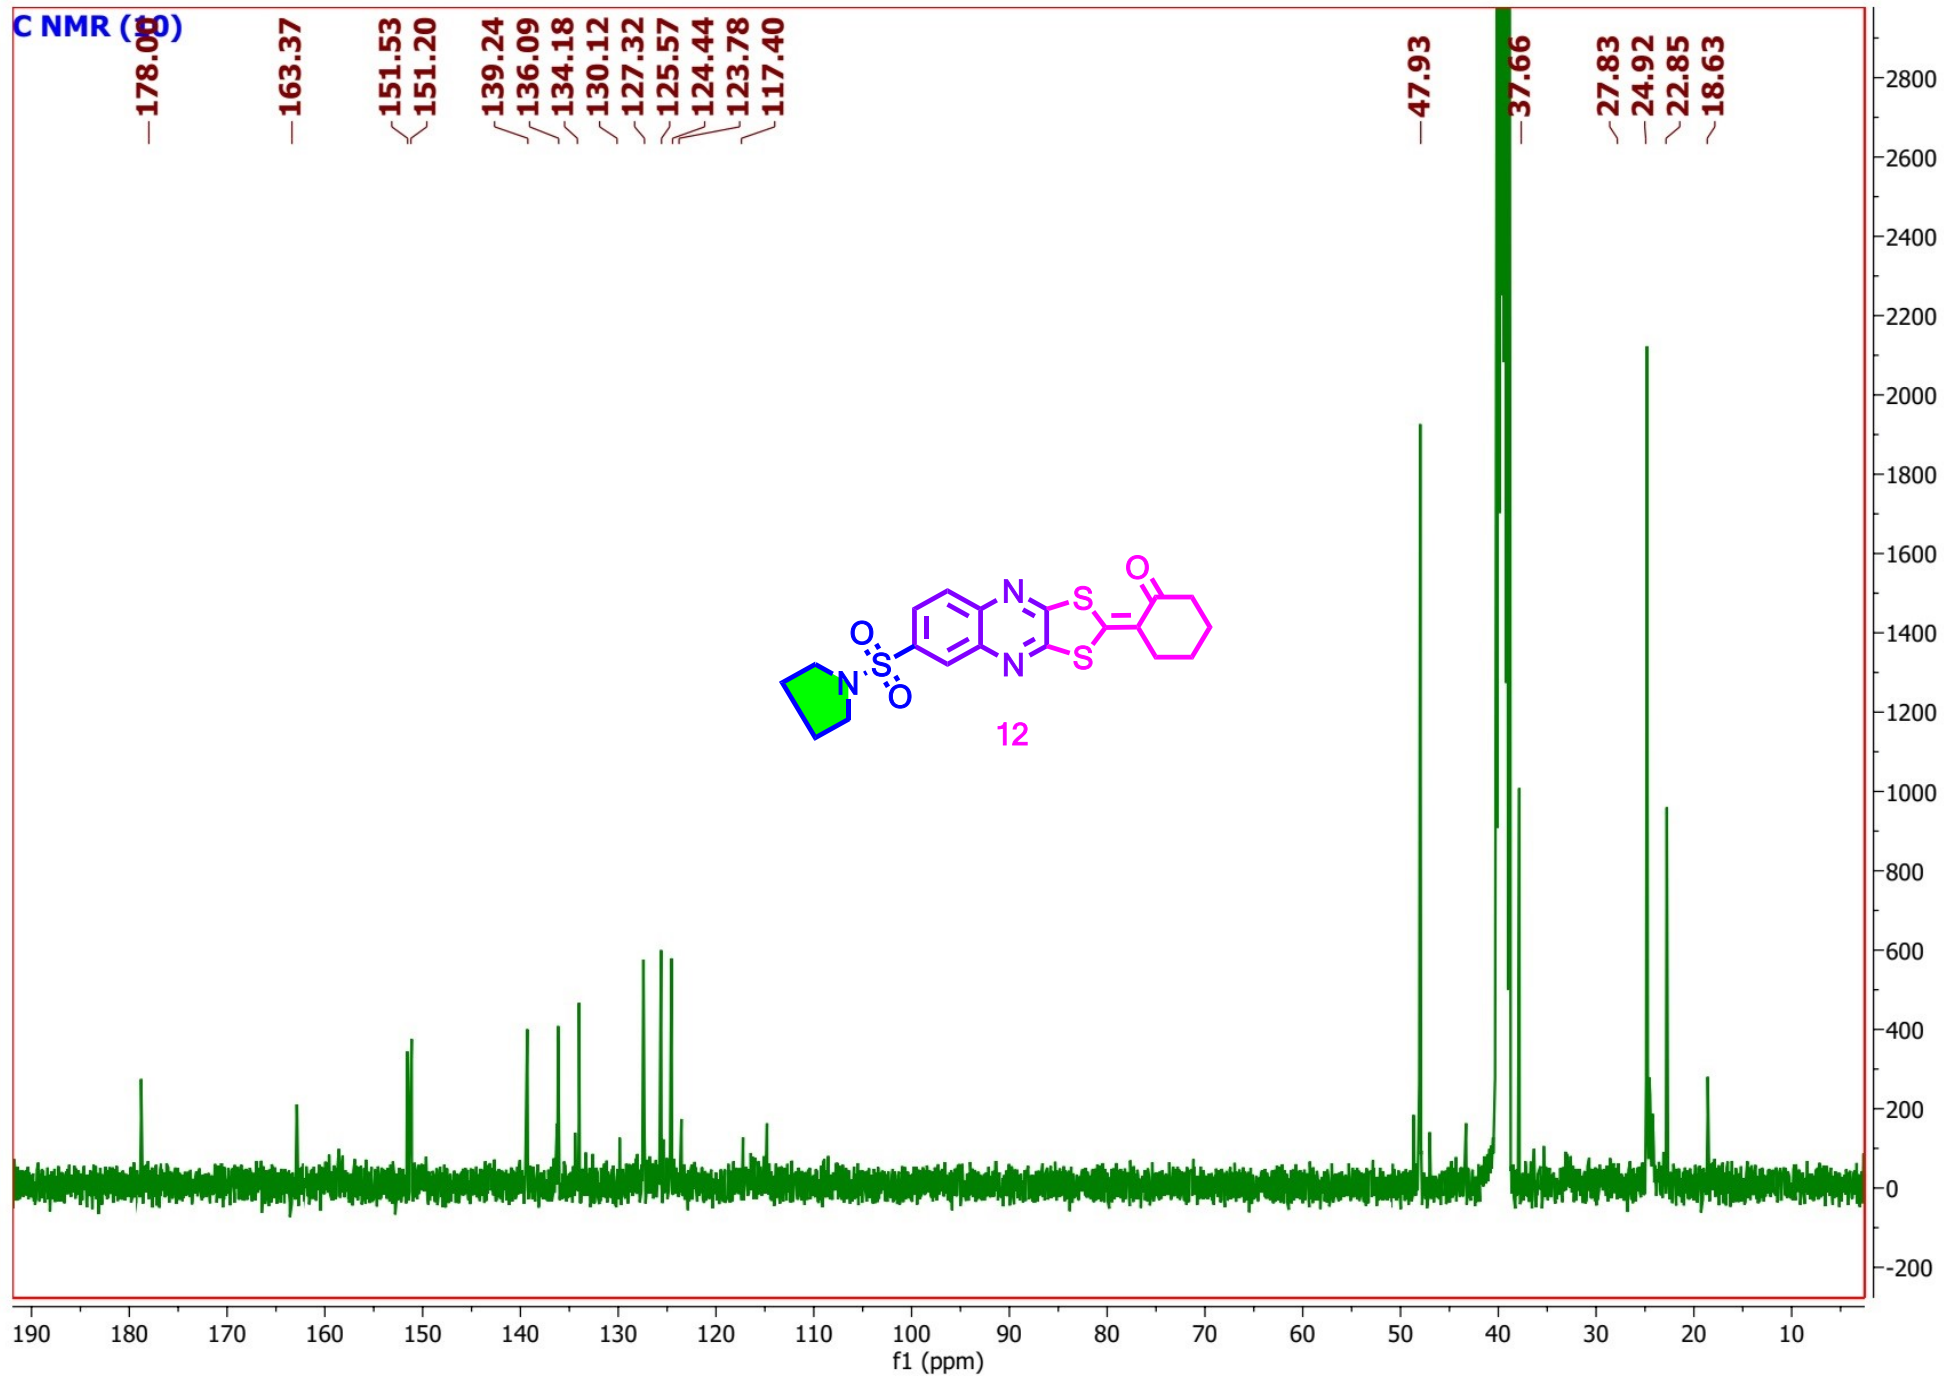

Time (min)

ahmed-12 #87-95 RT: 1.47-1.61 AV: 9 SB: 26 1.21-1.34 , 0.87-1.14 NL: 1.20E2

T: + cEI Full ms [40.00-1000.00]

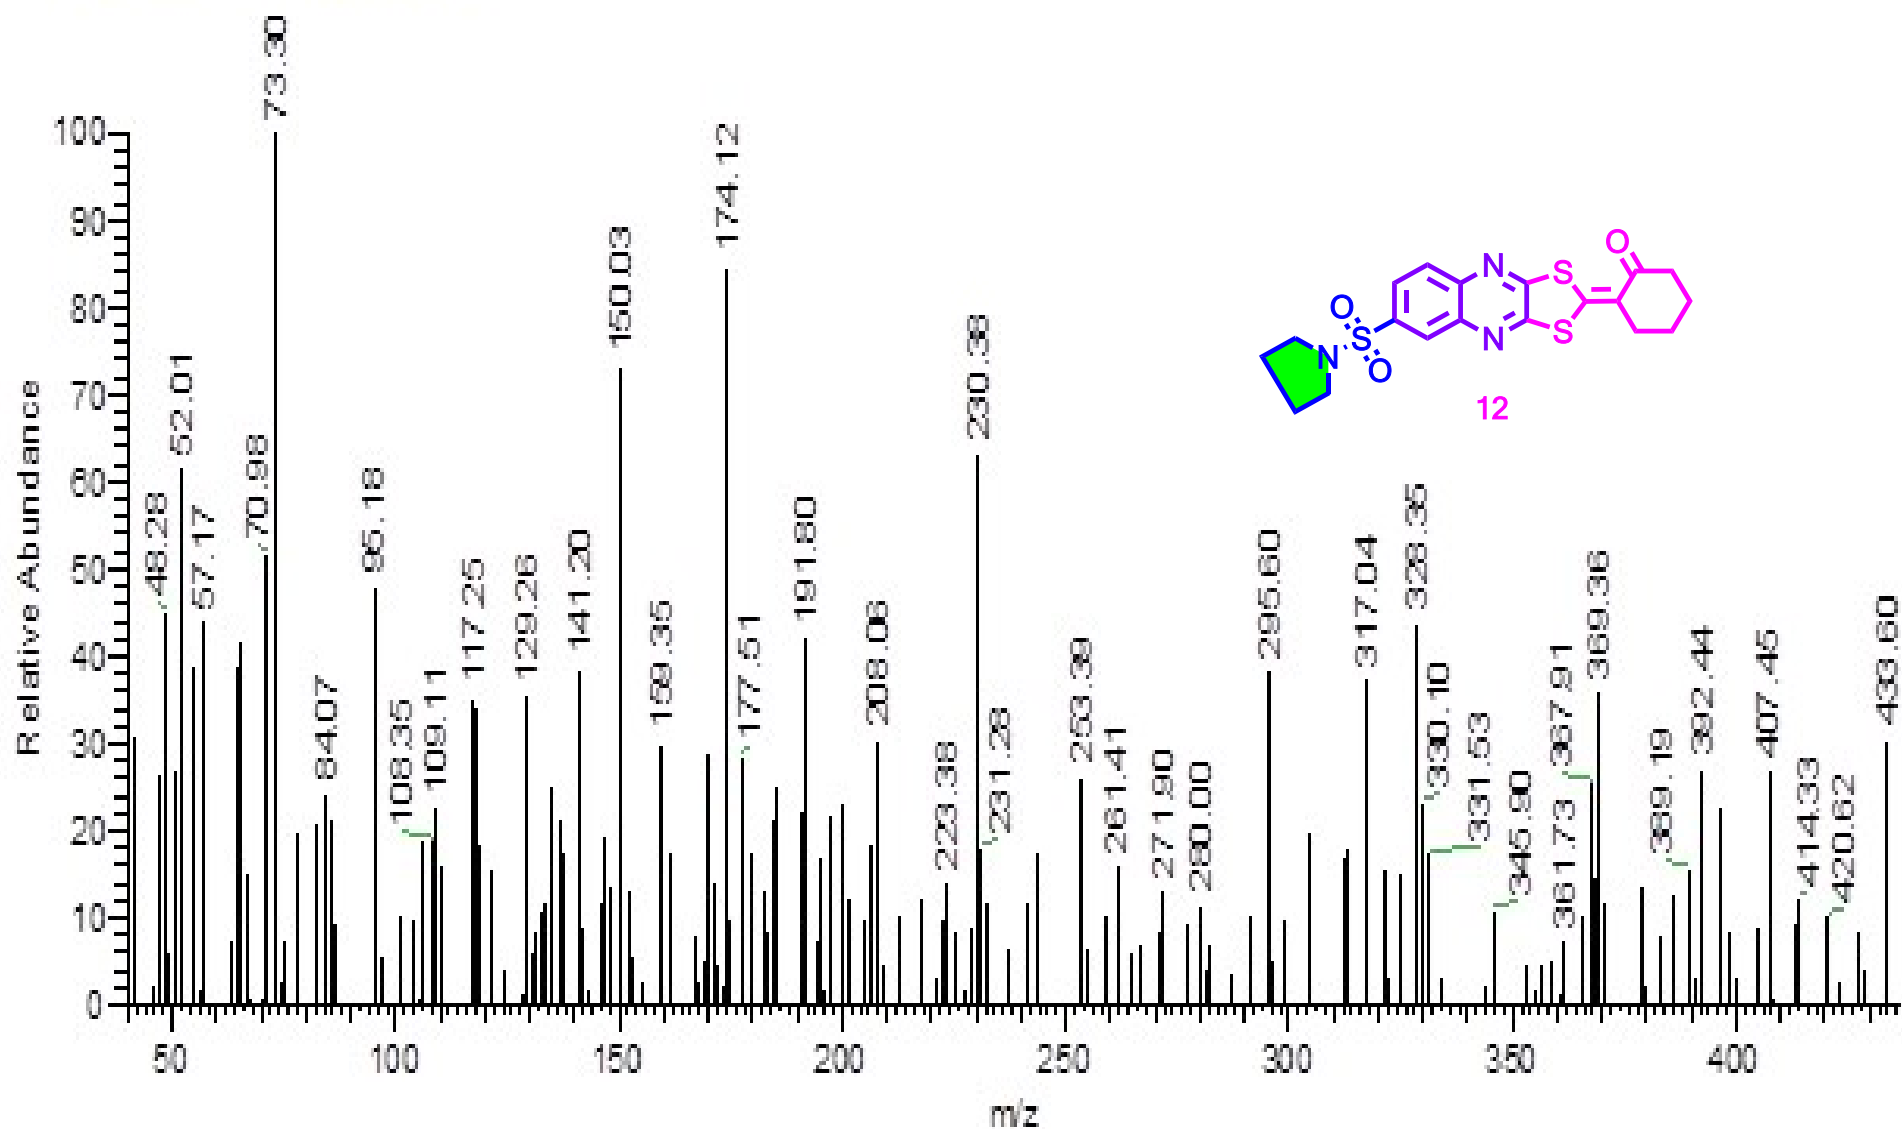

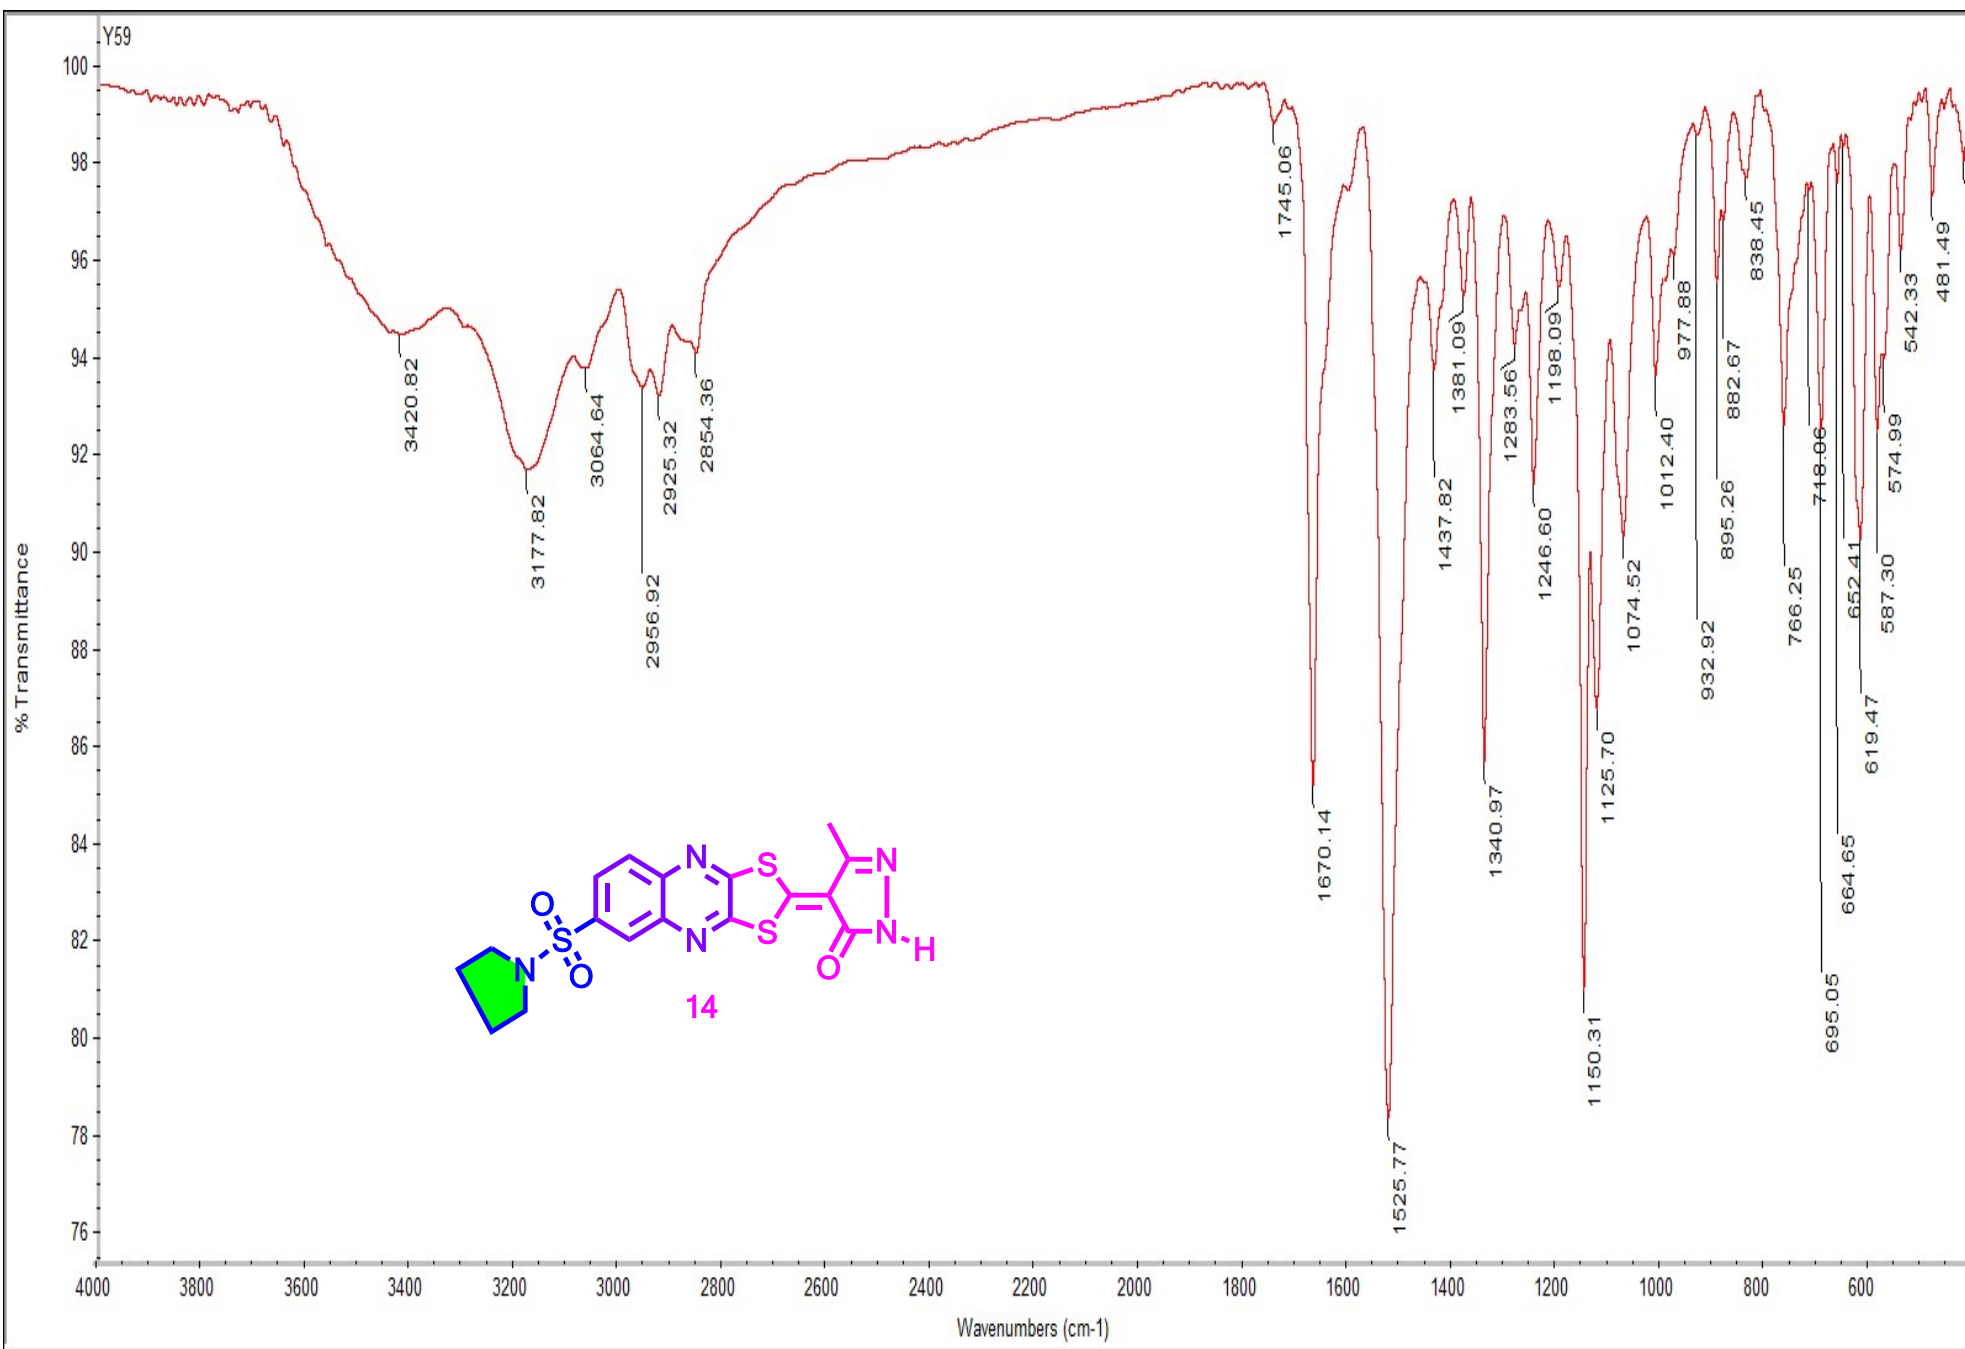

H NMR (11a)

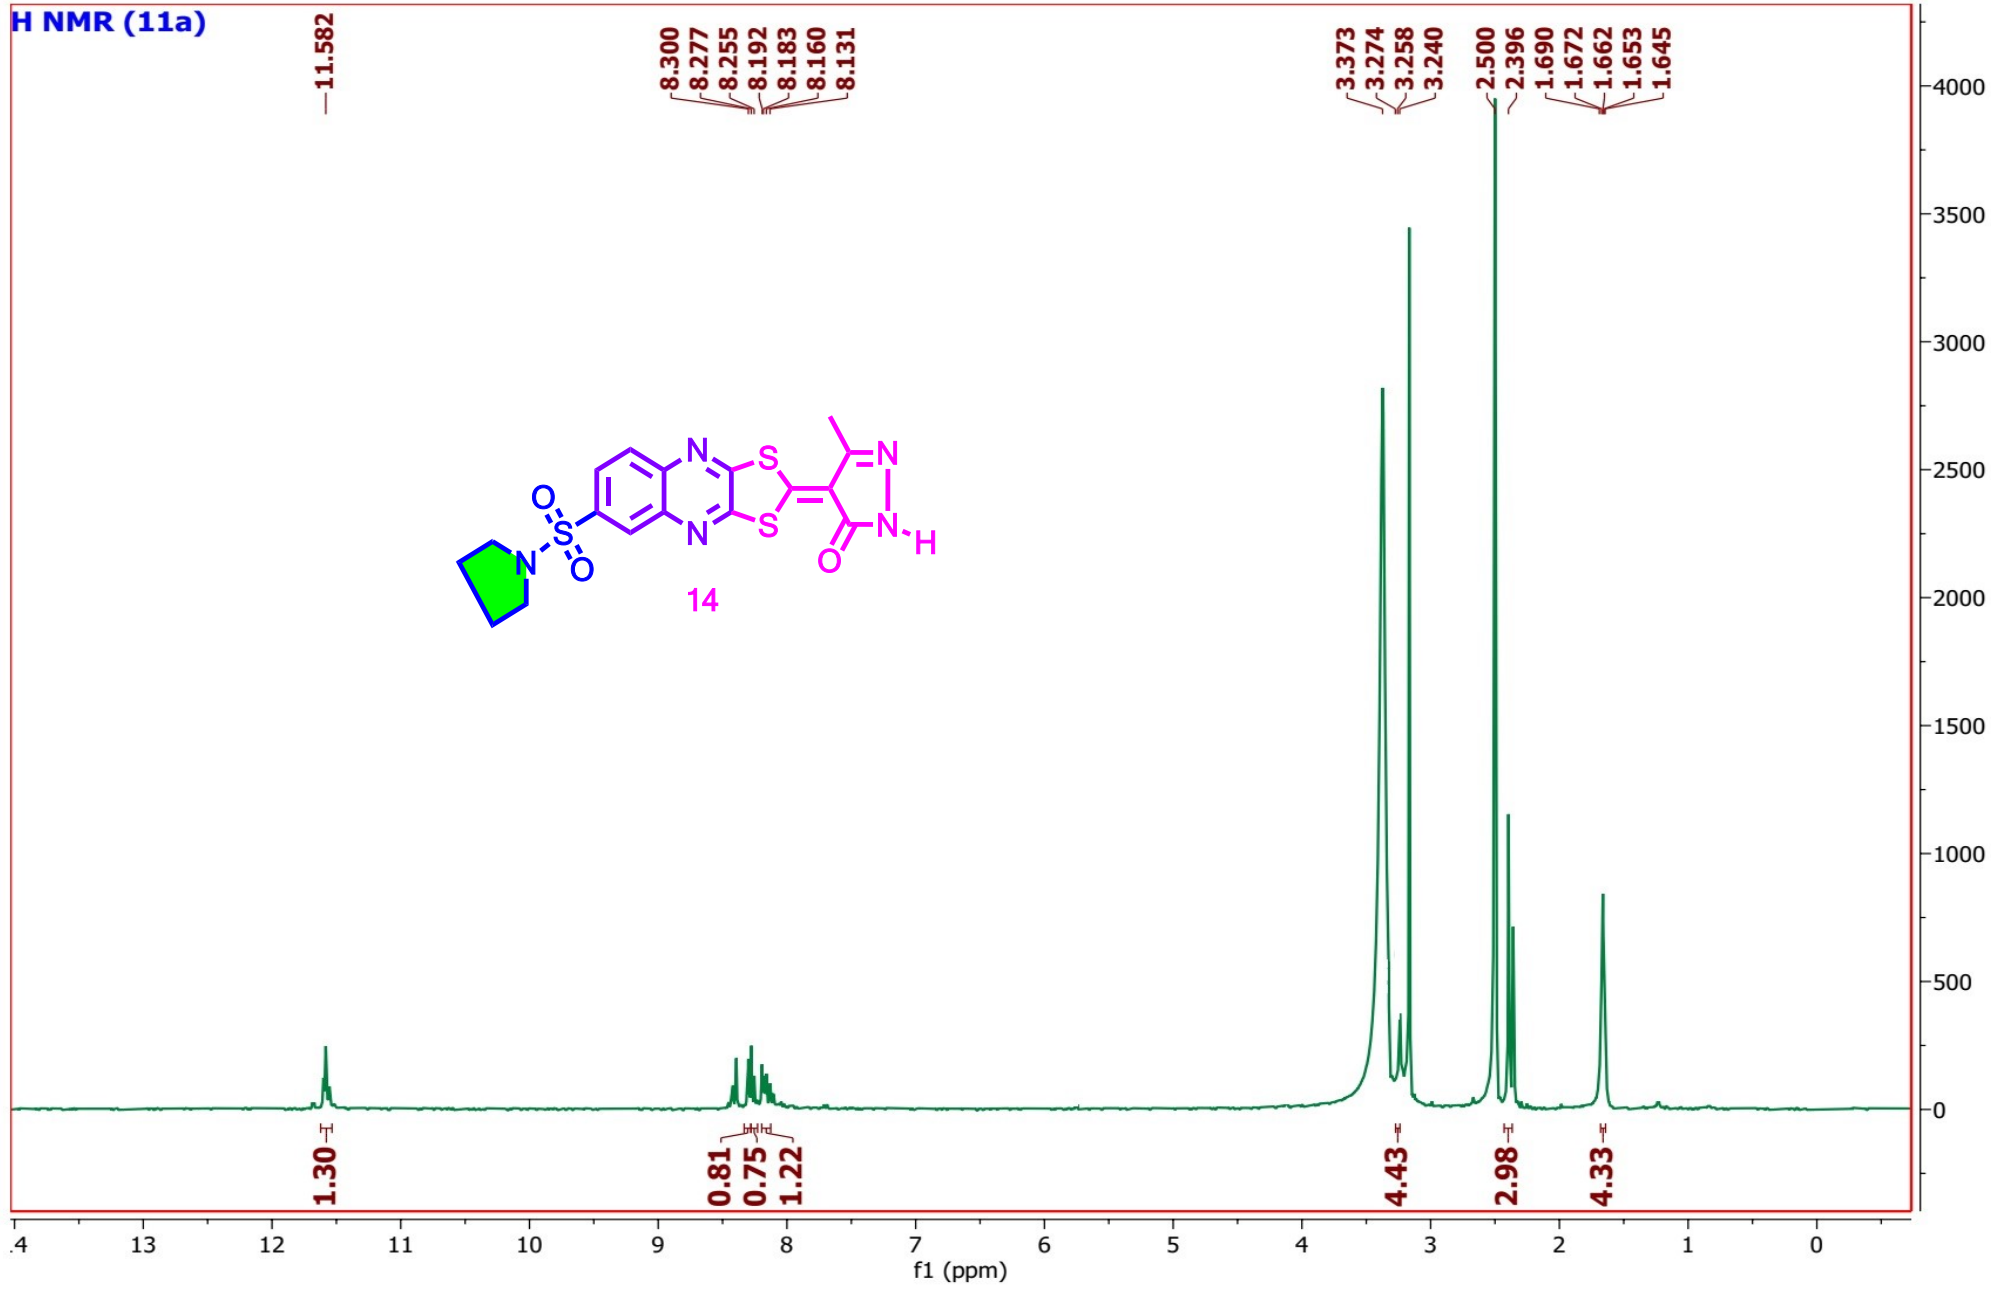

C NMR (11a)

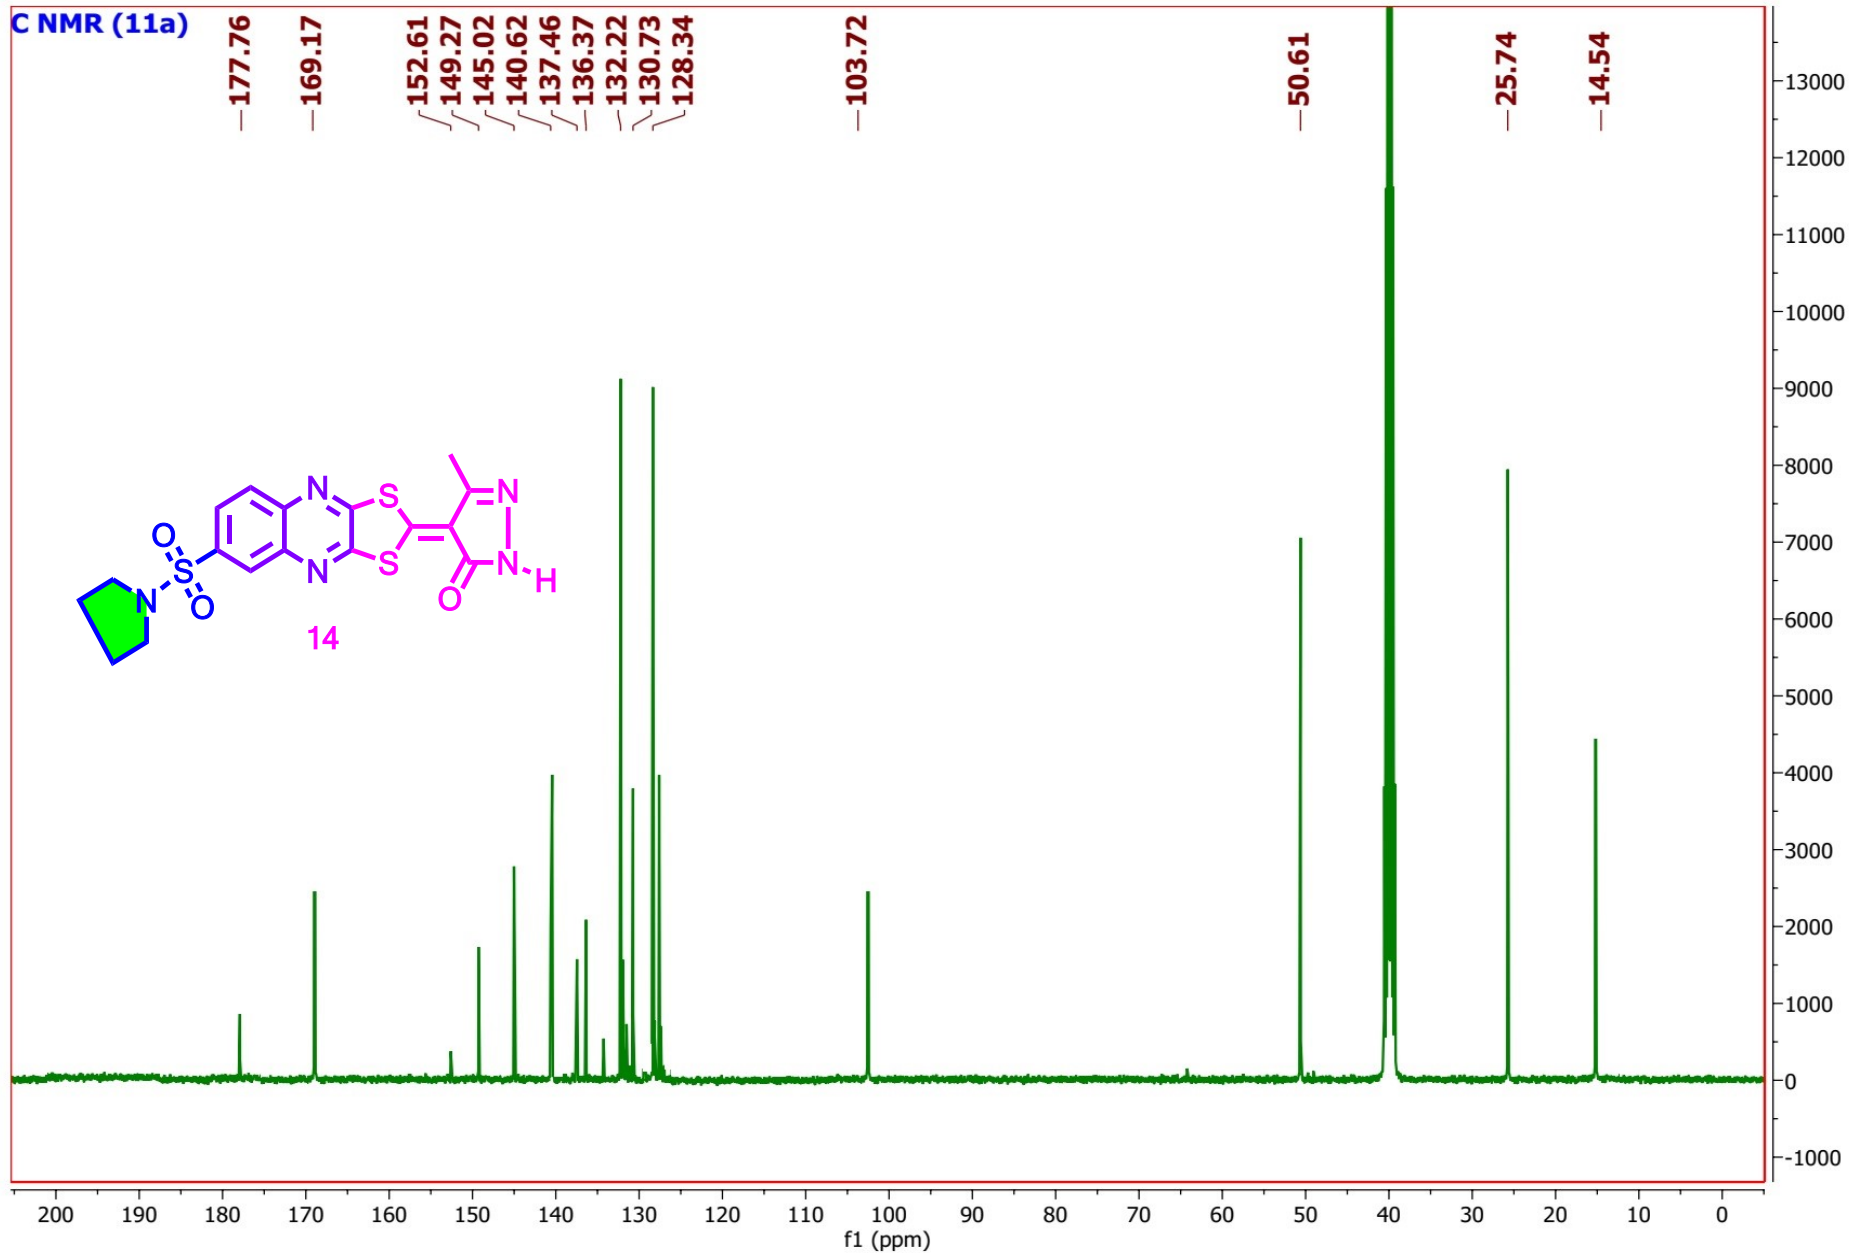

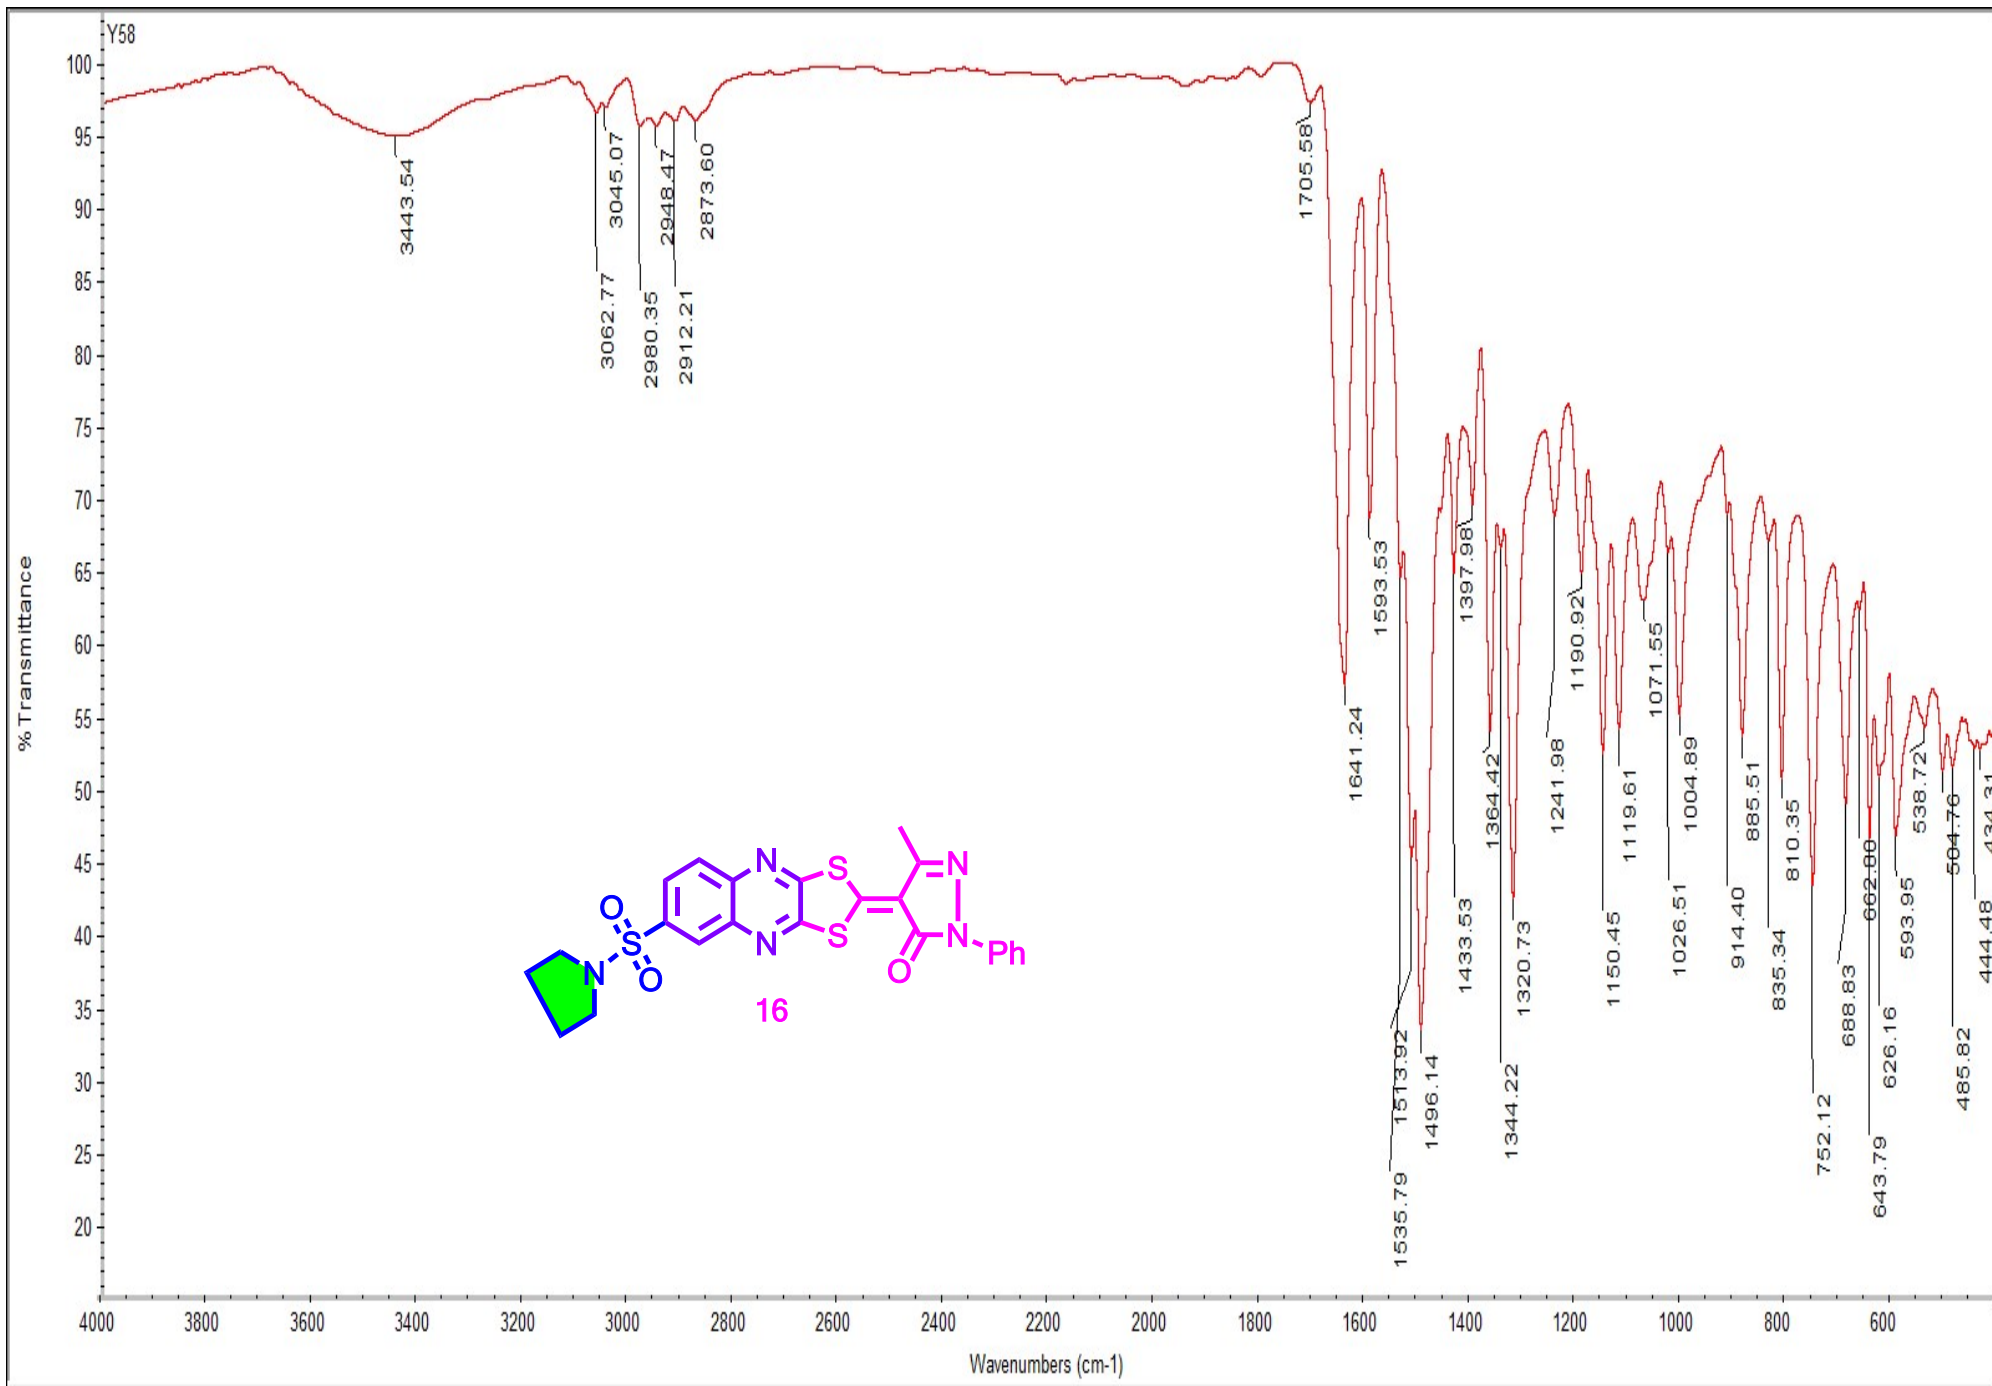

H NMR (11b)

8.303  
8.180  
8.159  
8.124  
8.107  
7.927  
7.907  
7.470  
7.452  
7.430  
7.279  
7.226  
7.206  
7.201

3.385  
3.256  
3.220  
3.130  
2.500  
2.442  
1.683  
1.675  
1.666  
1.658  
1.649

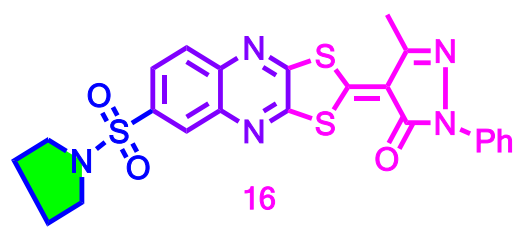

1.24  
1.33  
1.87  
1.18  
1.91  
0.96

4.40  
2.62  
4.46

4 13 12 11 10 9 8 7 6 5 4 3 2 1 0 -1  
f1 (ppm)

3400  
3200  
3000  
2800  
2600  
2400  
2200  
2000  
1800  
1600  
1400  
1200  
1000  
800  
600  
400  
200  
0  
-200



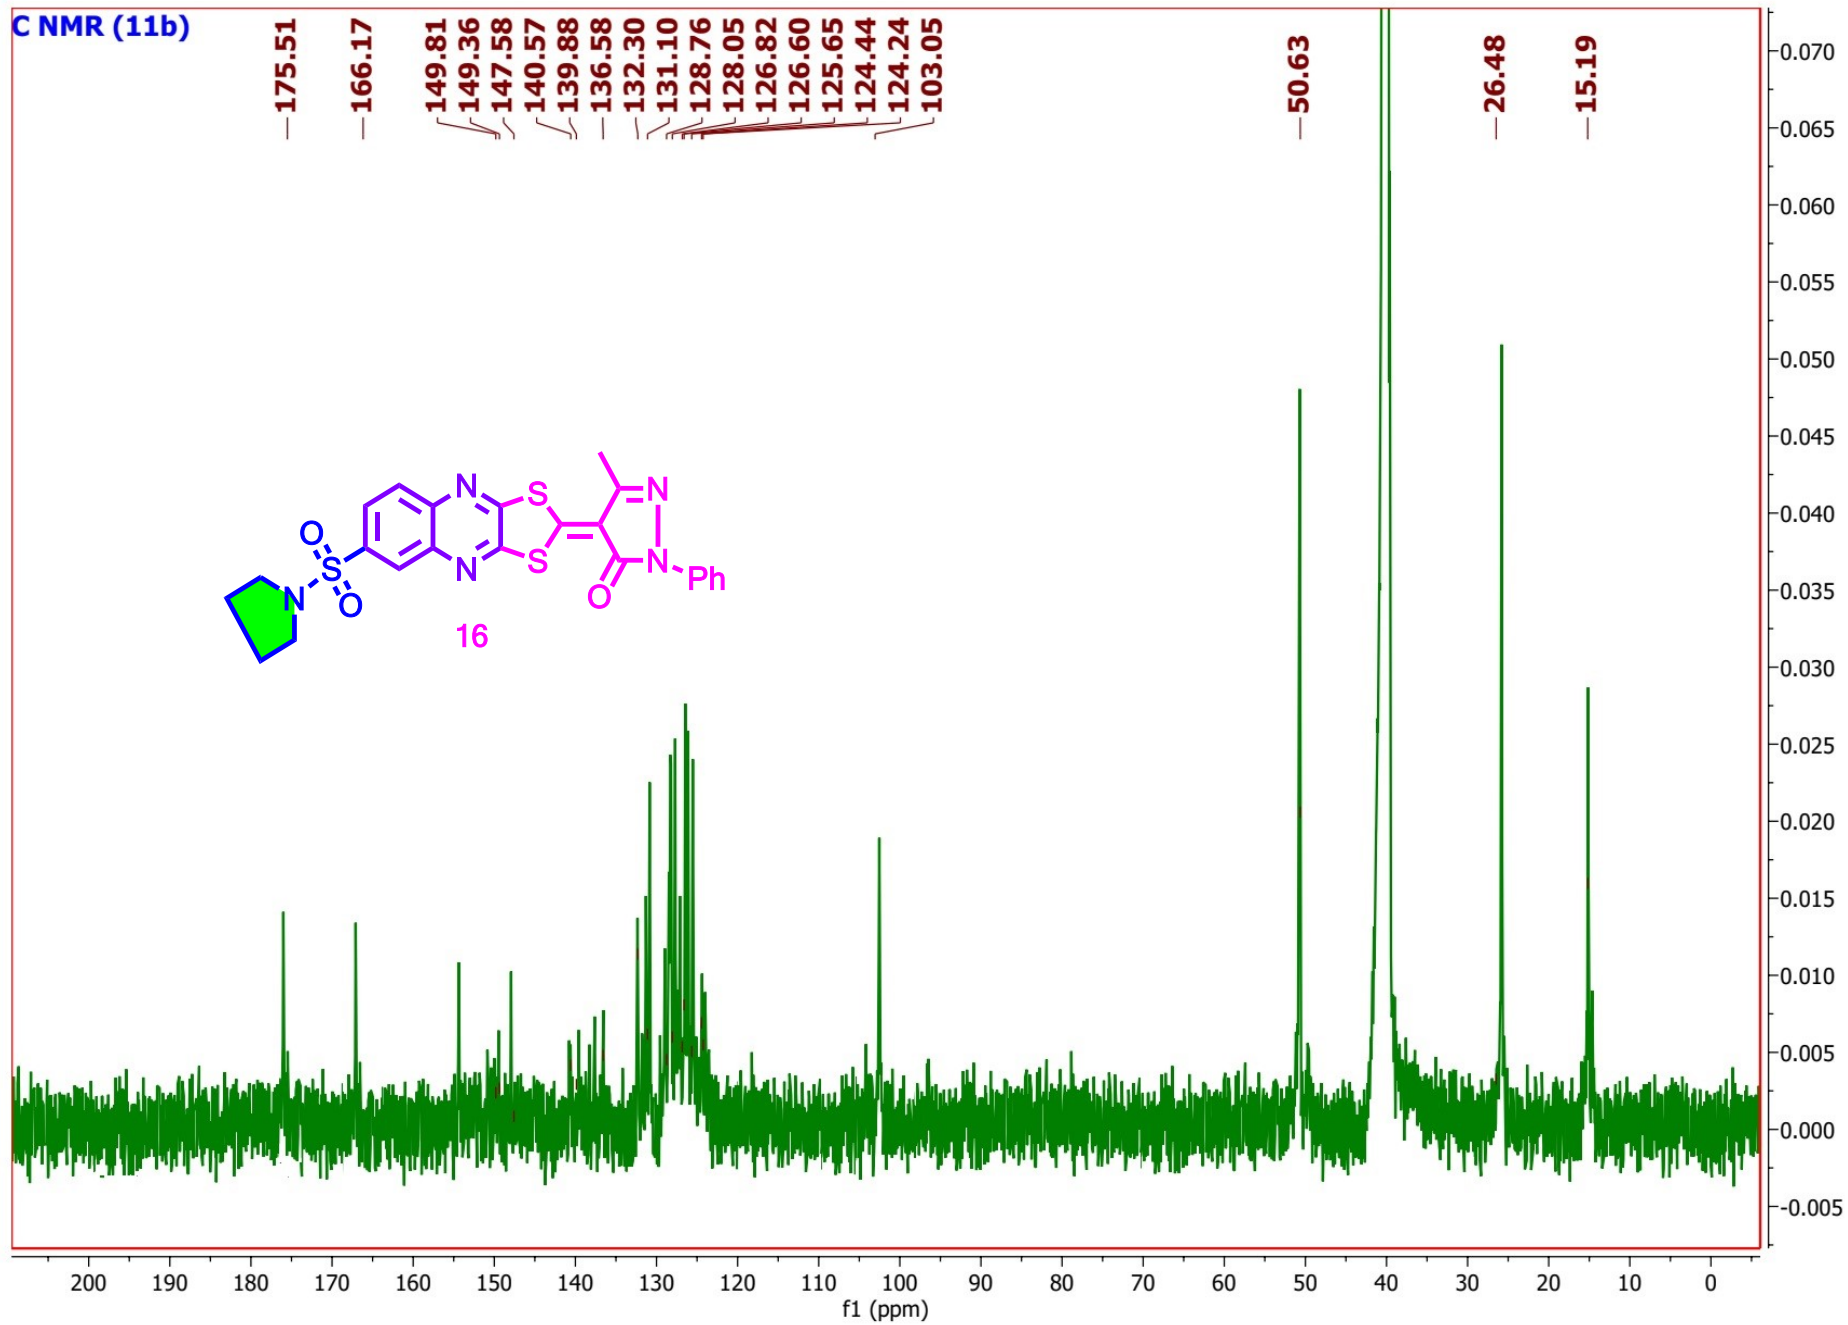

ahmed-18 #158-159 RT: 2.63-2.68 AV: 4 SB: 17 2.81-2.90, 2.61-2.78 NL: 8.77E1

T: + cEI Full ms [40.00-1000.00]

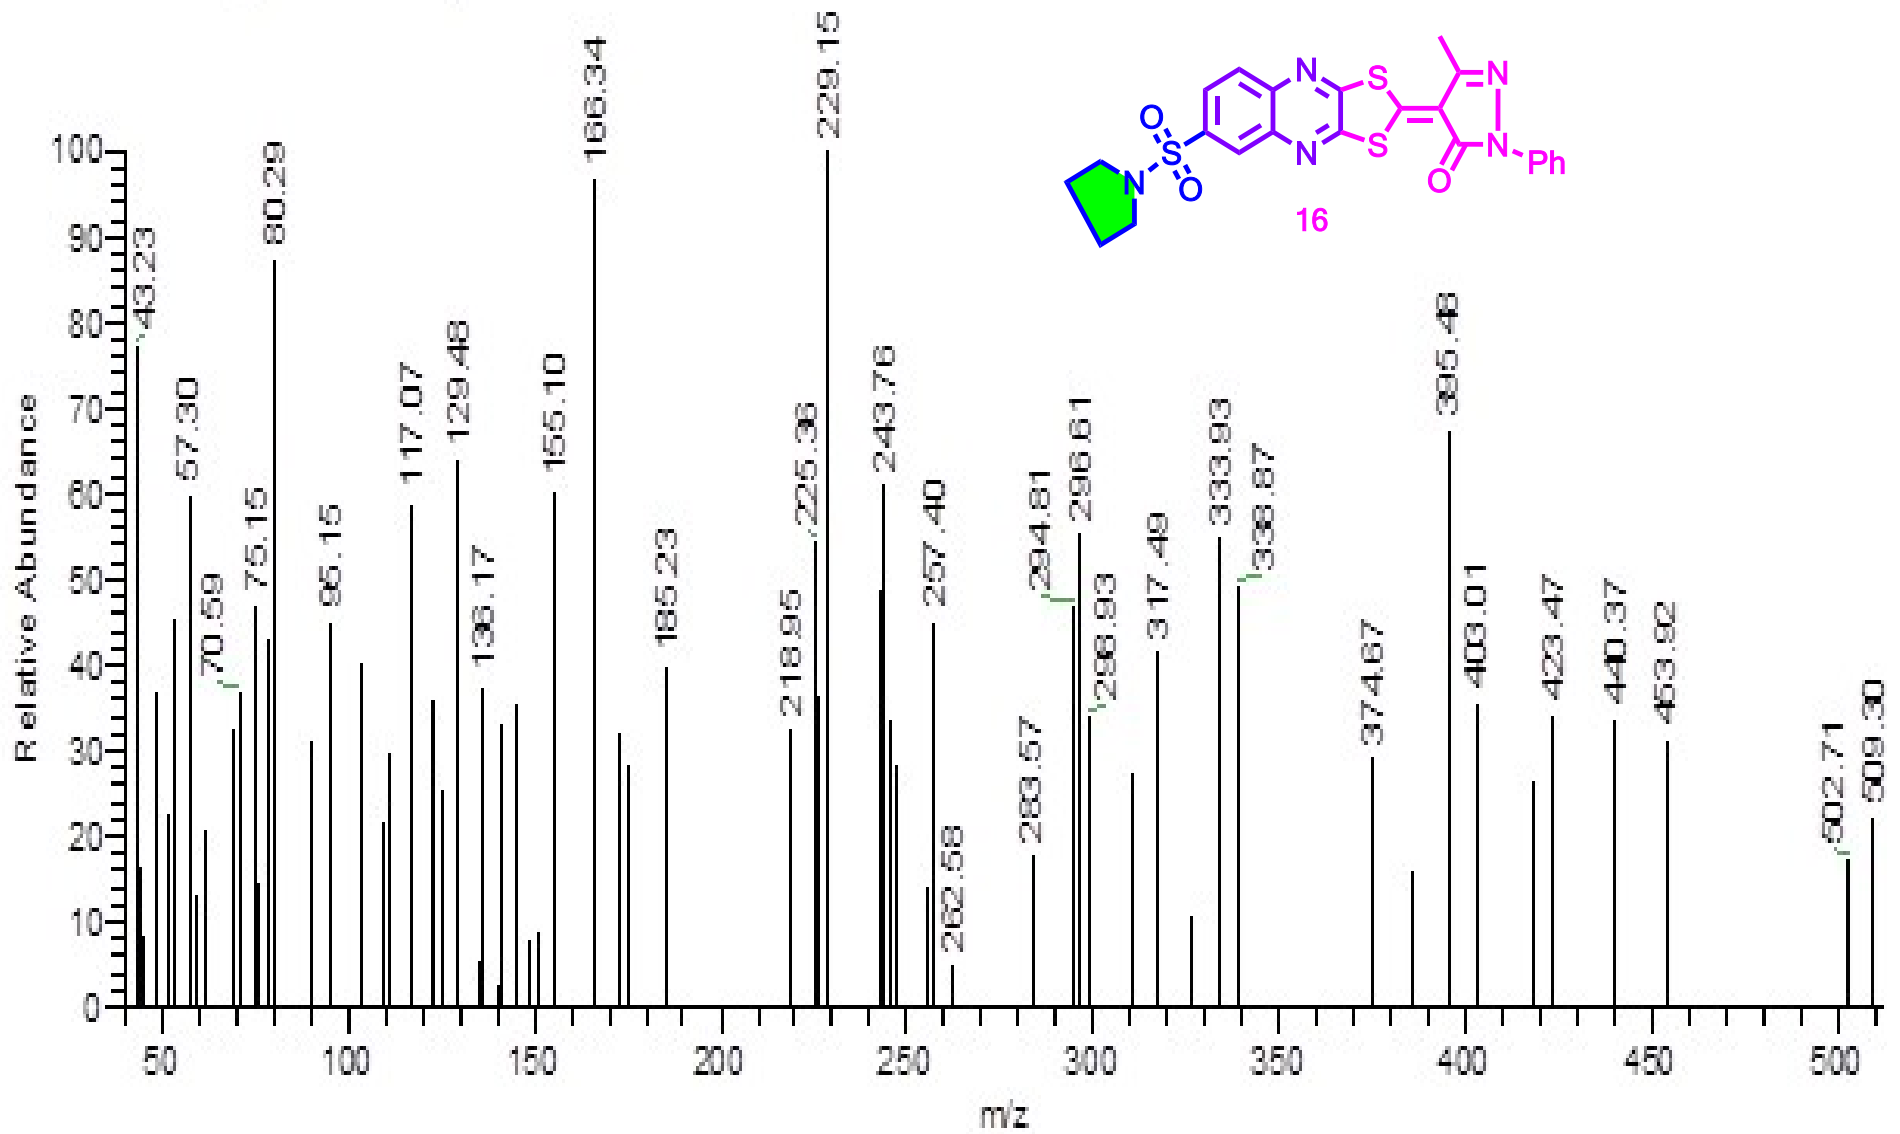

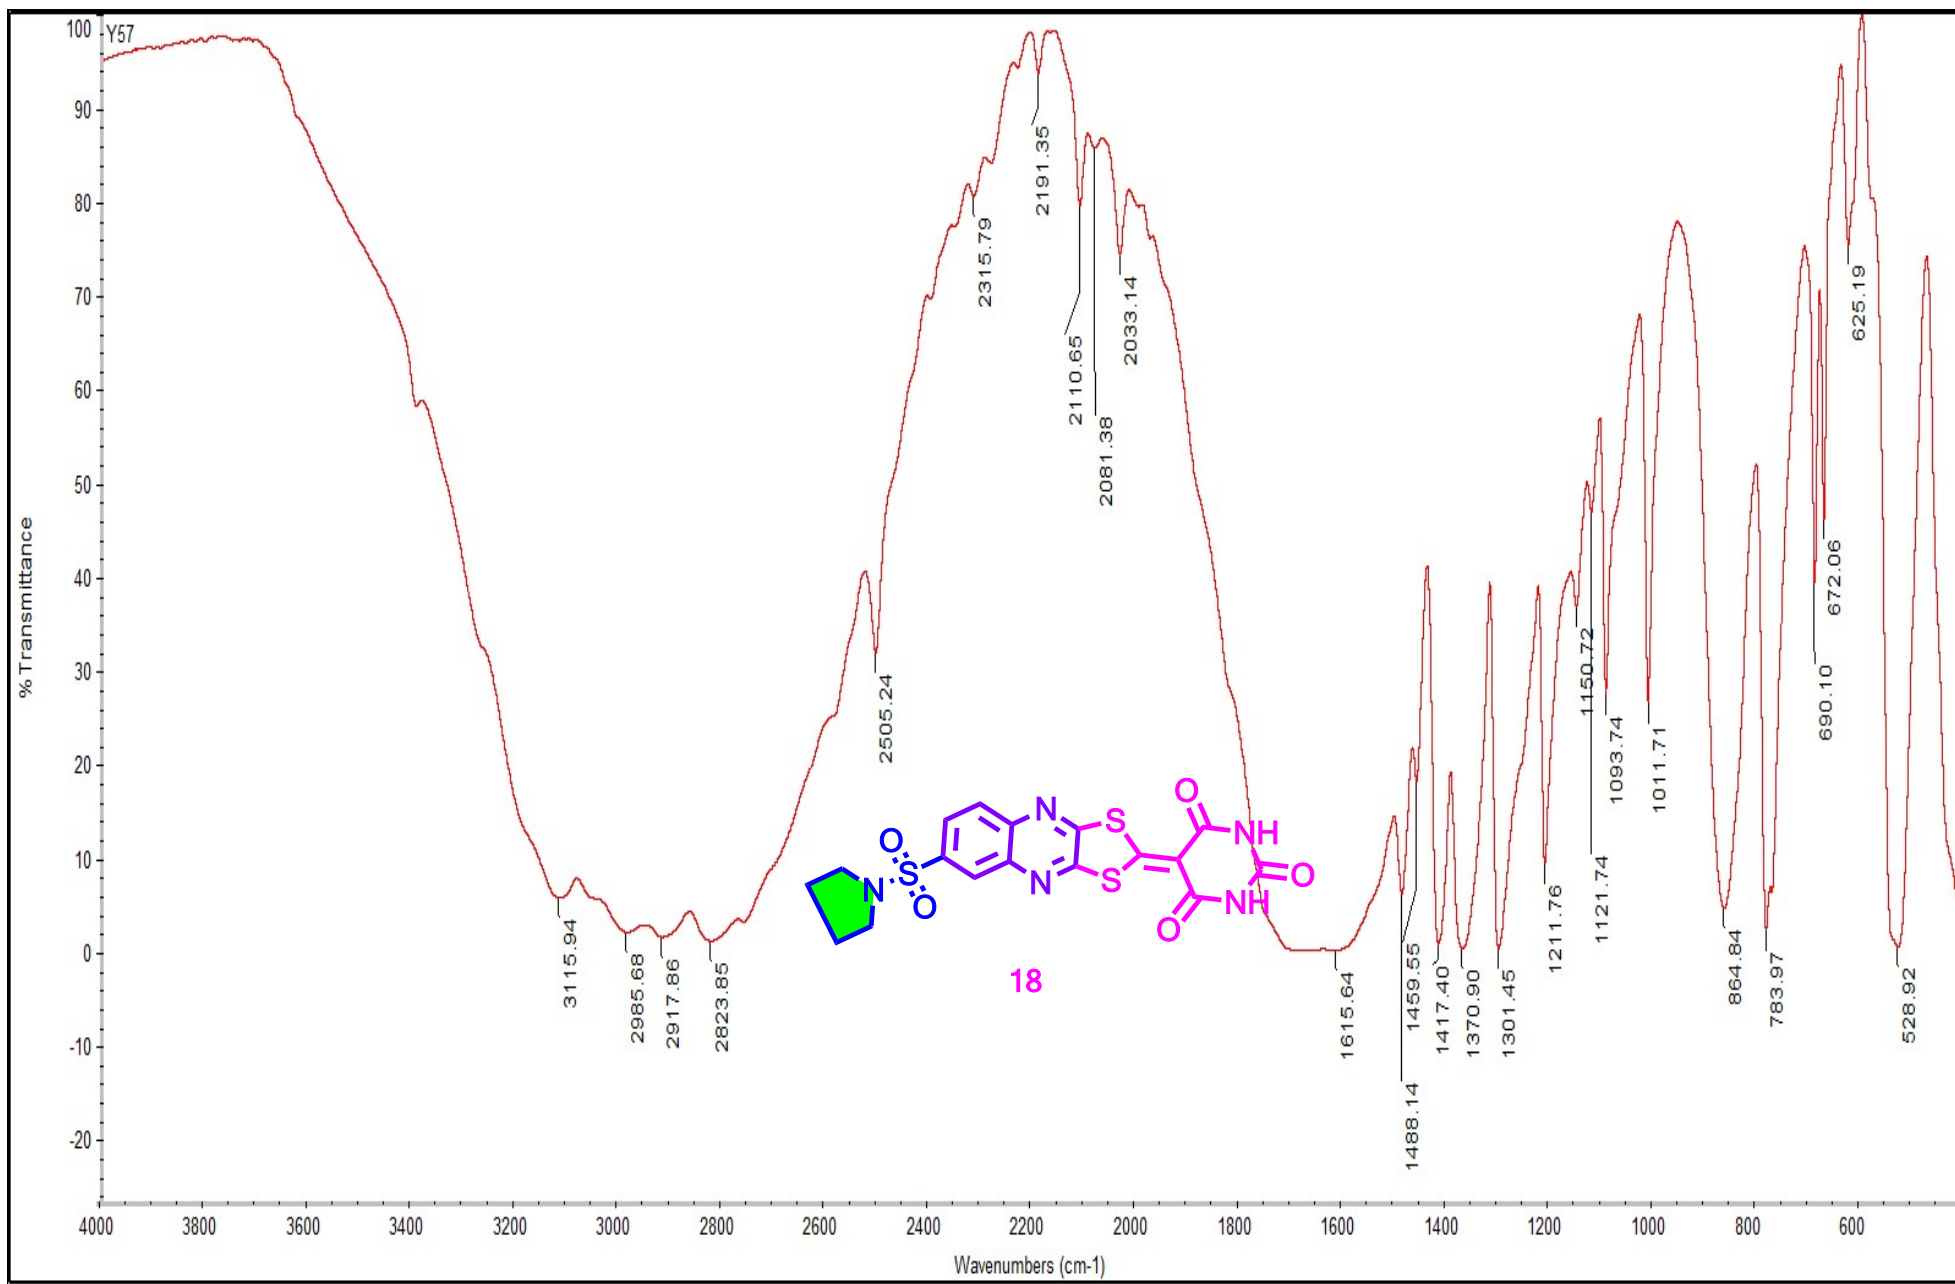

H NMR (12)

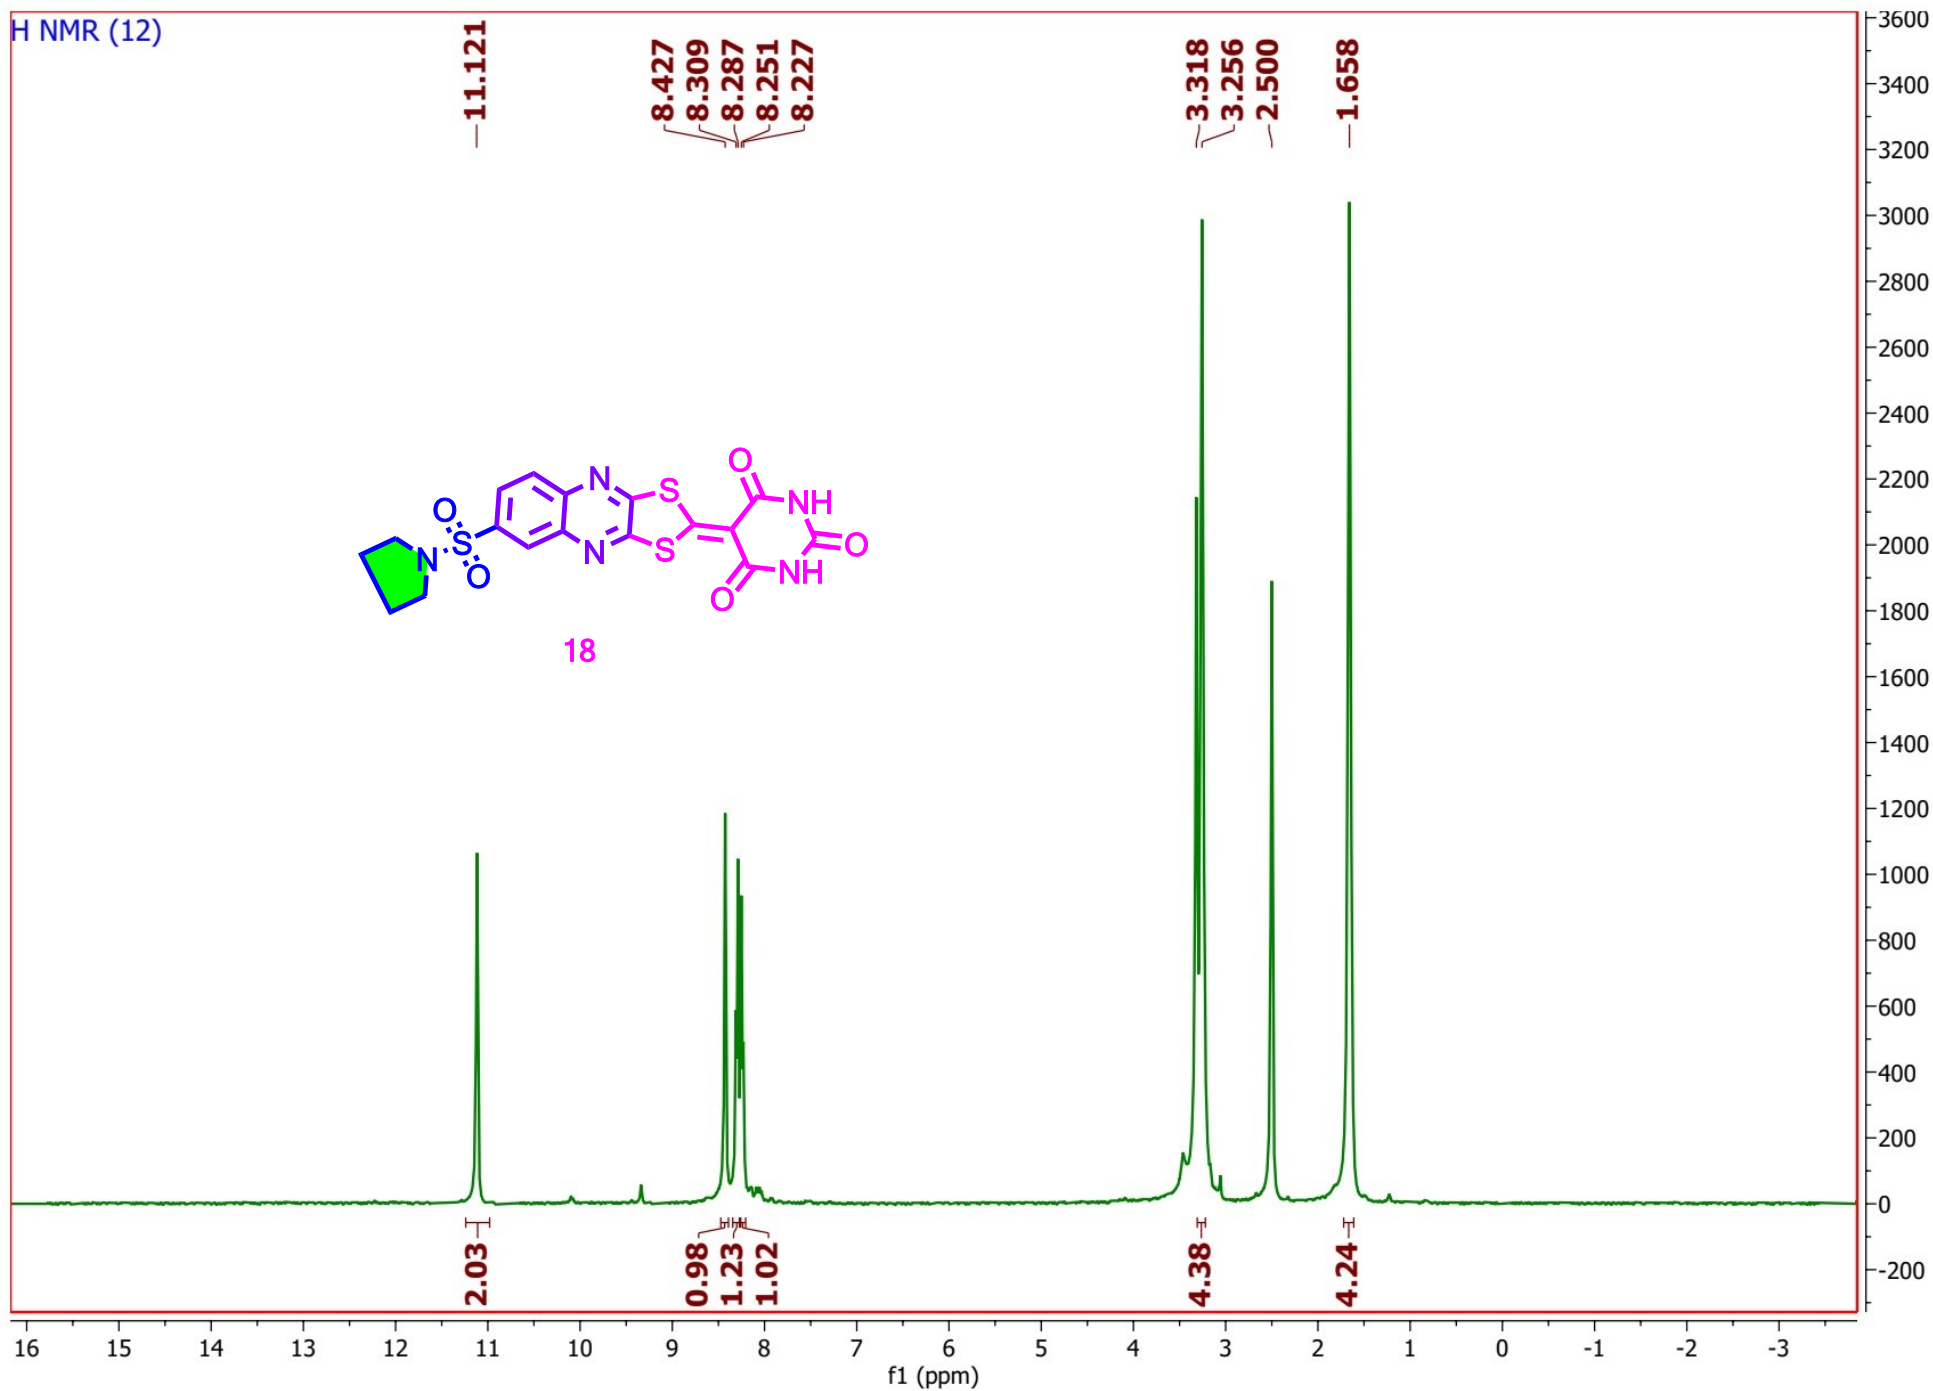

C NMR (12)

168.13  
160.41  
157.97  
152.13  
147.81  
147.37  
142.15  
140.00  
139.44  
136.03  
130.30  
128.91  
127.79

105.37

48.30

25.37

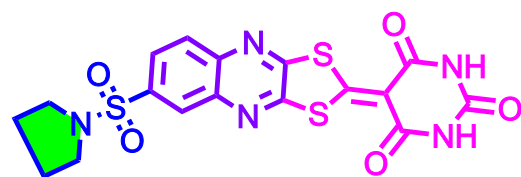

18

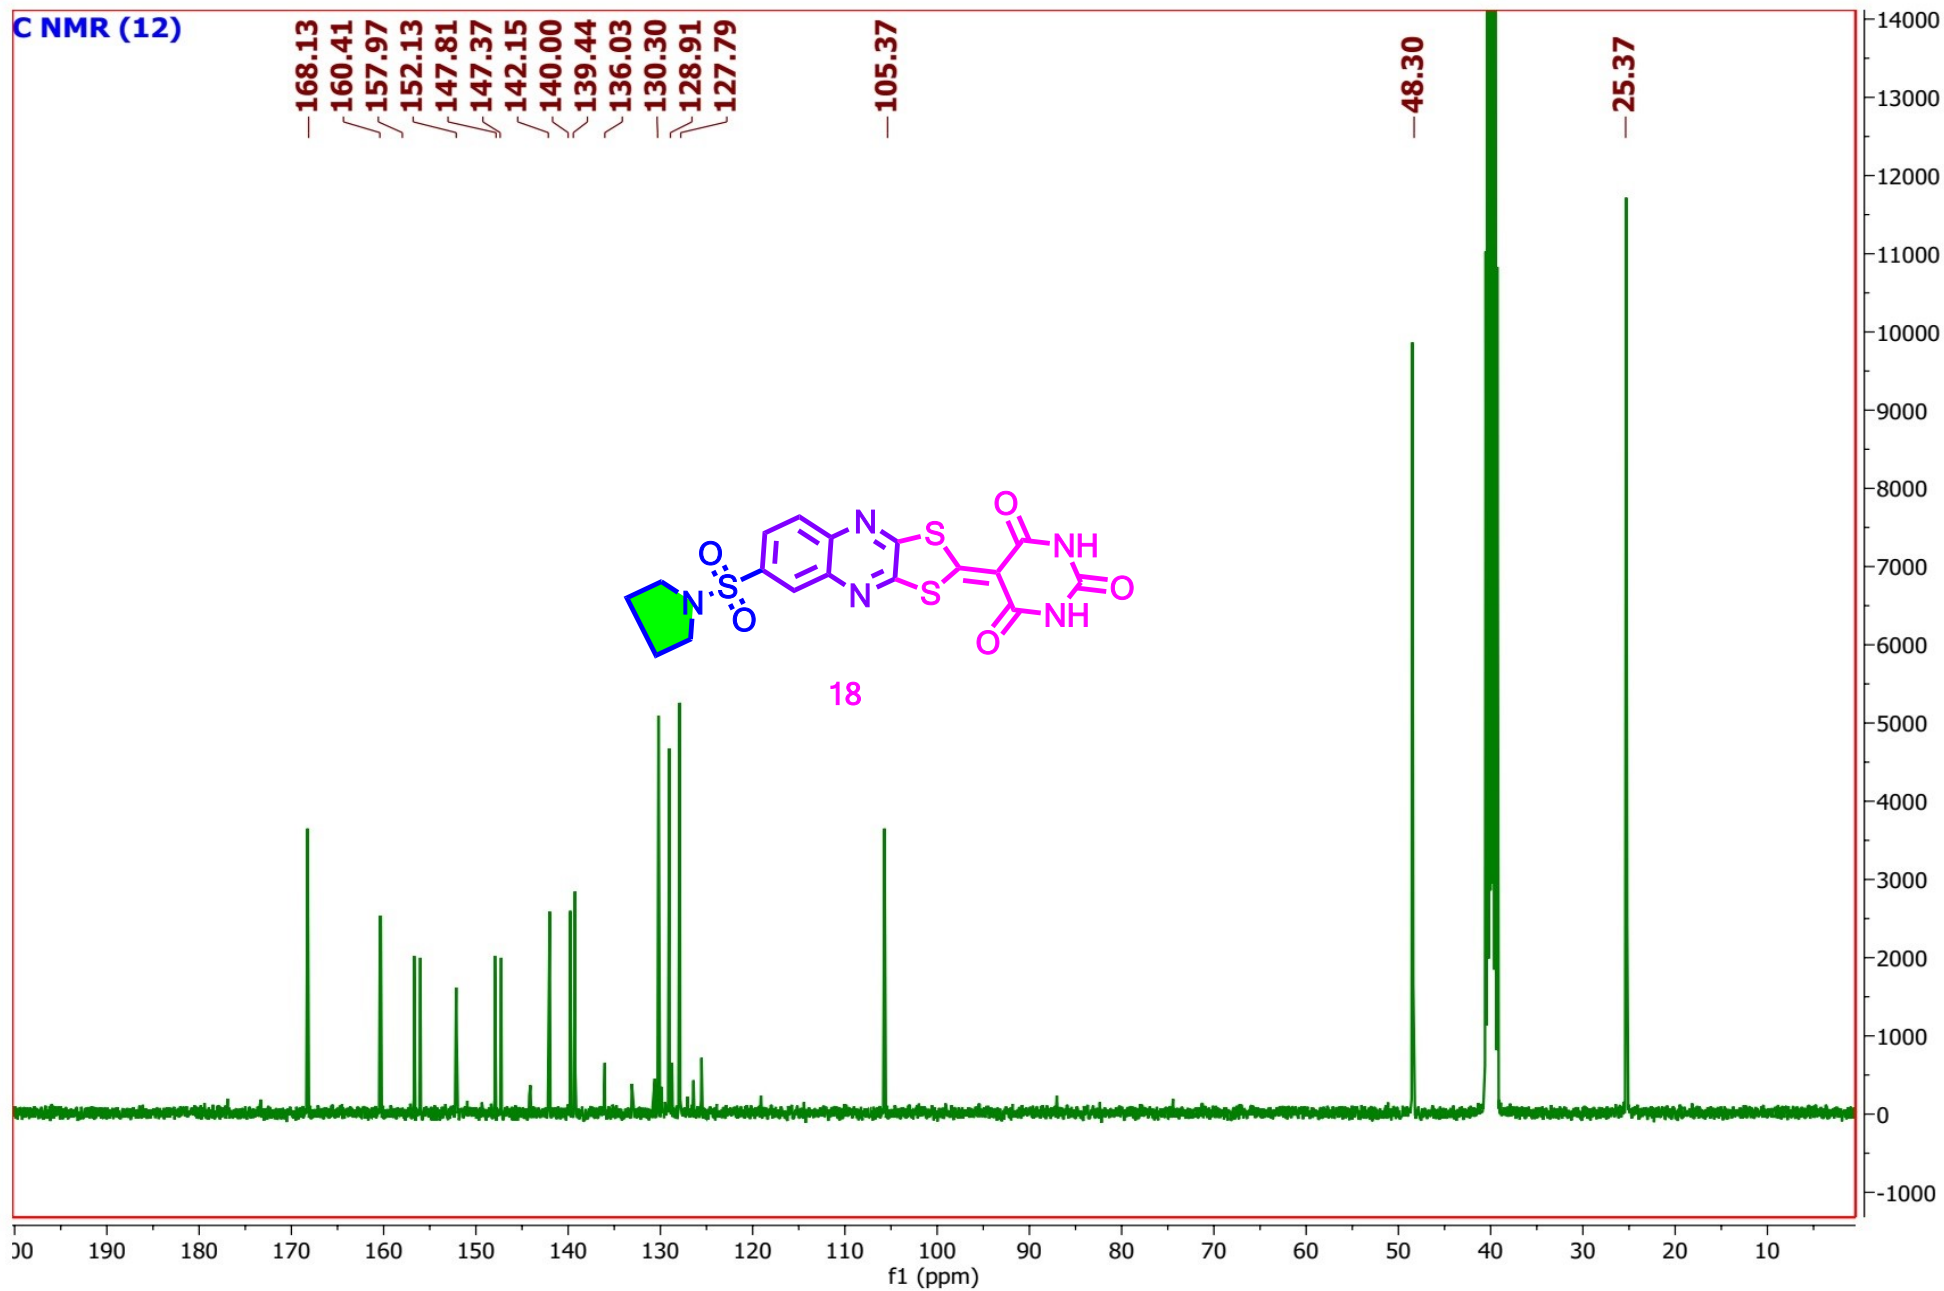

**Biological evaluation  
supplementary material**

## Cytotoxicity assay

### Materials and methods

#### *Cell line*

Hepatocellular carcinoma (HEPG-2) , Mammary gland breast cancer (MCF-7) Colorectal carcinoma Colon cancer (HCT-116), Human lung fibroblast (WI38) and Breast cancer (MDA-MB-231). The cell lines were obtained from ATCC via Holding company for biological products and vaccines (VACSERA), Cairo, Egypt.

Doxorubicin was used as a standard anticancer drug for comparison.

#### *Chemical reagents*

The reagents RPMI-1640 medium , MTT and DMSO (sigma co., St. Louis, USA), Fetal Bovine serum (GIBCO, UK) .

#### *MTT assay*

The cell lines mentioned above were used to determine the inhibitory effects of compounds on cell growth using the MTT assay. This colorimetric assay is based on the conversion of the yellow tetrazolium bromide (MTT) to a purple formazan derivative by mitochondrial succinate dehydrogenase in viable cells. Cell lines were cultured in RPMI-1640 medium with 10% fetal bovine serum. Antibiotics added were 100 units/ml penicillin and 100µg/ml streptomycin at 37 C in a 5% CO<sub>2</sub> incubator. The cell lines were seeds in a 96-well plate at a density of 1.0x10<sup>4</sup> cells/well. at 37 C for 48 h under 5% CO<sub>2</sub>. After incubation the cells were treated with different concentration of compounds and incubated for 24 h. After 24 h of drug treatment, 20 µl of MTT solution at 5mg/ml was added and incubated for 4 h. Dimethyl sulfoxide (DMSO) in volume of 100 µl is added into each well to dissolve the purple formazan formed. The colorimetric assay is measured and recorded at absorbance of 570 nm using a plate reader (EXL 800 , USA). The relative cell viability in percentage was calculated as (A<sub>570</sub> of treated samples/A<sub>570</sub> of untreated sample) X 100.

## Average of Relative viability of cells (%)

| Conc. ( $\mu$ M) | HePG-2      | HCT-116     | MCF-7       |
|------------------|-------------|-------------|-------------|
| <b>DOX</b>       |             |             |             |
| <b>100</b>       | <b>6.3</b>  | <b>7.1</b>  | <b>6.2</b>  |
| <b>50</b>        | <b>11.2</b> | <b>13.9</b> | <b>10.9</b> |
| <b>25</b>        | <b>14.1</b> | <b>18.7</b> | <b>14.3</b> |
| <b>12.5</b>      | <b>28.3</b> | <b>31.4</b> | <b>26.9</b> |
| <b>6.25</b>      | <b>45.8</b> | <b>47.9</b> | <b>41.5</b> |
| <b>3.125</b>     | <b>57.6</b> | <b>60.5</b> | <b>58.4</b> |
| <b>1.56</b>      | <b>71.2</b> | <b>73.8</b> | <b>69.1</b> |
| <b>10b</b>       |             |             |             |
| <b>100</b>       | <b>48.2</b> | <b>50.1</b> | <b>45.4</b> |
| <b>50</b>        | <b>59.3</b> | <b>61.9</b> | <b>58.6</b> |
| <b>25</b>        | <b>72.1</b> | <b>74.2</b> | <b>71.8</b> |
| <b>12.5</b>      | <b>84.5</b> | <b>96.5</b> | <b>85.1</b> |
| <b>6.25</b>      | <b>100</b>  | <b>100</b>  | <b>98.5</b> |
| <b>3.125</b>     | <b>100</b>  | <b>100</b>  | <b>100</b>  |
| <b>1.56</b>      | <b>100</b>  | <b>100</b>  | <b>100</b>  |
| <b>7</b>         |             |             |             |
| <b>100</b>       | <b>36.4</b> | <b>29.8</b> | <b>31.5</b> |
| <b>50</b>        | <b>48.1</b> | <b>44.7</b> | <b>42.6</b> |
| <b>25</b>        | <b>63.8</b> | <b>59.3</b> | <b>50.7</b> |
| <b>12.5</b>      | <b>74.2</b> | <b>64.1</b> | <b>60.3</b> |
| <b>6.25</b>      | <b>95.3</b> | <b>95.4</b> | <b>77.4</b> |
| <b>3.125</b>     | <b>100</b>  | <b>100</b>  | <b>98.9</b> |
| <b>1.56</b>      | <b>100</b>  | <b>100</b>  | <b>100</b>  |
| <b>14</b>        |             |             |             |
| <b>100</b>       | <b>44.7</b> | <b>45.8</b> | <b>43.2</b> |
| <b>50</b>        | <b>56.1</b> | <b>54.9</b> | <b>58.5</b> |



|              |             |             |             |
|--------------|-------------|-------------|-------------|
| <b>25</b>    | <b>69.3</b> | <b>72.3</b> | <b>70.3</b> |
| <b>12.5</b>  | <b>79.6</b> | <b>83.4</b> | <b>81.7</b> |
| <b>6.25</b>  | <b>97.5</b> | <b>98.7</b> | <b>98.1</b> |
| <b>3.125</b> | <b>100</b>  | <b>100</b>  | <b>100</b>  |
| <b>1.56</b>  | <b>100</b>  | <b>100</b>  | <b>100</b>  |
| <b>10e</b>   |             |             |             |
| <b>100</b>   | <b>36.0</b> | <b>29.5</b> | <b>23.7</b> |
| <b>50</b>    | <b>46.5</b> | <b>34.6</b> | <b>37.8</b> |
| <b>25</b>    | <b>55.7</b> | <b>43.0</b> | <b>46.3</b> |
| <b>12.5</b>  | <b>67.5</b> | <b>56.8</b> | <b>58.1</b> |
| <b>6.25</b>  | <b>94.9</b> | <b>69.7</b> | <b>76.5</b> |
| <b>3.125</b> | <b>100</b>  | <b>88.3</b> | <b>95.0</b> |
| <b>1.56</b>  | <b>100</b>  | <b>100</b>  | <b>100</b>  |
| <b>12</b>    |             |             |             |
| <b>100</b>   | <b>8.8</b>  | <b>7.6</b>  | <b>4.7</b>  |
| <b>50</b>    | <b>10.4</b> | <b>11.3</b> | <b>9.1</b>  |
| <b>25</b>    | <b>21.5</b> | <b>24.7</b> | <b>16.3</b> |
| <b>12.5</b>  | <b>38.7</b> | <b>34.1</b> | <b>22.8</b> |
| <b>6.25</b>  | <b>59.2</b> | <b>55.9</b> | <b>38.6</b> |
| <b>3.125</b> | <b>70.3</b> | <b>74.6</b> | <b>57.5</b> |
| <b>1.56</b>  | <b>91.6</b> | <b>88.5</b> | <b>67.8</b> |
| <b>18</b>    |             |             |             |
| <b>100</b>   | <b>48.9</b> | <b>55.9</b> | <b>40.3</b> |
| <b>50</b>    | <b>60.4</b> | <b>76.5</b> | <b>52.7</b> |
| <b>25</b>    | <b>73.1</b> | <b>91.2</b> | <b>72.1</b> |
| <b>12.5</b>  | <b>89.2</b> | <b>100</b>  | <b>95.8</b> |
| <b>6.25</b>  | <b>100</b>  | <b>100</b>  | <b>100</b>  |
| <b>3.125</b> | <b>100</b>  | <b>100</b>  | <b>100</b>  |
| <b>1.56</b>  | <b>100</b>  | <b>100</b>  | <b>100</b>  |
| <b>16</b>    |             |             |             |
| <b>100</b>   | <b>56.1</b> | <b>54.3</b> | <b>49.6</b> |
| <b>50</b>    | <b>76.2</b> | <b>72.5</b> | <b>61.5</b> |
| <b>25</b>    | <b>87.5</b> | <b>84.7</b> | <b>73.2</b> |
| <b>12.5</b>  | <b>100</b>  | <b>97.6</b> | <b>95.8</b> |
| <b>6.25</b>  | <b>100</b>  | <b>100</b>  | <b>100</b>  |

|              |             |             |             |
|--------------|-------------|-------------|-------------|
| <b>3.125</b> | <b>100</b>  | <b>100</b>  | <b>100</b>  |
| <b>1.56</b>  | <b>100</b>  | <b>100</b>  | <b>100</b>  |
| <b>10c</b>   |             |             |             |
| <b>100</b>   | <b>21.5</b> | <b>7.9</b>  | <b>6.9</b>  |
| <b>50</b>    | <b>28.3</b> | <b>16.1</b> | <b>14.6</b> |
| <b>25</b>    | <b>37.0</b> | <b>28.7</b> | <b>22.0</b> |
| <b>12.5</b>  | <b>50.1</b> | <b>37.8</b> | <b>31.8</b> |
| <b>6.25</b>  | <b>71.8</b> | <b>61.4</b> | <b>55.3</b> |
| <b>3.125</b> | <b>92.1</b> | <b>74.6</b> | <b>64.0</b> |
| <b>1.56</b>  | <b>100</b>  | <b>89.2</b> | <b>73.8</b> |
| <b>10f</b>   |             |             |             |
| <b>100</b>   | <b>22.3</b> | <b>15.0</b> | <b>8.9</b>  |
| <b>50</b>    | <b>40.1</b> | <b>27.1</b> | <b>16.2</b> |
| <b>25</b>    | <b>48.8</b> | <b>33.7</b> | <b>21.6</b> |
| <b>12.5</b>  | <b>60.7</b> | <b>43.1</b> | <b>37.4</b> |
| <b>6.25</b>  | <b>80.2</b> | <b>64.2</b> | <b>59.5</b> |
| <b>3.125</b> | <b>98.5</b> | <b>76.5</b> | <b>74.1</b> |
| <b>1.56</b>  | <b>100</b>  | <b>100</b>  | <b>95.2</b> |
| <b>10a</b>   |             |             |             |
| <b>100</b>   | <b>50.7</b> | <b>51.1</b> | <b>48.7</b> |
| <b>50</b>    | <b>61.4</b> | <b>63.7</b> | <b>59.2</b> |
| <b>25</b>    | <b>75.8</b> | <b>78.9</b> | <b>68.3</b> |
| <b>12.5</b>  | <b>88.6</b> | <b>92.6</b> | <b>89.5</b> |
| <b>6.25</b>  | <b>100</b>  | <b>100</b>  | <b>99.6</b> |
| <b>3.125</b> | <b>100</b>  | <b>100</b>  | <b>100</b>  |
| <b>1.56</b>  | <b>100</b>  | <b>100</b>  | <b>100</b>  |
| <b>10d</b>   |             |             |             |
| <b>100</b>   | <b>29.4</b> | <b>20.6</b> | <b>11.6</b> |
| <b>50</b>    | <b>41.6</b> | <b>29.7</b> | <b>18.1</b> |
| <b>25</b>    | <b>53.7</b> | <b>36.9</b> | <b>30.3</b> |
| <b>12.5</b>  | <b>65.3</b> | <b>53.5</b> | <b>44.0</b> |
| <b>6.25</b>  | <b>77.1</b> | <b>74.2</b> | <b>61.2</b> |
| <b>3.125</b> | <b>98.5</b> | <b>97.8</b> | <b>82.5</b> |
| <b>1.56</b>  | <b>100</b>  | <b>100</b>  | <b>99.4</b> |

## Average of Relative viability of cells (%)

| Conc. ( $\mu$ M) | WI38        | MDA-231     |
|------------------|-------------|-------------|
| <b>DOX</b>       |             |             |
| <b>100</b>       | <b>7.8</b>  | <b>4.1</b>  |
| <b>50</b>        | <b>14.5</b> | <b>11.8</b> |
| <b>25</b>        | <b>21.2</b> | <b>16.2</b> |
| <b>12.5</b>      | <b>34.0</b> | <b>27.3</b> |
| <b>6.25</b>      | <b>50.3</b> | <b>36.1</b> |
| <b>3.125</b>     | <b>64.9</b> | <b>52.6</b> |
| <b>1.56</b>      | <b>87.4</b> | <b>61.7</b> |
| <b>10c</b>       |             |             |
| <b>100</b>       | <b>43.0</b> | <b>12.9</b> |
| <b>50</b>        | <b>55.4</b> | <b>18.4</b> |
| <b>25</b>        | <b>67.5</b> | <b>26.5</b> |
| <b>12.5</b>      | <b>80.8</b> | <b>37.8</b> |
| <b>6.25</b>      | <b>96.1</b> | <b>68.3</b> |
| <b>3.125</b>     | <b>100</b>  | <b>77.1</b> |
| <b>1.56</b>      | <b>100</b>  | <b>95.0</b> |
| <b>10f</b>       |             |             |
| <b>100</b>       | <b>36.1</b> | <b>3.7</b>  |
| <b>50</b>        | <b>48.2</b> | <b>8.1</b>  |
| <b>25</b>        | <b>60.1</b> | <b>13.8</b> |
| <b>12.5</b>      | <b>71.7</b> | <b>20.9</b> |
| <b>6.25</b>      | <b>94.5</b> | <b>32.6</b> |
| <b>3.125</b>     | <b>100</b>  | <b>49.2</b> |
| <b>1.56</b>      | <b>100</b>  | <b>57.5</b> |
| <b>12</b>        |             |             |
| <b>100</b>       | <b>47.9</b> | <b>8.2</b>  |
| <b>50</b>        | <b>61.3</b> | <b>14.9</b> |
| <b>25</b>        | <b>70.8</b> | <b>23.4</b> |
| <b>12.5</b>      | <b>86.4</b> | <b>34.0</b> |

|              |             |             |
|--------------|-------------|-------------|
| <b>6.25</b>  | <b>99.7</b> | <b>55.7</b> |
| <b>3.125</b> | <b>100</b>  | <b>69.8</b> |
| <b>1.56</b>  | <b>100</b>  | <b>88.6</b> |

## Lab Report

| ser | Compound           |             | EGFR         | SD<br>± |
|-----|--------------------|-------------|--------------|---------|
|     | code               | MW<br>g/mol | IC50<br>uM   |         |
| 1   | <b>12/M10</b>      | 419.53      | <b>0.19</b>  | 0.009   |
| *   | <b>Erlotenib</b>   | 393.436     | <b>0.037</b> | 0.002   |
| **  | <b>Doxorubicin</b> | 543.52      | <b>0.349</b> | 0.016   |

### Detailed Results

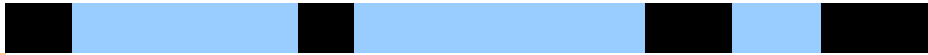

| EGFR                                                                                |      |      |     |       |    |    |    |       |      |       |        |            |
|-------------------------------------------------------------------------------------|------|------|-----|-------|----|----|----|-------|------|-------|--------|------------|
| code                                                                                | IC50 | conc | log | %inh  | T2 | T1 | ΔT | RFU2  | RFU1 | ΔRFU  | slope  | K.Activity |
| 12/M10                                                                              |      | 100  | 2   | 90.98 | 30 | 0  | 30 | 9.02  | 0    | 9.02  | 3.3333 | 10.8241    |
|  |      | 10   | 1   | 85.41 | 30 | 0  | 30 | 14.59 | 0    | 14.59 | 3.3333 | 17.5082    |
|                                                                                     |      | 1    | 0   | 66.96 | 30 | 0  | 30 | 33.04 | 0    | 33.04 | 3.3333 | 39.6484    |
|                                                                                     |      | 0.1  | -1  | 42.45 | 30 | 0  | 30 | 57.55 | 0    | 57.55 | 3.3333 | 69.0607    |

|    |      |    |       |    |   |    |       |   |       |        |         |
|----|------|----|-------|----|---|----|-------|---|-------|--------|---------|
|    | 0.01 | -2 | 26.36 | 30 | 0 | 30 | 73.64 | 0 | 73.64 | 3.3333 | 88.3689 |
| EC |      |    | 0     | 30 | 0 | 30 | 100   | 0 | 100   | 3.3333 | 120     |

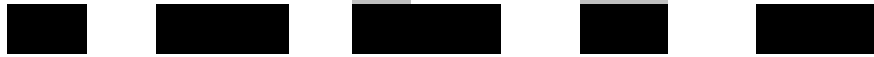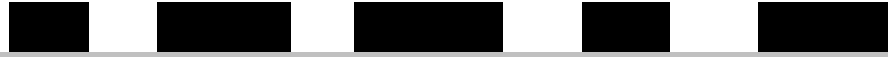

| code | IC50 | conc | log | %inh | T2 | T1 | ΔT | RFU2 | RFU1 | ΔRFU | slope | K.Activity |
|------|------|------|-----|------|----|----|----|------|------|------|-------|------------|
|------|------|------|-----|------|----|----|----|------|------|------|-------|------------|

|                  |  |     |   |       |    |   |    |      |   |      |        |         |
|------------------|--|-----|---|-------|----|---|----|------|---|------|--------|---------|
| <b>Erlotenib</b> |  | 100 | 2 | 95.65 | 30 | 0 | 30 | 4.35 | 0 | 4.35 | 3.3333 | 5.22005 |
|------------------|--|-----|---|-------|----|---|----|------|---|------|--------|---------|

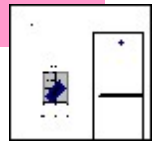

|  |  |      |    |       |    |   |    |       |   |       |        |         |
|--|--|------|----|-------|----|---|----|-------|---|-------|--------|---------|
|  |  | 10   | 1  | 92.48 | 30 | 0 | 30 | 7.52  | 0 | 7.52  | 3.3333 | 9.02409 |
|  |  | 1    | 0  | 78.93 | 30 | 0 | 30 | 21.07 | 0 | 21.07 | 3.3333 | 25.2843 |
|  |  | 0.1  | -1 | 57.82 | 30 | 0 | 30 | 42.18 | 0 | 42.18 | 3.3333 | 50.6165 |
|  |  | 0.01 | -2 | 35.63 | 30 | 0 | 30 | 64.37 | 0 | 64.37 | 3.3333 | 77.2448 |

|    |  |  |  |   |    |   |    |     |   |     |        |     |
|----|--|--|--|---|----|---|----|-----|---|-----|--------|-----|
| EC |  |  |  | 0 | 30 | 0 | 30 | 100 | 0 | 100 | 3.3333 | 120 |
|----|--|--|--|---|----|---|----|-----|---|-----|--------|-----|

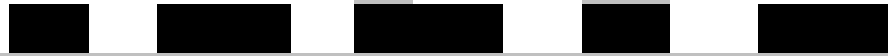

| code | IC50 | conc | log | %inh | T2 | T1 | ΔT | RFU2 | RFU1 | ΔRFU | slope | K.Activity |
|------|------|------|-----|------|----|----|----|------|------|------|-------|------------|
|------|------|------|-----|------|----|----|----|------|------|------|-------|------------|

|            |  |     |   |       |    |   |    |      |   |      |        |         |
|------------|--|-----|---|-------|----|---|----|------|---|------|--------|---------|
| <b>DOX</b> |  | 100 | 2 | 90.61 | 30 | 0 | 30 | 9.39 | 0 | 9.39 | 3.3333 | 11.2681 |
|------------|--|-----|---|-------|----|---|----|------|---|------|--------|---------|

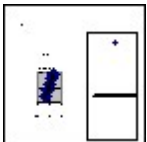

|  |  |      |    |       |    |   |    |       |   |       |        |         |
|--|--|------|----|-------|----|---|----|-------|---|-------|--------|---------|
|  |  | 10   | 1  | 77.59 | 30 | 0 | 30 | 22.41 | 0 | 22.41 | 3.3333 | 26.8923 |
|  |  | 1    | 0  | 61.16 | 30 | 0 | 30 | 38.84 | 0 | 38.84 | 3.3333 | 46.6085 |
|  |  | 0.1  | -1 | 37.48 | 30 | 0 | 30 | 62.52 | 0 | 62.52 | 3.3333 | 75.0248 |
|  |  | 0.01 | -2 | 23.16 | 30 | 0 | 30 | 76.84 | 0 | 76.84 | 3.3333 | 92.2089 |

|    |  |  |  |   |    |   |    |     |   |     |        |     |
|----|--|--|--|---|----|---|----|-----|---|-----|--------|-----|
| EC |  |  |  | 0 | 30 | 0 | 30 | 100 | 0 | 100 | 3.3333 | 120 |
|----|--|--|--|---|----|---|----|-----|---|-----|--------|-----|

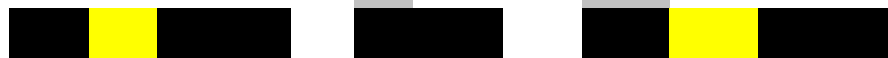

|                  |                       |
|------------------|-----------------------|
| <b>M10</b>       | $y = 17.22x + 62.432$ |
| <b>Erlotenib</b> | $y = 15.47x + 72.102$ |
| <b>DOX</b>       | $y = 17.501x + 58$    |

# Lab Report

| Ser | Sample    |              | EGFR (L858R) | SD<br>± |
|-----|-----------|--------------|--------------|---------|
|     | code      | M.W<br>g/mol | IC50<br>uM   |         |
| 1   | 12/M10    | 419.53       | 0.121        | 0.007   |
| *** | Erlotenib | 393.436      | 0.026        | 0.001   |

## Detailed results

| EGFR-L858R |      |      |     |      |    |    |    |       |      |       |       |            |
|------------|------|------|-----|------|----|----|----|-------|------|-------|-------|------------|
| code       | IC50 | conc | log | %inh | T2 | T1 | ΔT | RFU2  | RFU1 | ΔRFU  | slope | K.Activity |
| 12/ M10    |      | 100  | 2   | 91   | 30 | 0  | 30 | 8.68  | 0    | 8.68  | 3.333 | 10.416     |
|            |      | 10   | 1   | 87   | 30 | 0  | 30 | 17.45 | 0    | 17.45 | 4.333 | 16.10769   |
|            |      | 1    | 0   | 61   | 30 | 0  | 30 | 38.66 | 0    | 38.66 | 3.333 | 46.392     |
|            |      | 0.1  | -1  | 48   | 30 | 0  | 30 | 52.09 | 0    | 52.09 | 3.333 | 62.50801   |
|            |      | 0.01 | -2  | 33   | 30 | 0  | 30 | 66.54 | 0    | 66.54 | 3.333 | 79.84801   |
| EC         |      |      |     | 0    | 30 | 0  | 30 | 100   | 0    | 100   | 3.333 | 120        |

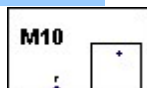

| code      | IC50 | conc.ng/ml | log conc | %inh | T2 | T1 | ΔT | RFU2  | RFU1 | ΔRFU  | slope | K.Activity |
|-----------|------|------------|----------|------|----|----|----|-------|------|-------|-------|------------|
| Erlotenib |      | 100        | 2        | 95   | 30 | 0  | 30 | 4.82  | 0    | 4.82  | 3.333 | 5.784001   |
|           |      | 10         | 1        | 93   | 30 | 0  | 30 | 9.61  | 0    | 9.61  | 4.333 | 8.87077    |
|           |      | 1          | 0        | 79   | 30 | 0  | 30 | 21.08 | 0    | 21.08 | 3.333 | 25.296     |

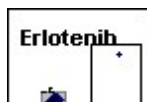

|    |      |    |    |    |   |    |       |   |       |       |          |
|----|------|----|----|----|---|----|-------|---|-------|-------|----------|
|    | 0.1  | -1 | 60 | 30 | 0 | 30 | 39.79 | 0 | 39.79 | 3.333 | 47.748   |
|    | 0.01 | -2 | 39 | 30 | 0 | 30 | 61.38 | 0 | 61.38 | 3.333 | 73.65601 |
| EC |      |    | 0  | 30 | 0 | 30 | 100   | 0 | 100   | 3.333 | 120      |

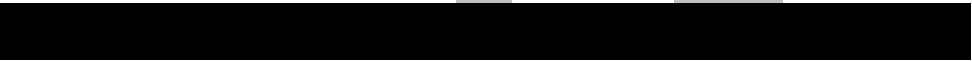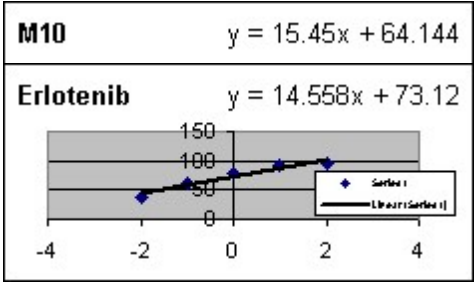

## Lab Report

| ser | Compound  |             | VEGFR2     |  | SD<br>± |
|-----|-----------|-------------|------------|--|---------|
|     | code      | MW<br>g/mol | IC50<br>uM |  |         |
| 1   | 12/M10    | 488         | 0.42       |  | 0.021   |
| *   | sorafenib | 464.825     | 0.035      |  | 0.002   |

### VEGFR2

| code   | IC50 | conc | log | %inh  | T2 | T1 | ΔT | RFU2  | RFU1 | ΔRFU  | slope  | K.Activity |
|--------|------|------|-----|-------|----|----|----|-------|------|-------|--------|------------|
| 12/M10 |      | 100  | 2   | 91.38 | 30 | 0  | 30 | 8.62  | 0    | 8.62  | 3.3333 | 10.3441    |
|        |      | 10   | 1   | 78.92 | 30 | 0  | 30 | 21.08 | 0    | 21.08 | 3.3333 | 25.2963    |

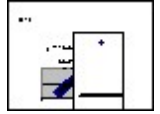

|    |      |    |       |    |   |    |       |   |       |        |         |
|----|------|----|-------|----|---|----|-------|---|-------|--------|---------|
|    | 1    | 0  | 57.04 | 30 | 0 | 30 | 42.96 | 0 | 42.96 | 3.3333 | 51.5525 |
|    | 0.1  | -1 | 36.88 | 30 | 0 | 30 | 63.12 | 0 | 63.12 | 3.3333 | 75.7448 |
|    | 0.01 | -2 | 20.41 | 30 | 0 | 30 | 79.59 | 0 | 79.59 | 3.3333 | 95.509  |
| EC |      |    | 0     | 30 | 0 | 30 | 100   | 0 | 100   | 3.3333 | 120     |

| code | IC50 | conc | log | %inh | T2 | T1 | ΔT | RFU2 | RFU1 | ΔRFU | slope | K.Activity |
|------|------|------|-----|------|----|----|----|------|------|------|-------|------------|
|------|------|------|-----|------|----|----|----|------|------|------|-------|------------|

|           |  |     |   |       |    |   |    |      |   |      |        |         |
|-----------|--|-----|---|-------|----|---|----|------|---|------|--------|---------|
| Sorafenib |  | 100 | 2 | 95.14 | 30 | 0 | 30 | 4.86 | 0 | 4.86 | 3.3333 | 5.83206 |
|-----------|--|-----|---|-------|----|---|----|------|---|------|--------|---------|

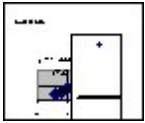

|  |    |   |       |    |   |    |      |   |      |        |        |
|--|----|---|-------|----|---|----|------|---|------|--------|--------|
|  | 10 | 1 | 91.68 | 30 | 0 | 30 | 8.32 | 0 | 8.32 | 3.3333 | 9.9841 |
|--|----|---|-------|----|---|----|------|---|------|--------|--------|

|  |   |   |       |    |   |    |       |   |       |        |         |
|--|---|---|-------|----|---|----|-------|---|-------|--------|---------|
|  | 1 | 0 | 75.08 | 30 | 0 | 30 | 24.92 | 0 | 24.92 | 3.3333 | 29.9043 |
|--|---|---|-------|----|---|----|-------|---|-------|--------|---------|

|  |     |    |       |    |   |    |       |   |       |        |         |
|--|-----|----|-------|----|---|----|-------|---|-------|--------|---------|
|  | 0.1 | -1 | 53.93 | 30 | 0 | 30 | 46.07 | 0 | 46.07 | 3.3333 | 55.2846 |
|--|-----|----|-------|----|---|----|-------|---|-------|--------|---------|

|  |      |    |       |    |   |    |       |   |       |        |         |
|--|------|----|-------|----|---|----|-------|---|-------|--------|---------|
|  | 0.01 | -2 | 40.72 | 30 | 0 | 30 | 59.28 | 0 | 59.28 | 3.3333 | 71.1367 |
|--|------|----|-------|----|---|----|-------|---|-------|--------|---------|

|    |  |  |   |    |   |    |     |   |     |        |     |
|----|--|--|---|----|---|----|-----|---|-----|--------|-----|
| EC |  |  | 0 | 30 | 0 | 30 | 100 | 0 | 100 | 3.3333 | 120 |
|----|--|--|---|----|---|----|-----|---|-----|--------|-----|

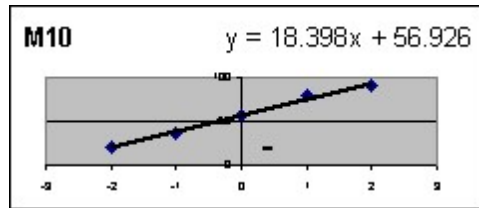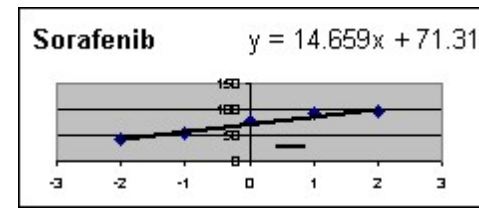



# Lab Report

| Ser | Sample    |       |               | RT-PCR Results |       |       |
|-----|-----------|-------|---------------|----------------|-------|-------|
|     |           |       |               | Fold Change    |       |       |
|     | code      | cells | IC50<br>ug/ml | Bax            | bcl2  | p53   |
| 1   | 12/MCF7   | ---   | ---           | 3.792          | 0.368 | 4.976 |
| 2   | Cont.MCF7 | ---   | ---           | 1              | 1     | 1     |

Detailed results

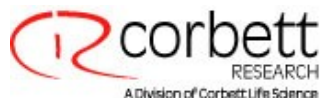

14 Hilly Street Mortlake NSW 2137 Australia  
 T + 61 2 9736 1320  
 F + 61 2 9736 1364  
 W [www.corbettlifescience.com](http://www.corbettlifescience.com)

# Quantitation Report

Experiment Information

|                         |                             |
|-------------------------|-----------------------------|
| Run Name                | Run 2022-10-29 (1)          |
| Run Start               | 2022-10-29 01:44:12 PM      |
| Run Finish              | 2022-10-29 04:26:38 PM      |
| Operator                | ERA                         |
| Notes                   | ---                         |
| Run On Software Version | Rotor-Gene 1.7.87           |
| Run Signature           | The Run Signature is valid. |
| Gain Green              | 10.                         |

|             |      |
|-------------|------|
| Gain Yellow | 9.33 |
|-------------|------|

Quantitation data

This report generated by Rotor-Gene 6000 Series Software 1.7 (Build 87)  
 Copyright ©2000-2006 Corbett Research, a Division of Corbett Life Science. All rights reserved.  
 ISO 9001:2000 (Reg. No. QEC21313)

**Primers**

primers

Bax : F 5'- TCAGGATGCGTCCACCAAGAAG-3',

Bax : R 5'- TGTGTCCACGGCGGCAATCATC-3'.

Bcl2 : F 5'- ATCGCCCTGTGGATGACTGAGT-3',

Bcl2 : R 5'- GCCAGGAGAAATCAAACAGAGGC -3'.

p53 : F 5'- GTTTGAGGACCTTCGACCAGCT-3',

p53 : R 5'- CAACGTACCAGGAGCCACTCTT-3'.

GAPDH : F 5'- GTCTCCTCTGACTTCAACAGCG-3'

GAPDH : R 5'- ACCACCCTGTTGCTGTAGCCAA-3'

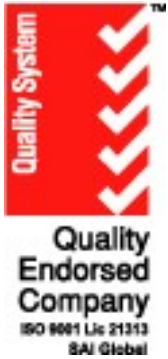

| Sample |           |      | Bax           |       |              |            |       |              |                            |                      |
|--------|-----------|------|---------------|-------|--------------|------------|-------|--------------|----------------------------|----------------------|
|        |           |      | Control cells |       |              | Test cells |       |              |                            | FLD                  |
| Ser    | code      | Conc | GAPDH         | Bax   | $\Delta$ CTC | GAPDH      | Bax   | $\Delta$ CTE | $\Delta\Delta$ CT          | $2^{\Delta\Delta$ CT |
|        |           |      | HC            | TC    | TC-HC        | HE         | TE    | TE-HE        | $\Delta$ CTE- $\Delta$ CTC | E=1.881              |
| 1      | 12/MCF7   |      | 22.39         | 33.64 | 11.25        | 22.15      | 31.29 | 9.14         | -2.11                      | 3.7928               |
| 2      | Cont.MCF7 |      | 22.39         | 33.64 | 11.25        | 22.39      | 33.64 | 11.25        | 0                          | 1                    |

| Sample |           |      | Bcl2          |       |              |            |       |              |                            |                      |
|--------|-----------|------|---------------|-------|--------------|------------|-------|--------------|----------------------------|----------------------|
|        |           |      | Control cells |       |              | Test cells |       |              |                            | FLD                  |
| Ser    | code      | Conc | GAPDH         | Bcl2  | $\Delta$ CTC | GAPDH      | Bcl2  | $\Delta$ CTE | $\Delta\Delta$ CT          | $2^{\Delta\Delta$ CT |
|        |           |      | HC            | TC    | TC-HC        | HE         | TE    | TE-HE        | $\Delta$ CTE- $\Delta$ CTC | E=1.881              |
| 1      | 12/MCF7   |      | 22.39         | 27.41 | 5.02         | 22.15      | 28.75 | 6.6          | 1.58                       | 0.3685               |
| 2      | Cont.MCF7 |      | 22.39         | 27.41 | 5.02         | 22.39      | 27.41 | 5.02         | 0                          | 1                    |

| Sample |           |      | p53           |       |              |            |       |              |                            |                      |
|--------|-----------|------|---------------|-------|--------------|------------|-------|--------------|----------------------------|----------------------|
|        |           |      | Control cells |       |              | Test cells |       |              |                            | FLD                  |
| Ser    | code      | Conc | GAPDH         | p53   | $\Delta$ CTC | GAPDH      | p53   | $\Delta$ CTE | $\Delta\Delta$ CT          | $2^{\Delta\Delta$ CT |
|        |           |      | HC            | TC    | TC-HC        | HE         | TE    | TE-HE        | $\Delta$ CTE- $\Delta$ CTC | E=1.881              |
| 1      | 12/MCF7   |      | 22.39         | 27.41 | 5.02         | 22.15      | 28.75 | 6.6          | 1.58                       | 0.3685               |
| 2      | Cont.MCF7 |      | 22.39         | 27.41 | 5.02         | 22.39      | 27.41 | 5.02         | 0                          | 1                    |

|   |           | HC    | TC    | TC-HC | HE    | TE    | TE-HE | $\Delta$ CTE- $\Delta$ CTC | E=1.881 |
|---|-----------|-------|-------|-------|-------|-------|-------|----------------------------|---------|
| 1 | 12/MCF7   | 22.39 | 32.85 | 10.46 | 22.15 | 30.07 | 7.92  | -2.54                      | 4.9768  |
| 2 | Cont.MCF7 | 22.39 | 32.85 | 10.46 | 22.39 | 32.85 | 10.46 | 0                          | 1       |

## Lab Report

| ser | Sample    |            | DNA content |       |       |                             |
|-----|-----------|------------|-------------|-------|-------|-----------------------------|
|     | code      | IC50<br>uM | %G0-G1      | %S    | %G2/M | Comment                     |
| 1   | M10/MCF7  | 3.82       | 48.16       | 44.52 | 7.32  | cell growth arrest@ S phase |
| 2   | Cont.MCF7 | ---        | 57.66       | 29.79 | 12.55 | ---                         |

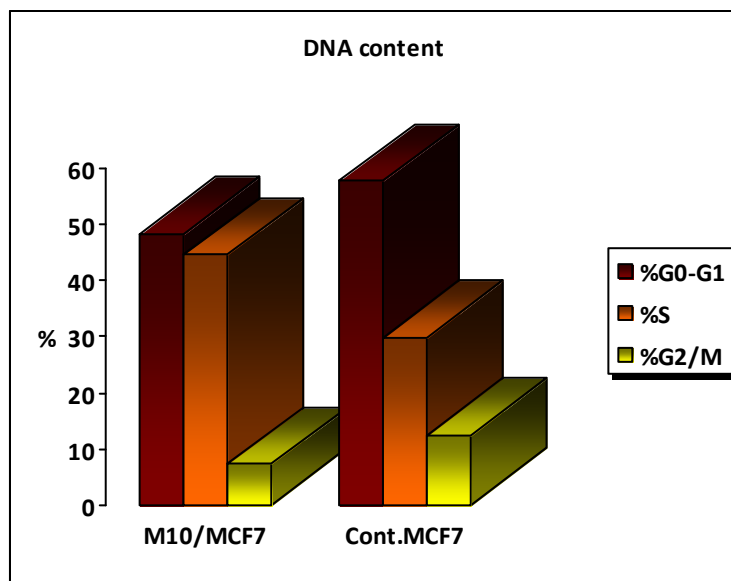

| s | code         | conc | Apoptosis |       |      | Necrosis |
|---|--------------|------|-----------|-------|------|----------|
|   |              |      | Total     | Early | Late |          |
| 1 | 12= M10/MCF7 |      | 42.08     | 24.02 | 11.9 | 6.16     |
| 2 | Cont.MCF7    |      | 1.84      | 0.44  | 0.15 | 1.25     |

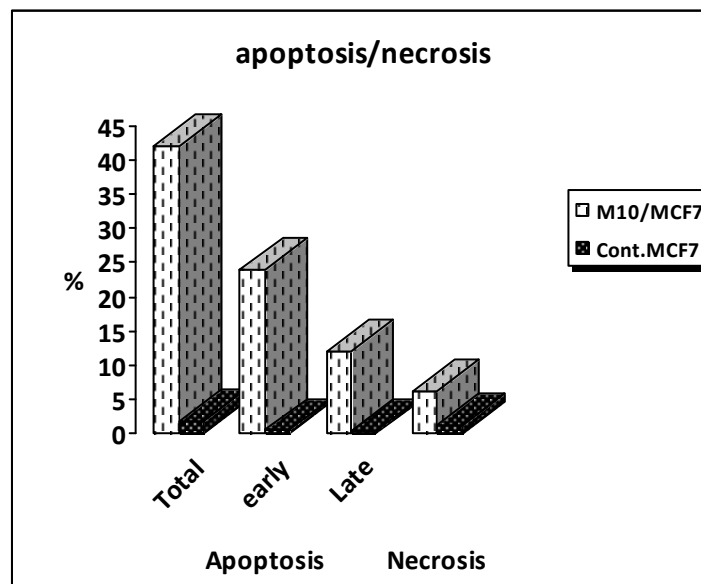

# Detailed results

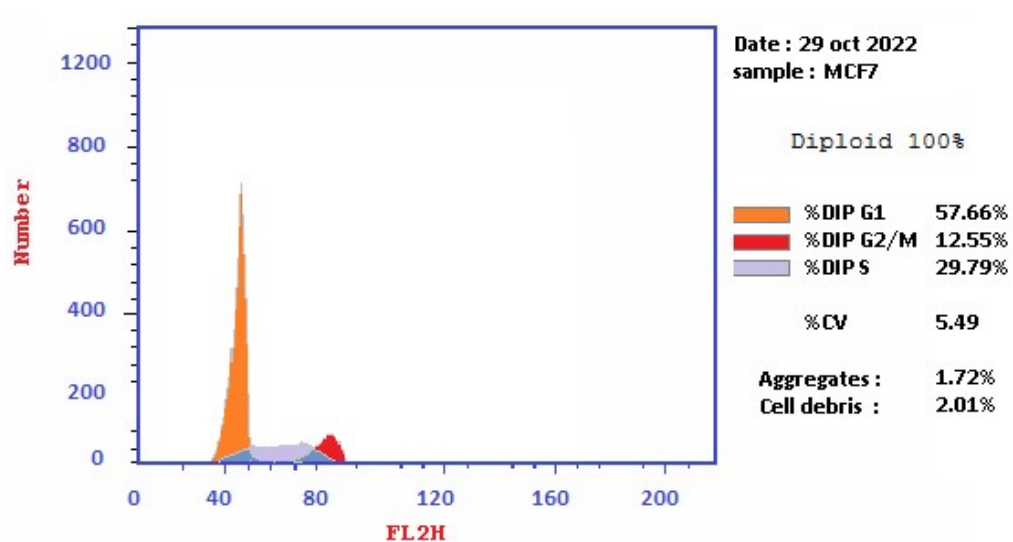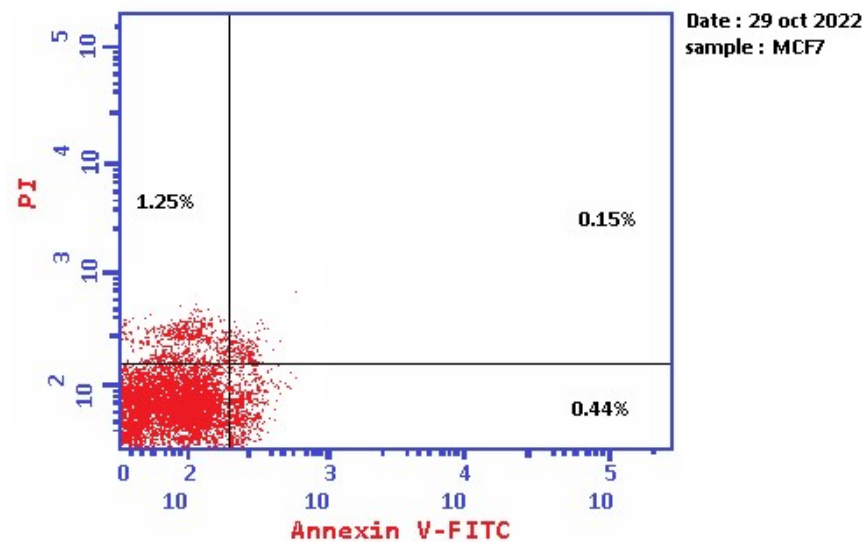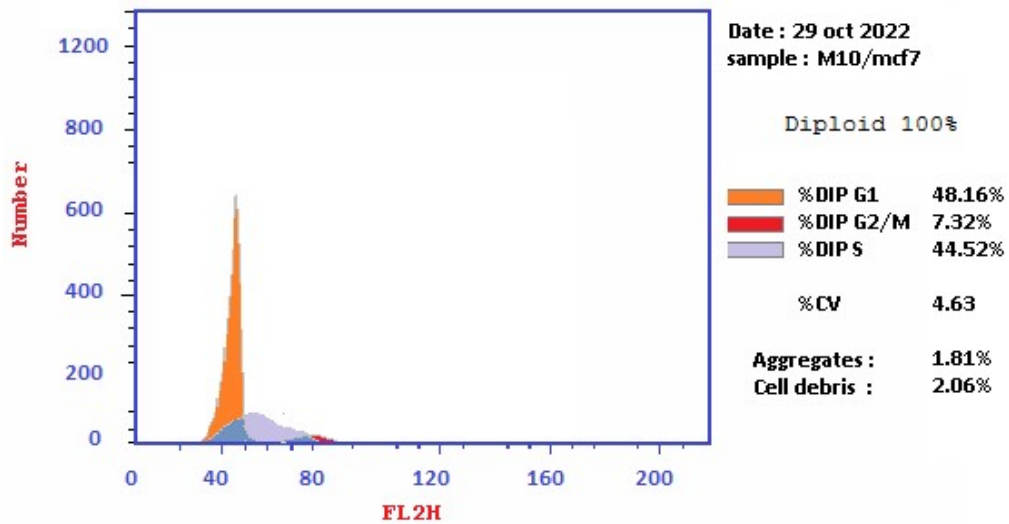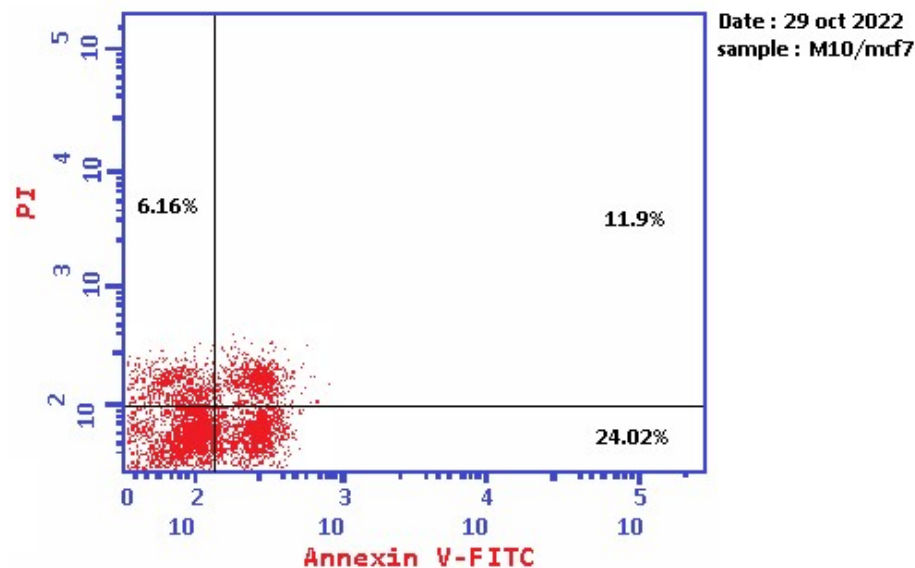

Docking simulation  
figures

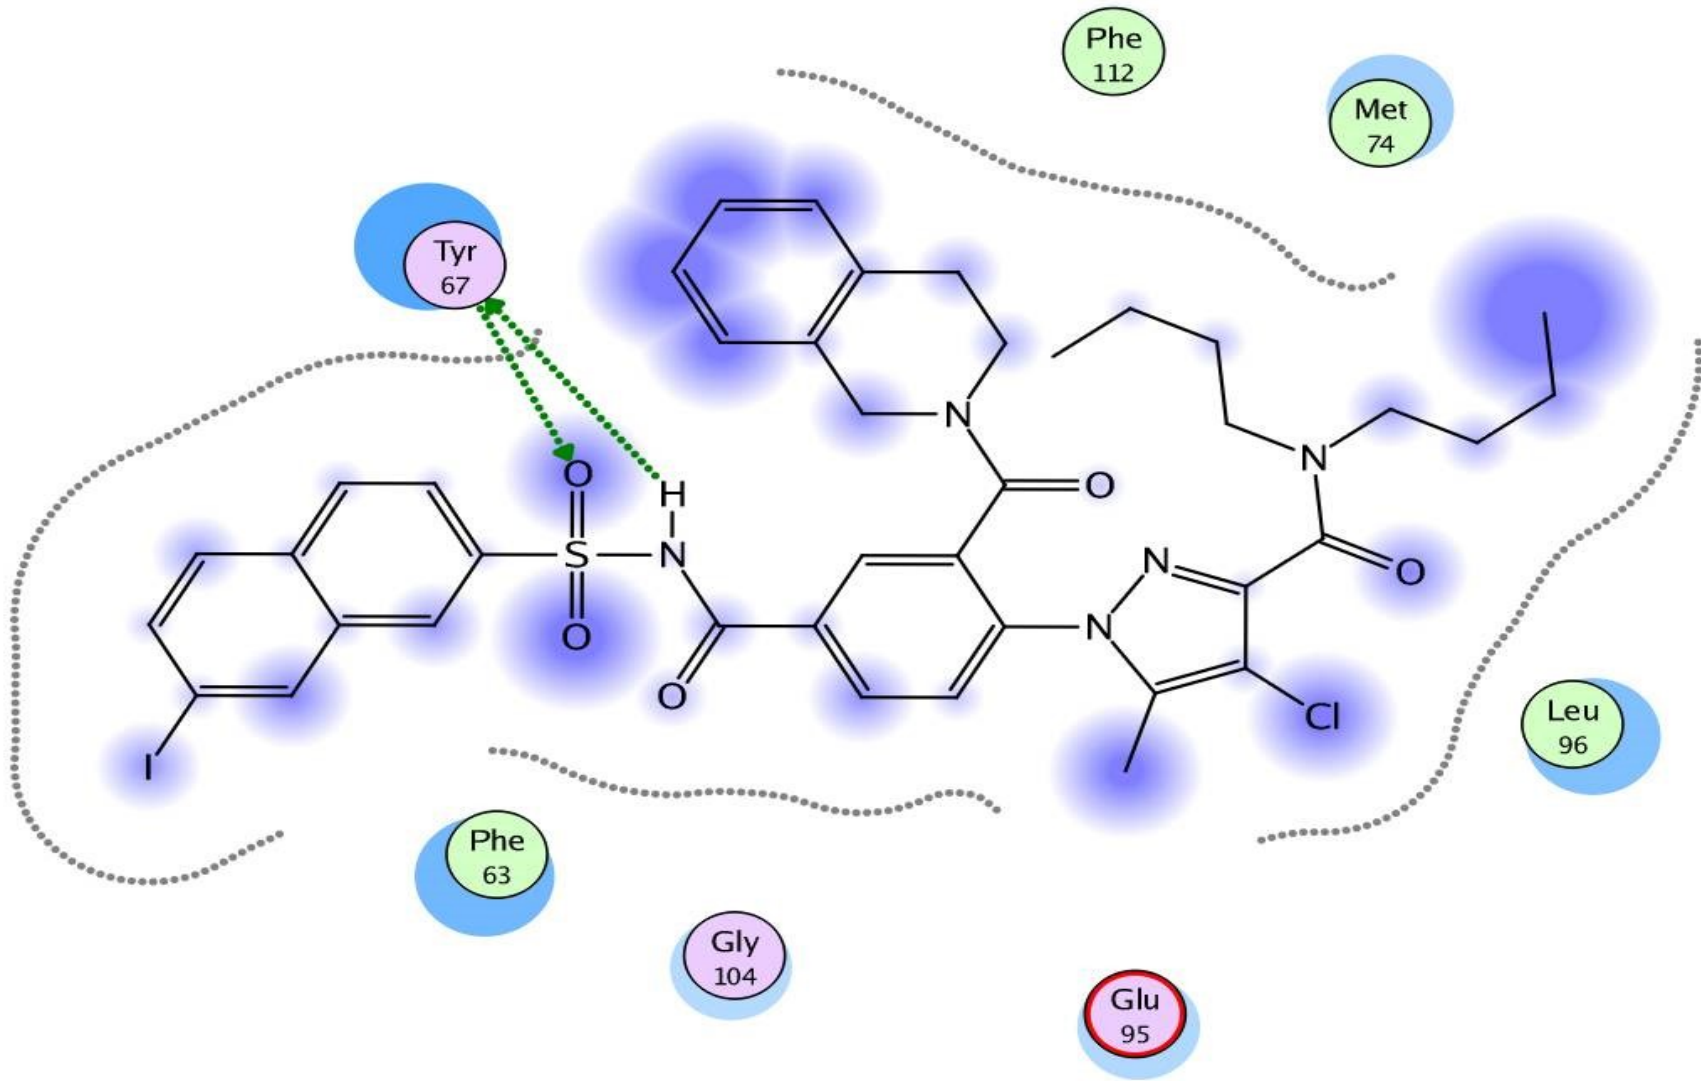

2D binding mode of co-crystallized ligand inside Bcl-2 binding pocket (**PDB**: 4AQ3)



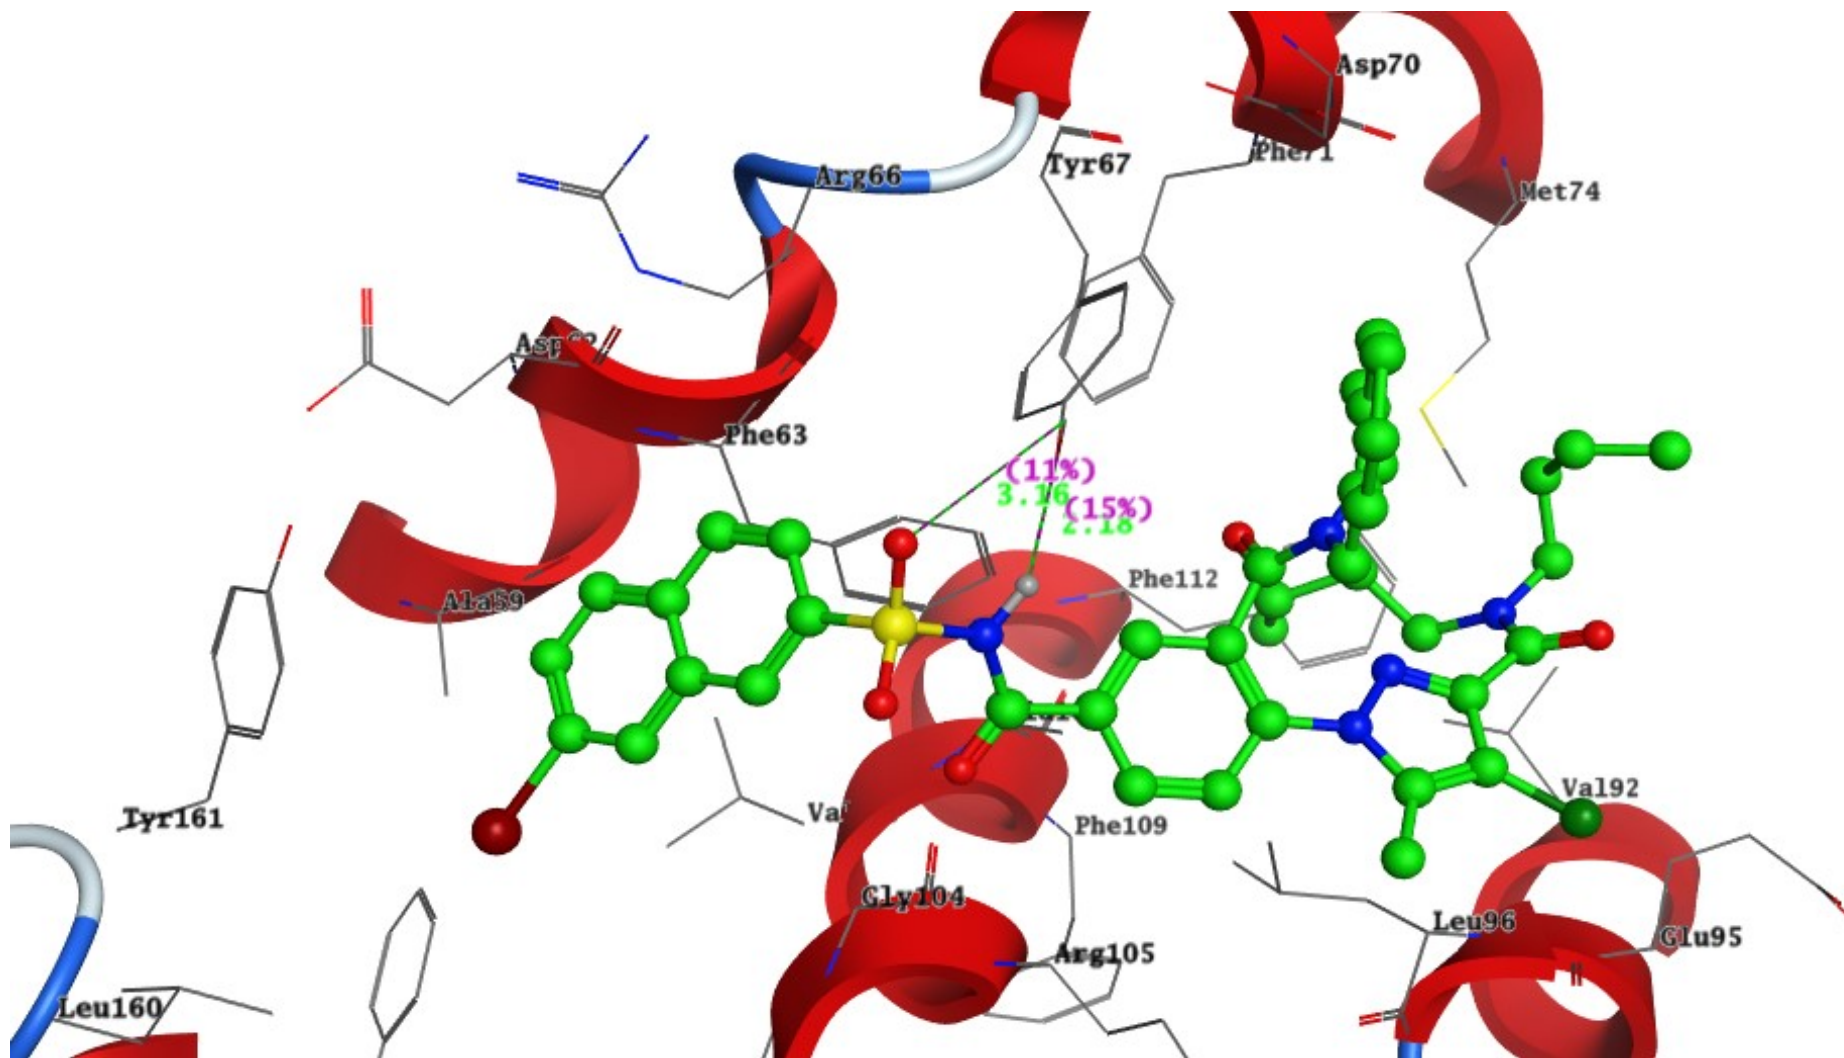

3D binding mode of co-crystallized ligand inside Bcl-2 binding pocket (PDB: 4AQ3)

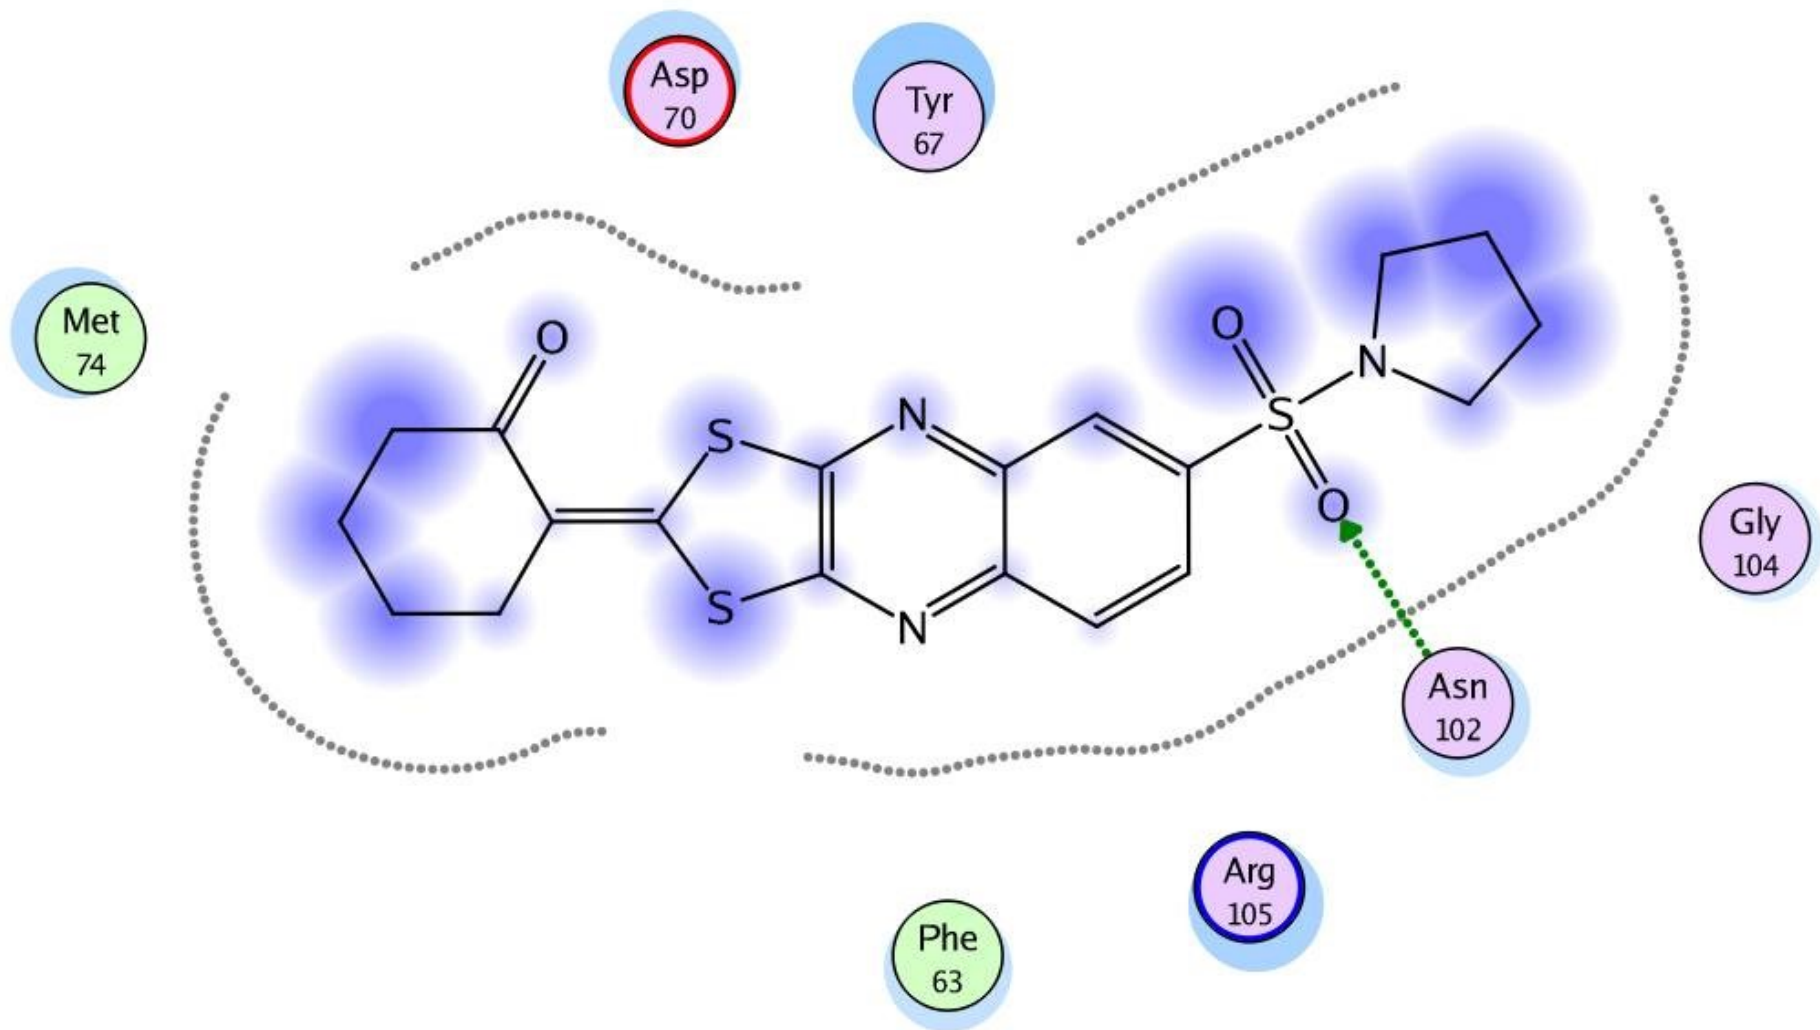

2D binding mode of compound **12** inside Bcl-2 binding pocket (PDB: 4AQ3)

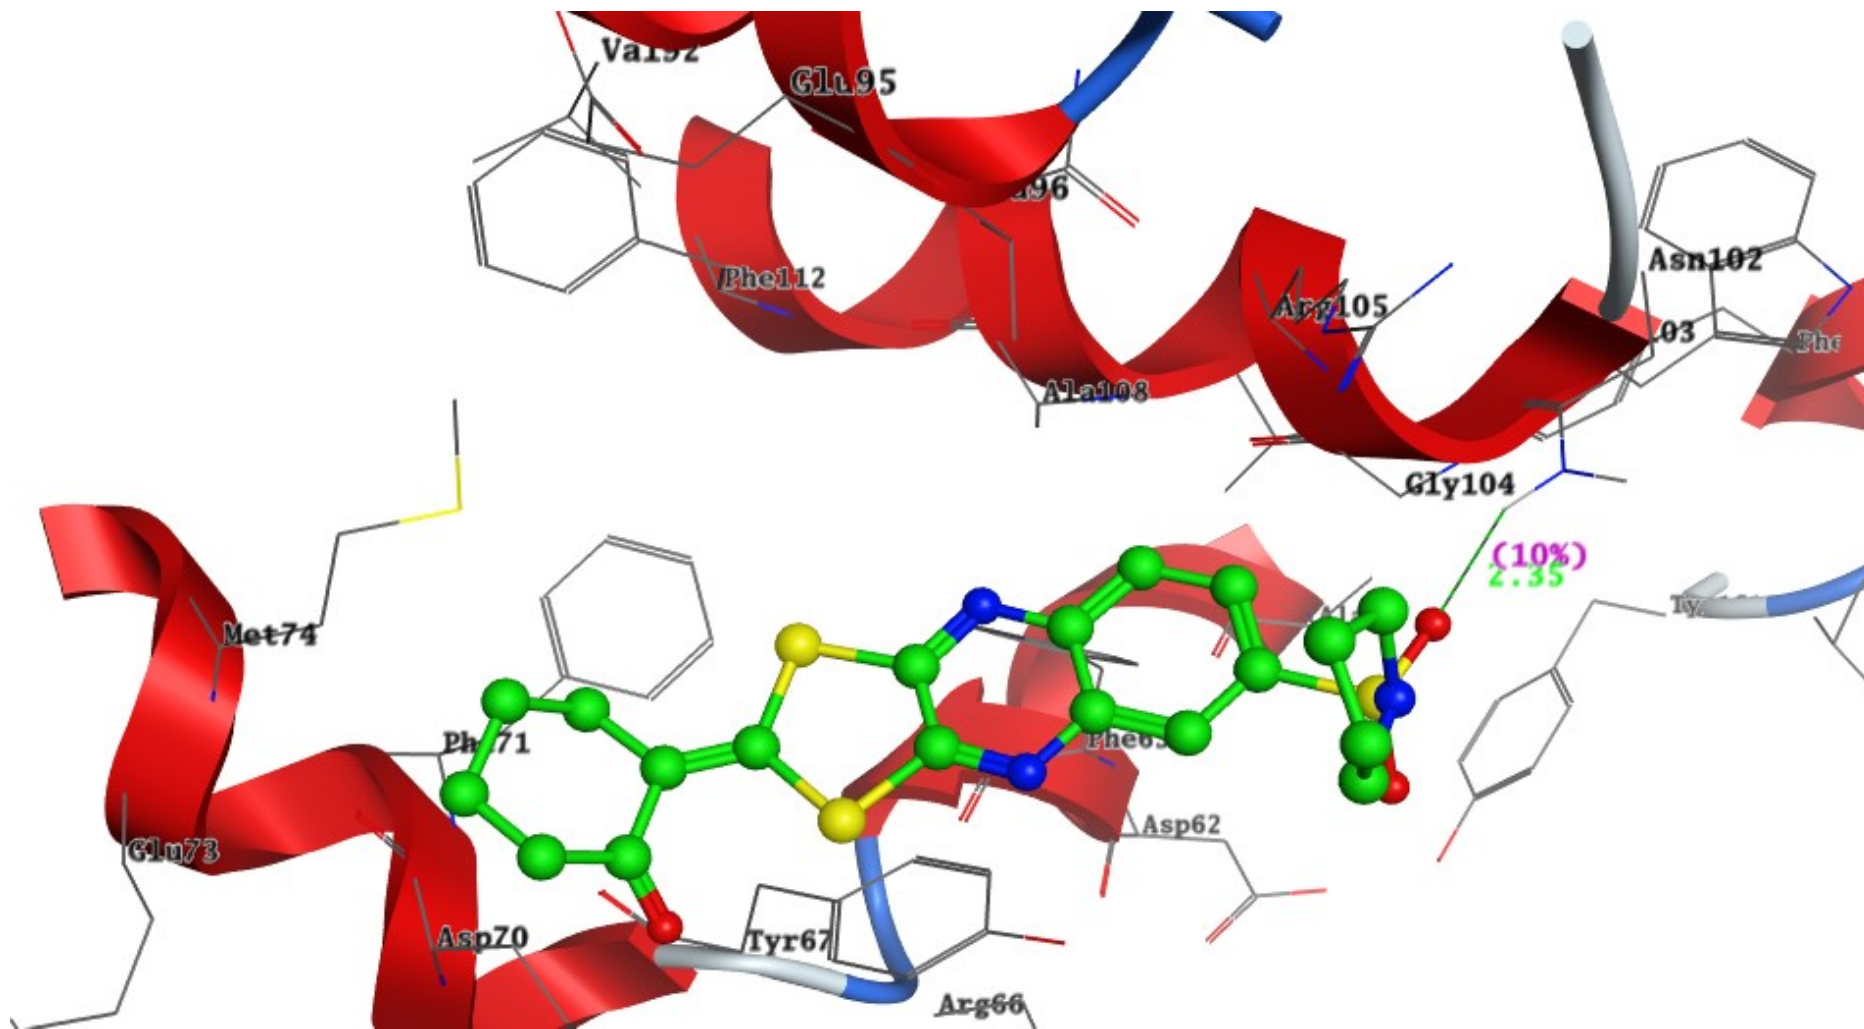

3D binding mode of compound 12 inside Bcl-2 binding pocket (PDB: 4AQ3)

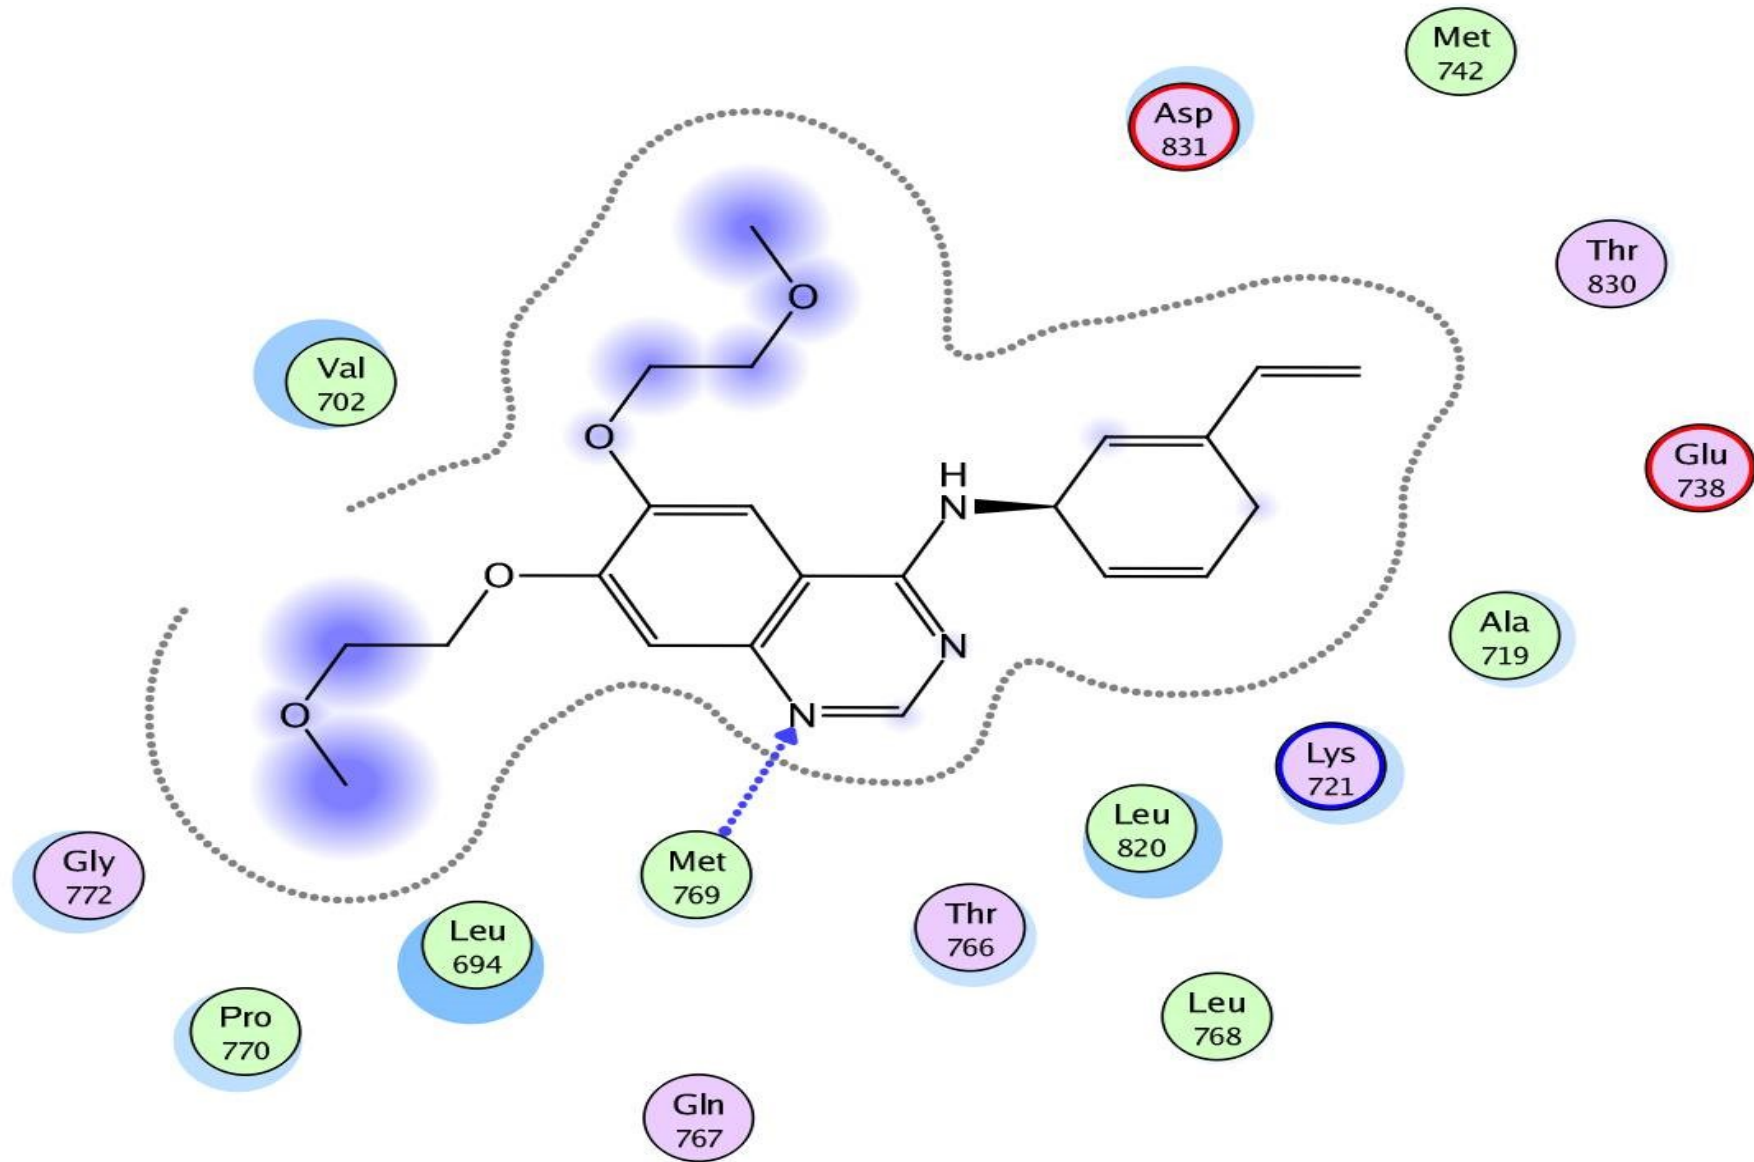

2D binding mode of co-crystallized ligand inside the EGFR binding pocket (PDB: 1M17)

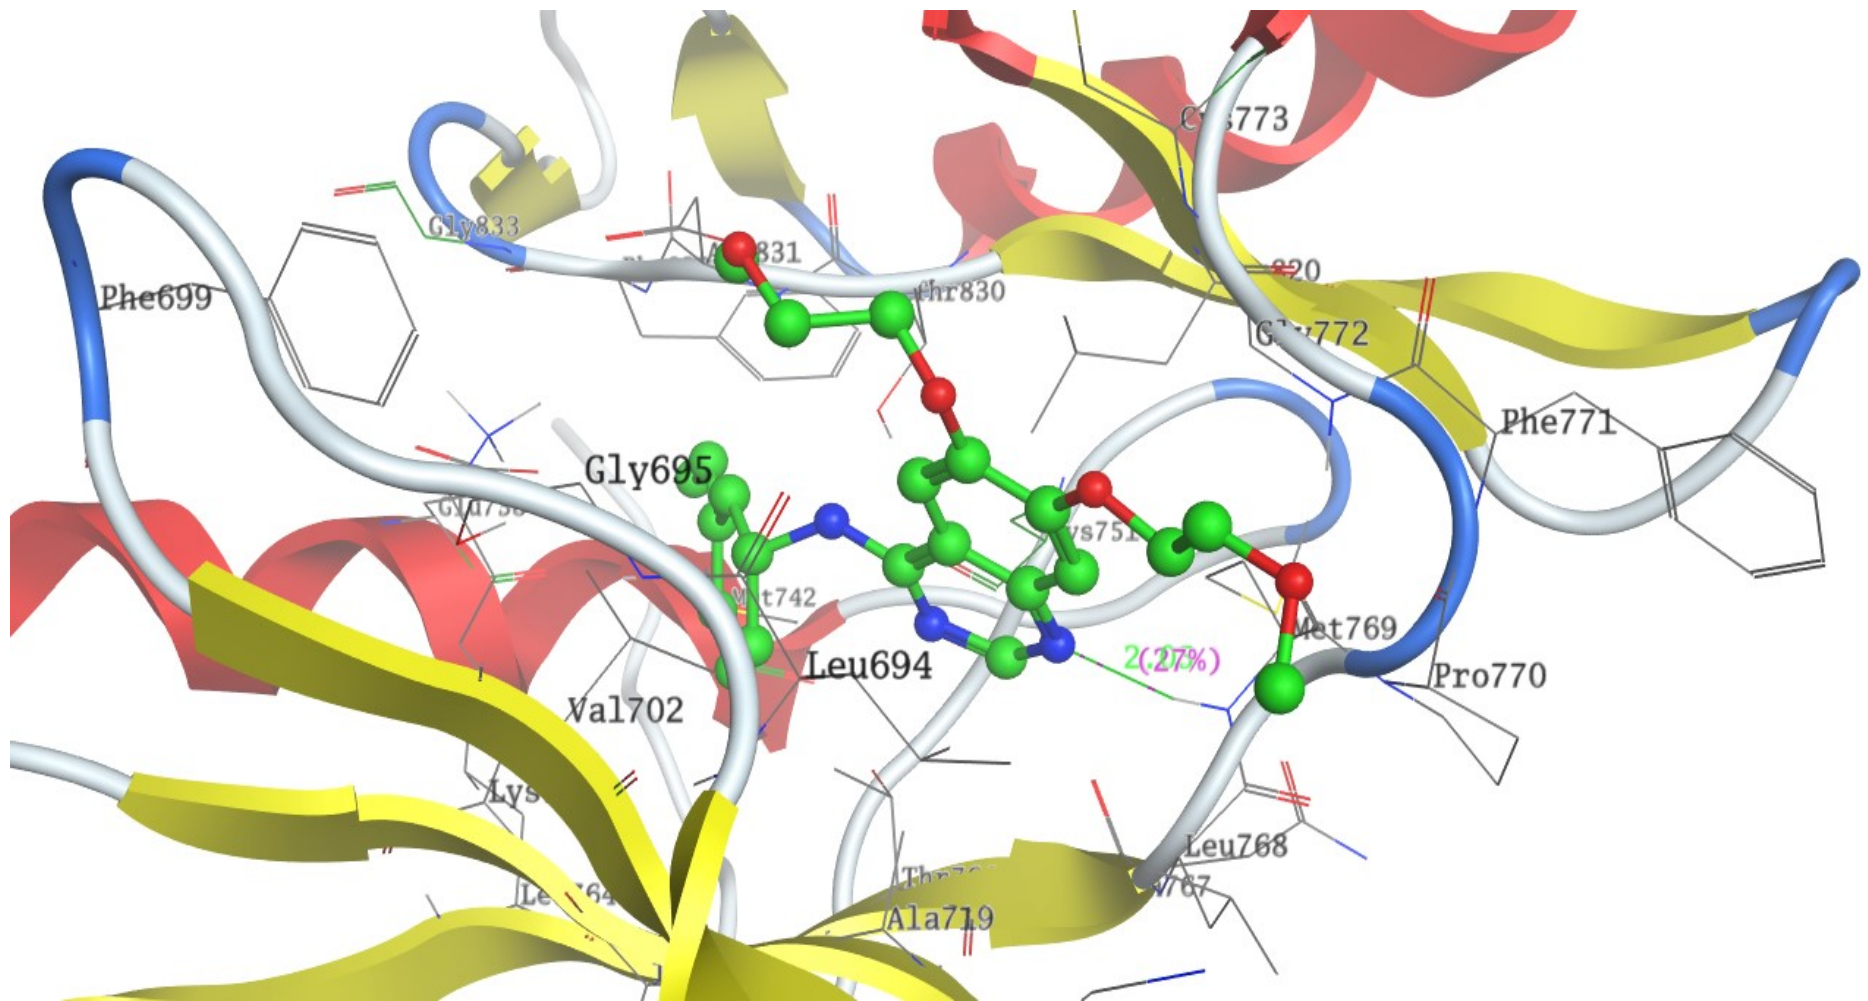

3D binding mode of co-crystallized ligand inside the EGFR binding pocket (PDB: 1M17)

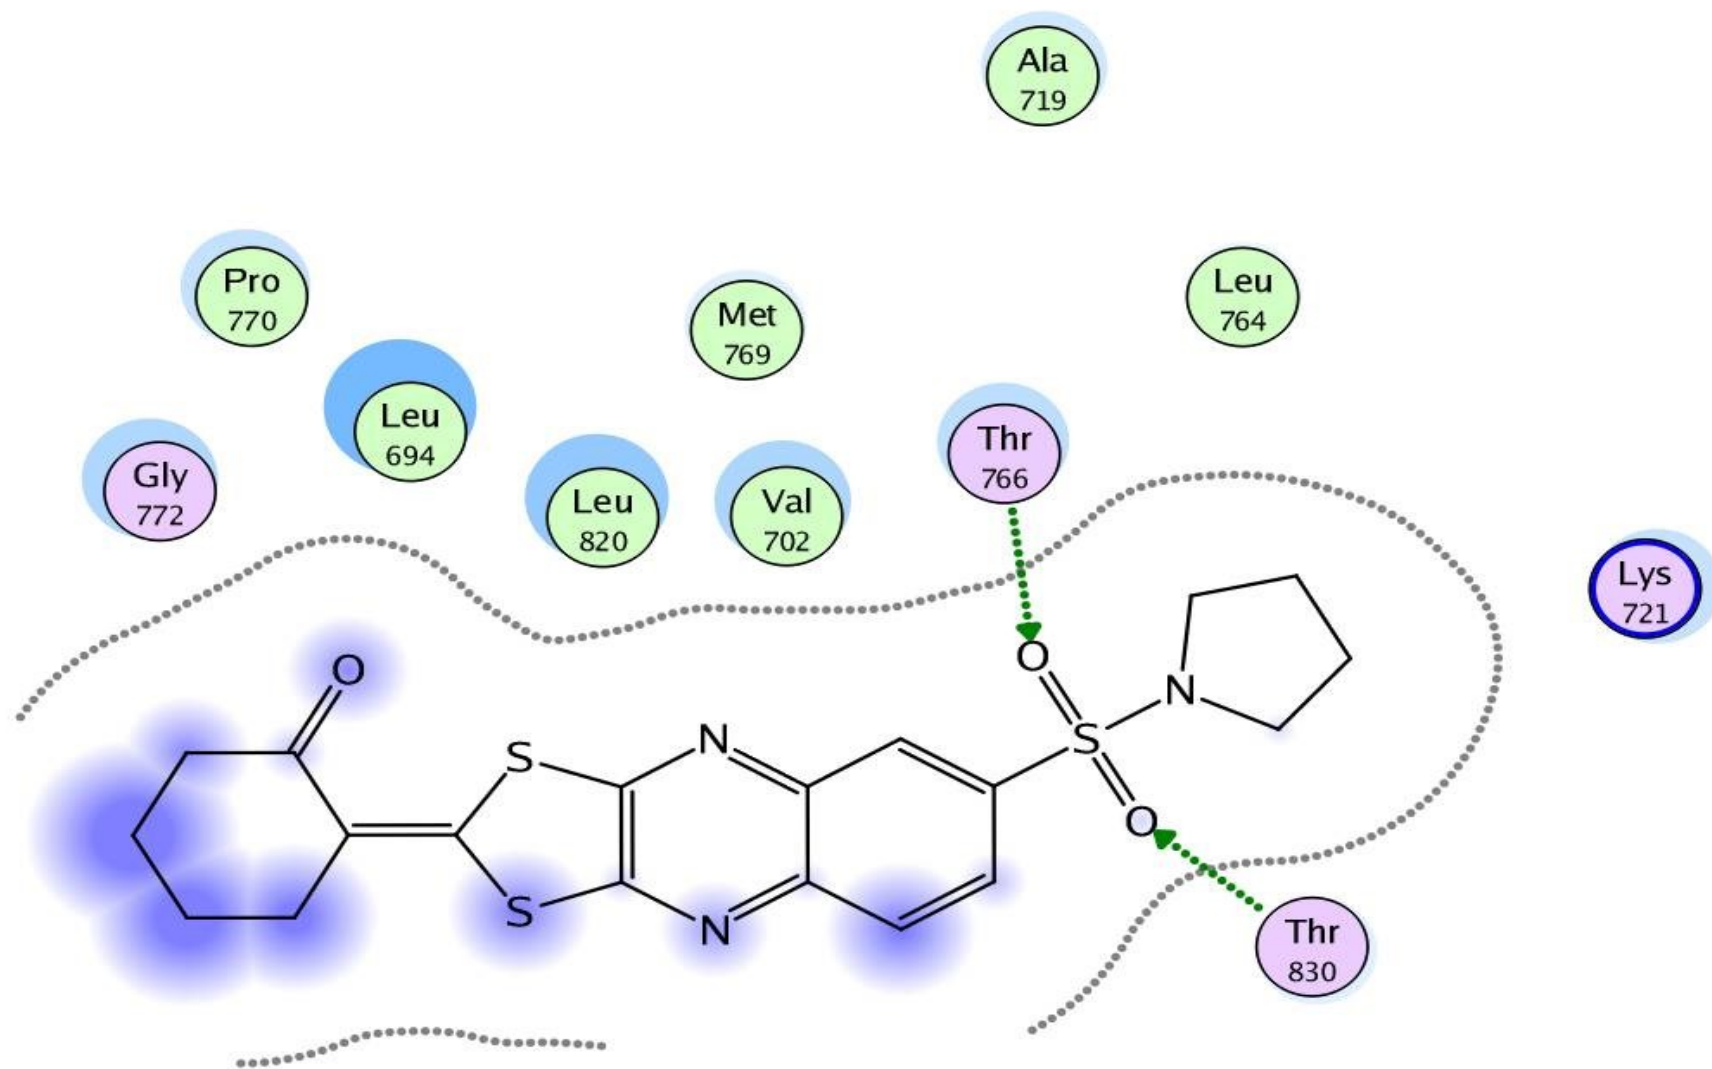

2D binding mode of compound **12** inside the EGFR binding pocket (PDB: 1M17)

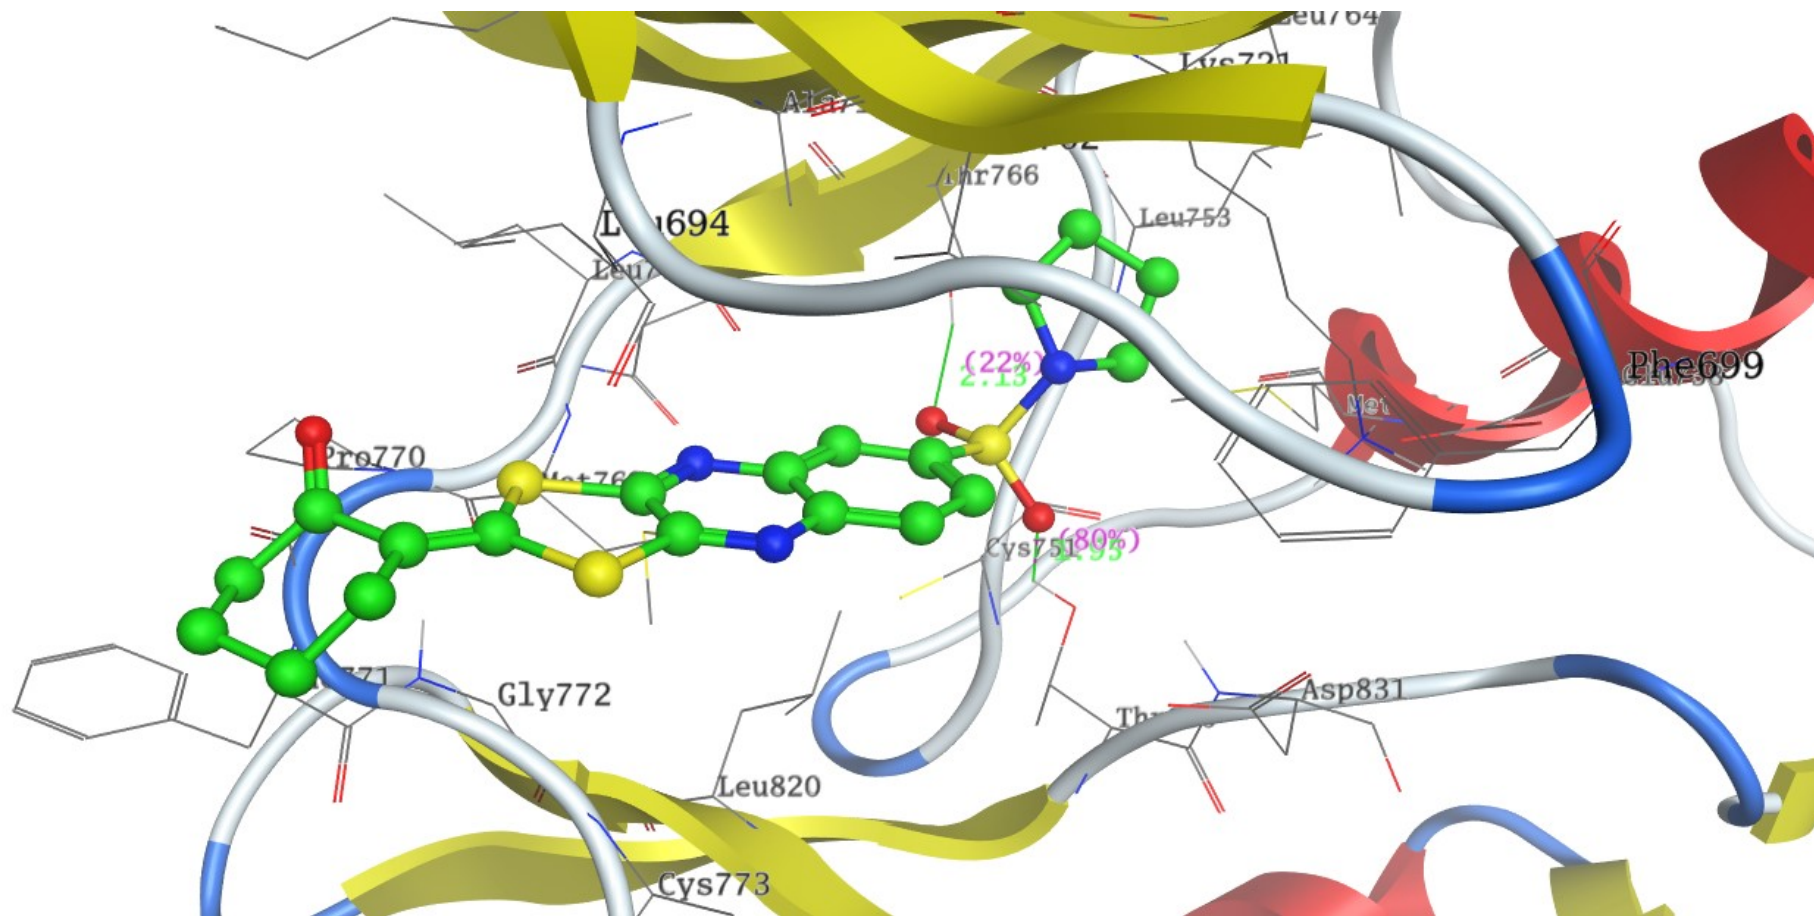

3D binding mode of compound **12** inside the EGFR binding pocket (PDB: 1M17)

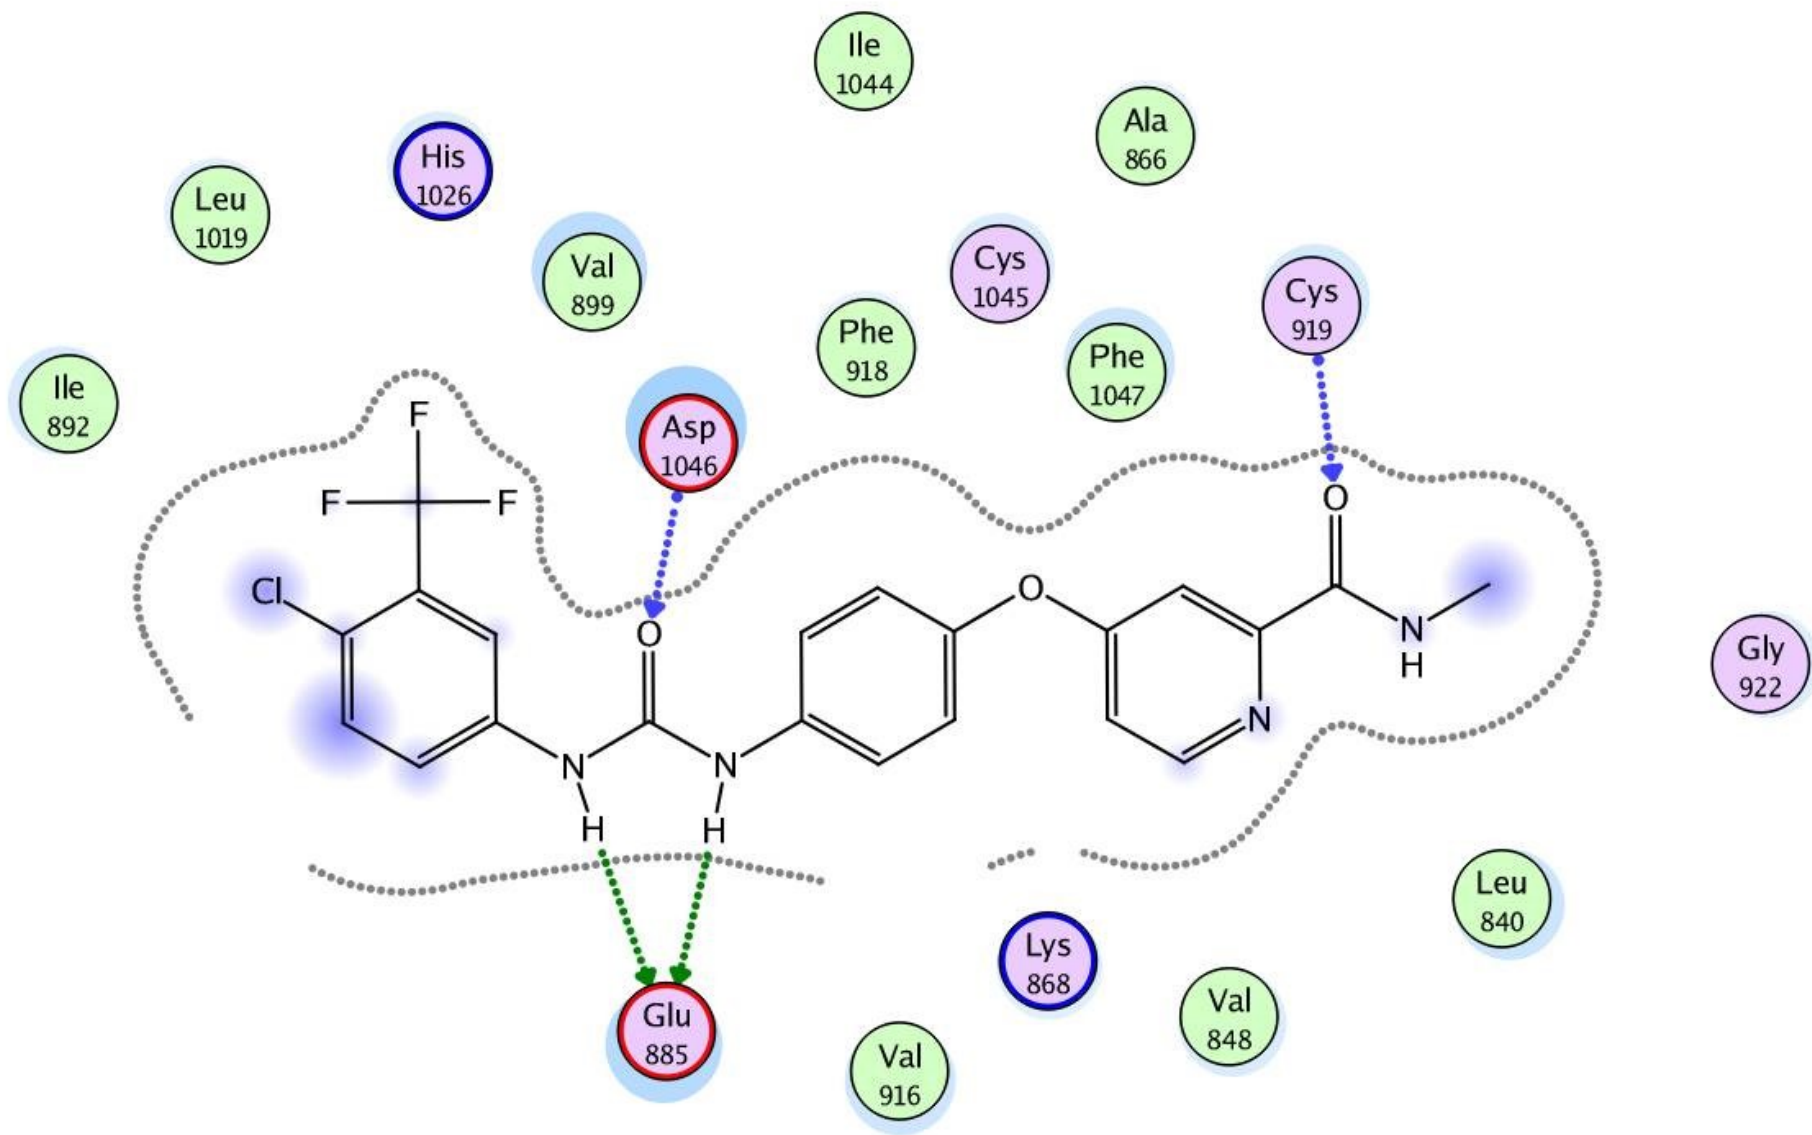

2D binding mode of co-crystallized ligand inside the VEGFR-2 binding pocket (PDB: 4ASD)



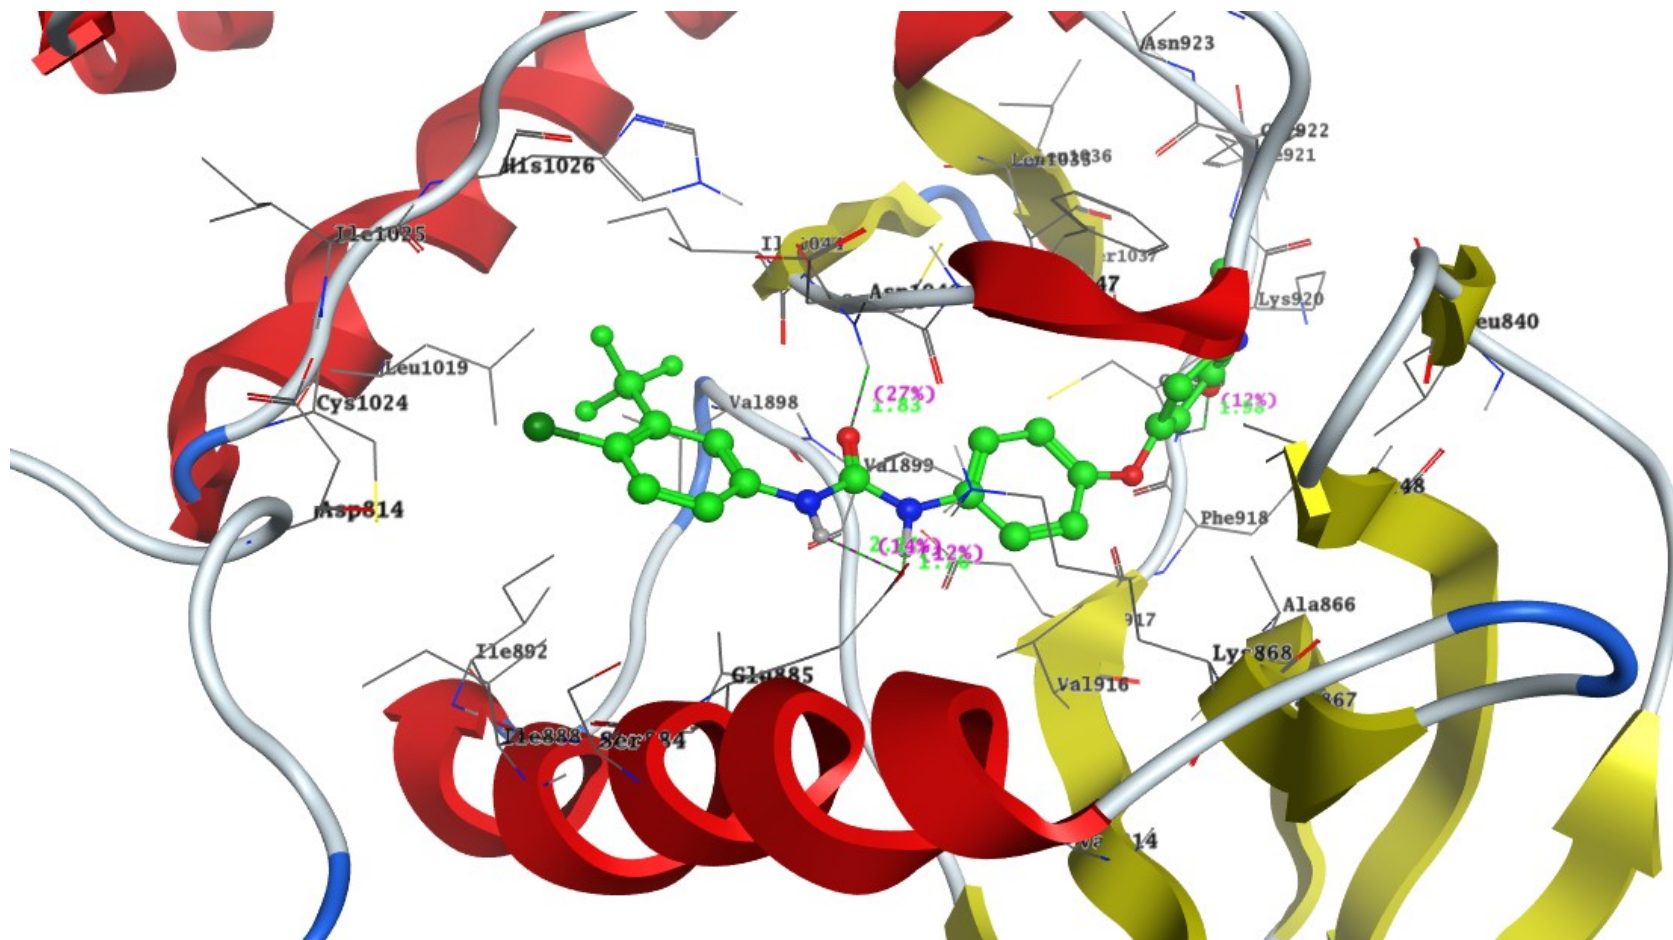

3D binding mode of co-crystallized ligand inside the VEGFR-2 binding pocket (PDB: 4ASD)

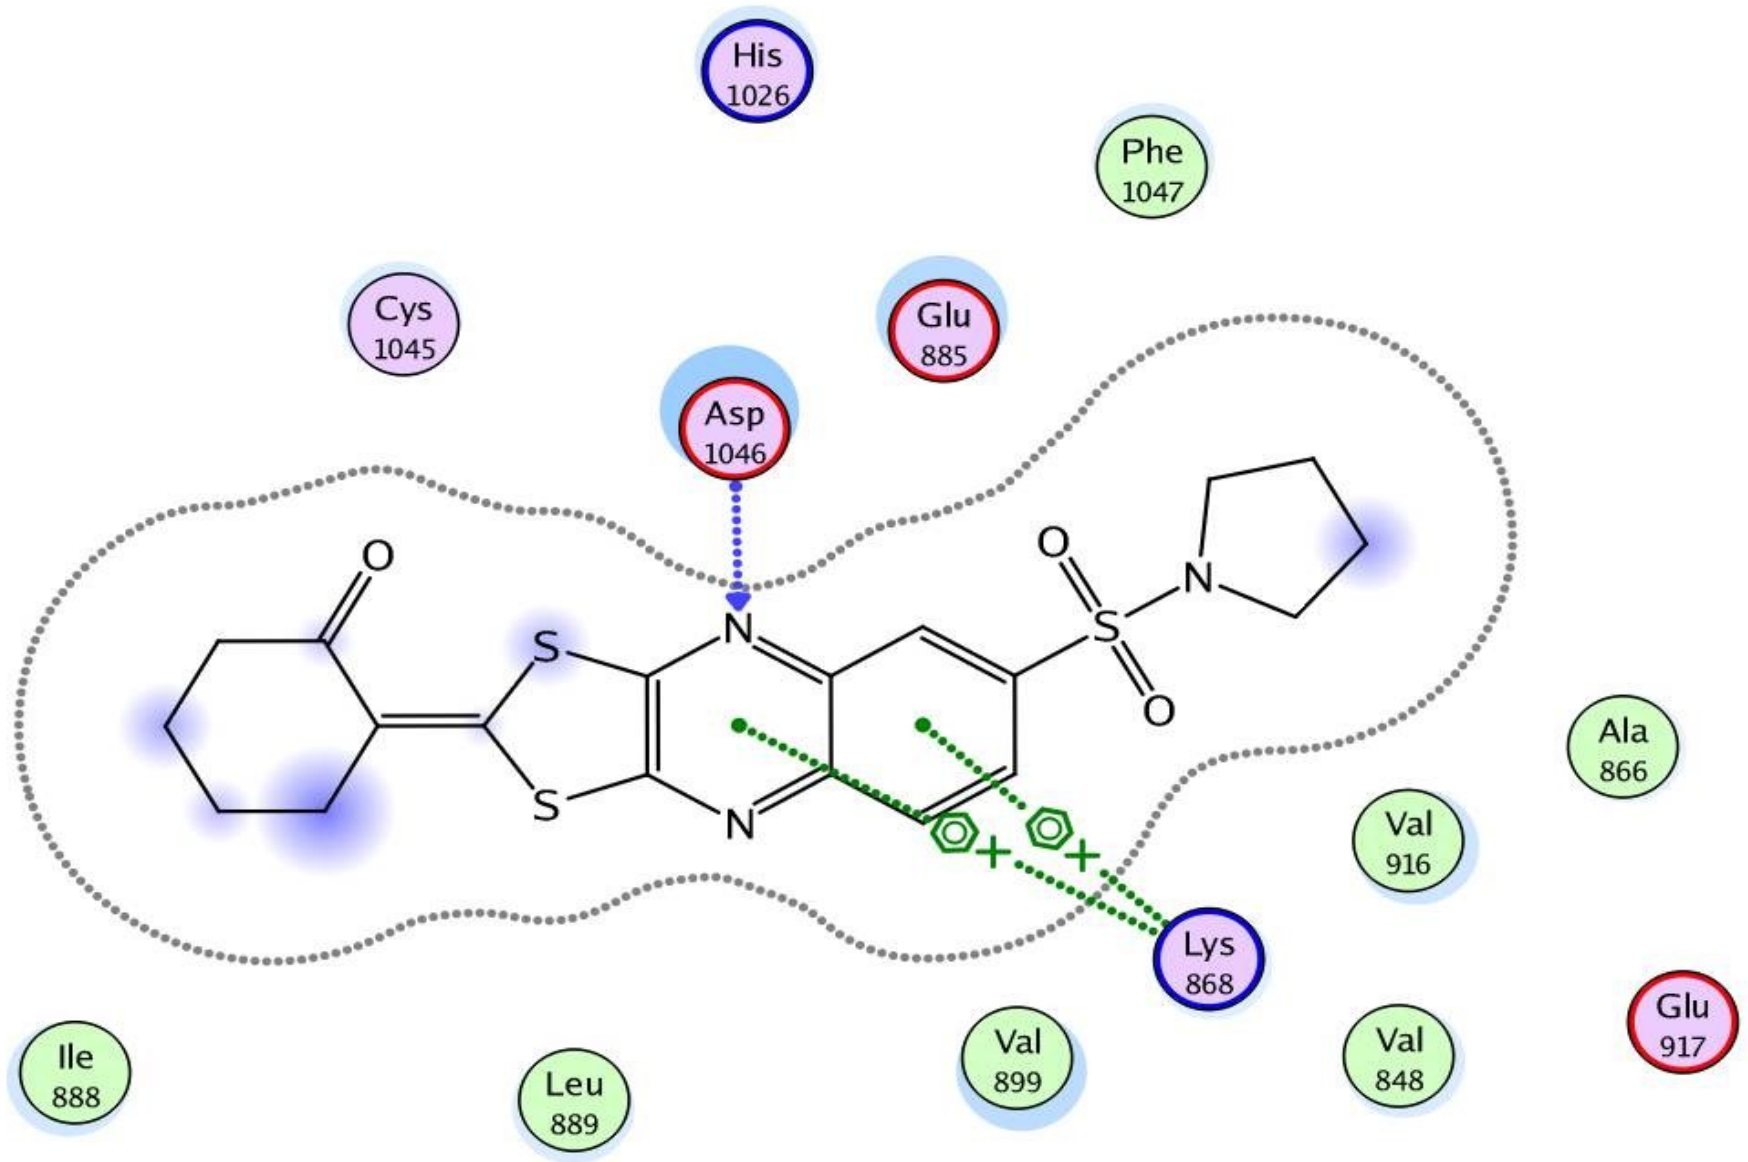

2D binding mode of compound **12** inside the VEGFR-2 binding pocket (PDB: 4ASD)

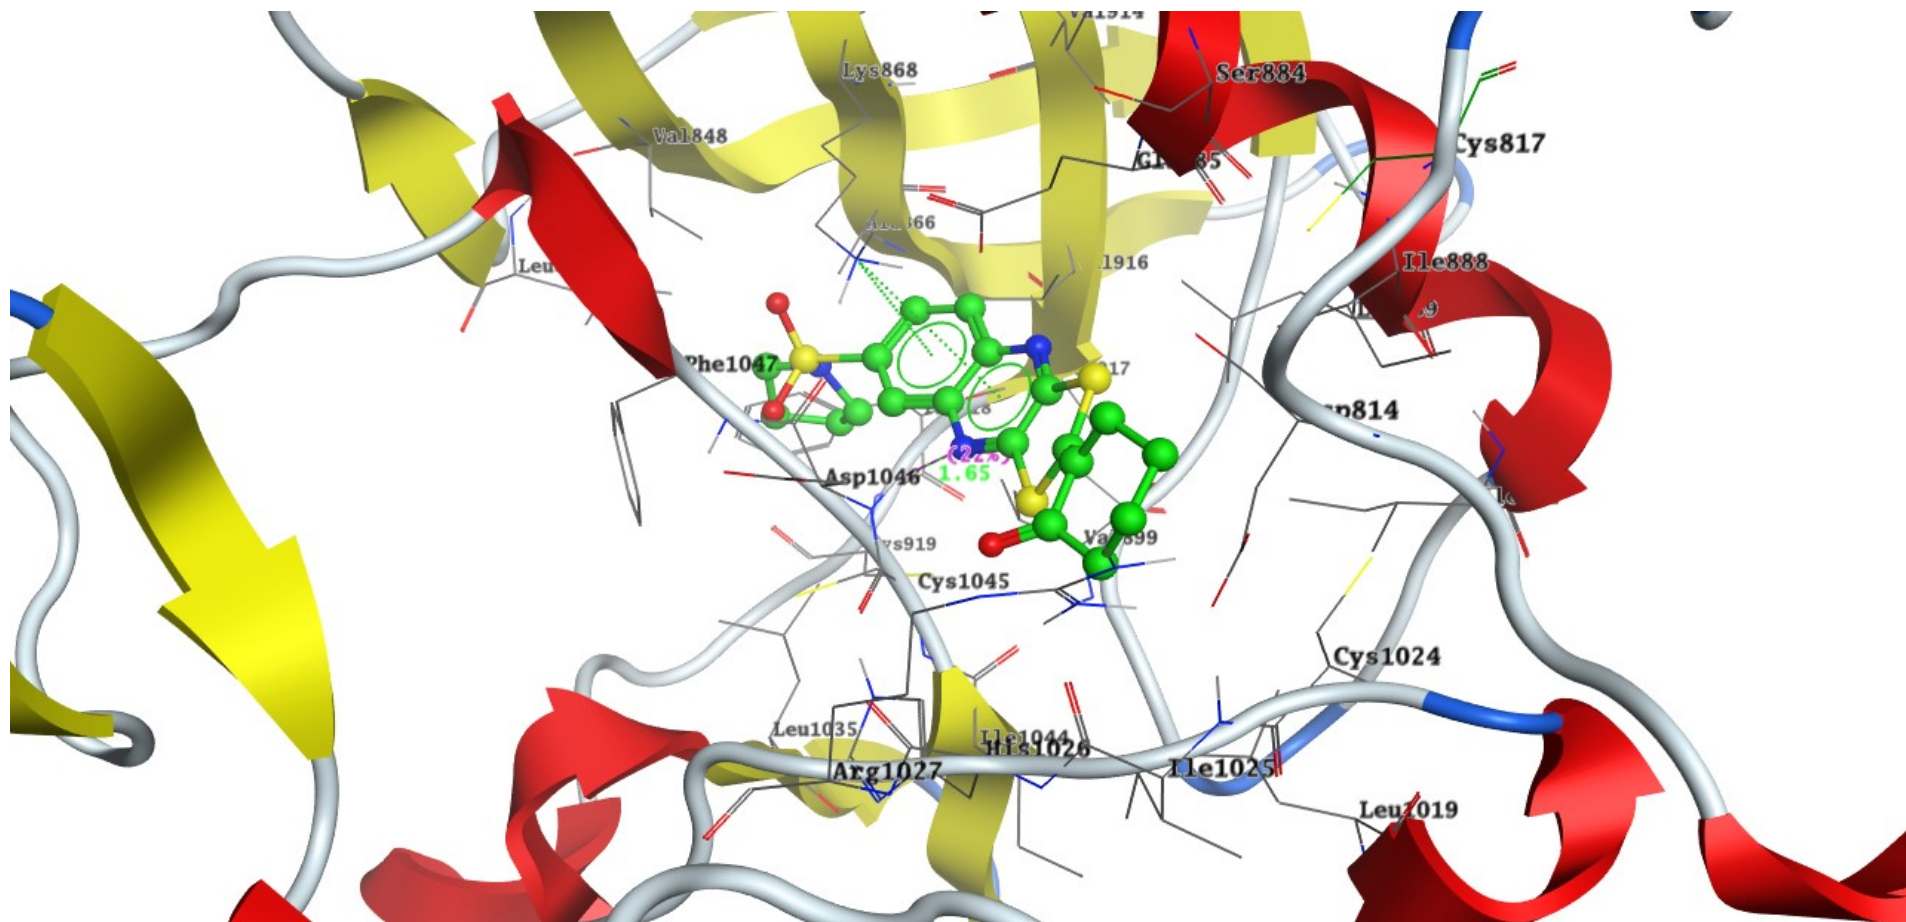

3D binding mode of compound 12 inside the VEGFR-2 binding pocket (PDB: 4ASD)
